# Supplementary material for: Impact of Compression Therapy on Cellulitis (ICTOC) in adults with chronic oedema: a randomised controlled trial protocol
Source: PubMed Central journal article supplement — BMJ Open. 2019 Aug 15;9(8):e029225. doi: 10.1136/bmjopen-2019-029225 (PMC6701661; doi:10.1136/bmjopen-2019-029225), 2019-08-15
Supplement: bmjopen-2019-029225.draft_revisions.pdf [file bmjopen-2019-029225.draft_revisions.pdf]

# BMJ Open

BMJ Open is committed to open peer review. As part of this commitment we make the peer review history of every article we publish publicly available.

When an article is published we post the peer reviewers' comments and the authors' responses online. We also post the versions of the paper that were used during peer review. These are the versions that the peer review comments apply to.

The versions of the paper that follow are the versions that were submitted during the peer review process. They are not the versions of record or the final published versions. They should not be cited or distributed as the published version of this manuscript.

BMJ Open is an open access journal and the full, final, typeset and author-corrected version of record of the manuscript is available on our site with no access controls, subscription charges or pay-per-view fees (<http://bmjopen.bmj.com>).

If you have any questions on BMJ Open's open peer review process please email [info.bmjopen@bmj.com](mailto:info.bmjopen@bmj.com)

# BMJ Open

## Impact of Compression Therapy on Cellulitis (ICTOC) in adults with chronic oedema: a randomised controlled trial protocol

|                               |                                                                                                                                                                                                                                                                                                                                                                                                                                                                                                                           |
|-------------------------------|---------------------------------------------------------------------------------------------------------------------------------------------------------------------------------------------------------------------------------------------------------------------------------------------------------------------------------------------------------------------------------------------------------------------------------------------------------------------------------------------------------------------------|
| Journal:                      | <i>BMJ Open</i>                                                                                                                                                                                                                                                                                                                                                                                                                                                                                                           |
| Manuscript ID                 | bmjopen-2019-029225                                                                                                                                                                                                                                                                                                                                                                                                                                                                                                       |
| Article Type:                 | Protocol                                                                                                                                                                                                                                                                                                                                                                                                                                                                                                                  |
| Date Submitted by the Author: | 17-Jan-2019                                                                                                                                                                                                                                                                                                                                                                                                                                                                                                               |
| Complete List of Authors:     | Webb, Elizabeth; Calvary Public Hospital, Physiotherapy; University of Canberra, Faculty of Health<br>Neeman, Teresa; Australian National University, Biological Data Science Institute<br>Gaida, Jamie; University of Canberra Research Institute for Sport and Exercise (UC-RISE)<br>Bowden, Francis; Calvary Public Hospital Bruce; Australian National University<br>Mumford, Virginia; Macquarie University, Australian Institute of Health Innovation<br>Bissett, Bernie; University of Canberra, Faculty of Health |
| Keywords:                     | INFECTIOUS DISEASES, Cellulitis, Recurrence, Lymphedema, Edema, Compression Stockings                                                                                                                                                                                                                                                                                                                                                                                                                                     |
|                               |                                                                                                                                                                                                                                                                                                                                                                                                                                                                                                                           |

SCHOLARONE™  
Manuscripts

**Title:** Impact of Compression Therapy on Cellulitis (ICTOC) in adults with chronic oedema: a randomised controlled trial protocol

**Authors:**

1. Elizabeth Webb, Physiotherapy Department, Calvary Public Hospital Bruce and University of Canberra, Canberra, Australia.
2. Teresa Neeman, Statistical Consulting Unit, Australian National University, Canberra, Australia.
3. Jamie Gaida, University of Canberra Research Institute for Sport and Exercise (UC-RISE), Canberra, Australia.
4. Francis J. Bowden, Calvary Public Hospital Bruce and Australian National University, Canberra, Australia.
5. Virginia Mumford, Australian Institute of Health Innovation, Macquarie University, Sydney, Australia.
6. Bernie Bissett, Faculty of Health, University of Canberra, Canberra, Australia.

**Correspondence:**

|             |                                                                                          |
|-------------|------------------------------------------------------------------------------------------|
| Name        | Elizabeth Webb                                                                           |
| Department  | Physiotherapy Department                                                                 |
| Institution | Calvary Public Hospital Bruce & University of Canberra                                   |
| Country     | Australia                                                                                |
| Address     | Physiotherapy Department, Calvary Public Hospital Bruce, Haydon Drive, Bruce<br>ACT 2617 |
| Tel         | +61 2 6201 6190                                                                          |
| Mob         | +61 412 959 294                                                                          |
| Fax         | +61 2 6201 6196                                                                          |
| Email       | elizabeth.webb@calvary-act.com.au                                                        |

**Key words:** cellulitis, recurrence, edema, lymphedema, compression stockings, physical therapy techniques

**Word Count:** (Abstract) 280  
(Body) 3857 (excluding table 1)

**References:** 29

**Tables:** 1

**Figures:** 1

**Competing interests:** Nil

- **Trial registration number:** ACTRN12617000412336 (Australia New Zealand Clinical Trials Registry)
- **Date Registered:** 22/03/2017

## ABSTRACT

### Introduction:

Cellulitis represents a significant burden to patients' quality of life and cost to the healthcare system, especially due to its recurrent nature. Chronic oedema is a strong risk factor for both an initial episode of cellulitis and cellulitis recurrence. Expert consensus advises compression therapy to prevent cellulitis recurrence in individuals with chronic oedema, however there is little supporting evidence. This research aims to determine if management of chronic oedema using compression therapy effectively delays recurrence of lower limb cellulitis.

**Methods and analysis:** A randomised controlled trial with cross-over will be used to assess the impact of compression therapy on clinical outcomes (time to next episode of cellulitis, rate of cellulitis-related hospital presentations, quality of life and leg volume). Using concealed allocation, 162 participants will be randomised into the intervention (compression) or control (no compression) group. Randomisation will be stratified by prophylactic antibiotic use. Participants will be followed up at 6 monthly intervals for up to 3 years, or until 43 episodes of cellulitis occur across the cohort. Following an episode of recurrent cellulitis, control group participants will cross-over to the intervention group. Survival analysis will be undertaken to assess the primary outcome measure of time to cellulitis recurrence. The hypotheses are that compression therapy to control lower limb chronic oedema will delay recurrent lower limb cellulitis, reduce the rate of associated hospitalisations, minimize affected limb volume and improve the quality of life of this population.

**Ethics and dissemination:** Ethics approval has been obtained from ethics committees of all relevant institutions. Results will be disseminated through relevant peer-reviewed journal articles and conference presentations.

**Trial registration number:** ACTRN12617000412336 (Australia New Zealand Clinical Trials Registry)

## ARTICLE SUMMARY

### Strengths and limitations of this study

- ICTOC is the first randomised controlled trial to assess whether management of chronic oedema using compression therapy will delay the recurrence of lower limb cellulitis. It will provide clinicians with new evidence regarding best practice management for the prevention of cellulitis.
- Randomisation of participants will be stratified by prophylactic antibiotic use to ensure antibiotic use does not confound treatment outcome.
- Due to the nature of the intervention, blinding is not feasible for participants or assessors.
- Assessment tools and methods (perometer, diagnosis of cellulitis by medical practitioners external to the trial, verification of data using the medical record or general practitioner) have been selected to minimise potential measurement bias.
- The use of broad inclusion criteria will allow for trial results to be generalised to adults across a range of settings nationally and internationally.

## BACKGROUND AND RATIONALE

Cellulitis is a common acute bacterial infection of the skin and subcutaneous tissue.<sup>1</sup> The majority of cellulitis episodes (69-81%) occur in the lower limbs.<sup>2-4</sup> In Australia lower limb cellulitis is associated with significant health costs due to frequent hospital admissions and high levels of morbidity. In 2014-2015 there were 59,466 hospitalisations for cellulitis,<sup>5</sup> with the average admission lasting 4.3 days.<sup>6</sup> In 2013-2014 cellulitis was the third leading cause of potentially preventable hospital admissions, with over half of all admissions for cellulitis being considered potentially preventable.<sup>6,7</sup> Erysipelas is an infection similar to cellulitis, which typically affects more superficial tissues. As the terms erysipelas and cellulitis are often used interchangeably and most clinical studies do not differentiate between them, this paper will consider them as one entity.

Recurrence of cellulitis is common and represents a significant proportion of the disease burden. In a 3 year time frame cellulitis has been reported to recur in 29-47% of patients,<sup>8,9</sup> with a case series in Sweden finding that 13% of patients admitted for cellulitis developed two or more recurrences within 3 years.<sup>9</sup> In light of the significant recurrence rates, effective interventions which reduce recurrence could limit the disease burden and improve patient outcomes.

Lymphoedema and chronic oedema are potent risk factors for developing lower limb cellulitis, and for its recurrence.<sup>4,8,10,11</sup> The terms lymphoedema and chronic oedema are often used interchangeably, although use of the term chronic oedema is becoming more common as an umbrella term to describe chronic swelling of tissues arising from multiple causes, including impaired lymphatic function.<sup>12</sup> It is broadly accepted that the relationship between cellulitis and chronic oedema is a vicious cycle.<sup>8,13</sup> Chronic oedema predisposes individuals to cellulitis and with each episode of cellulitis, the lymphatic system is further impaired, increasing residual oedema and heightening risk of future cellulitis infections.<sup>13</sup> Thus chronic oedema is not only a result of cellulitis but also increases risk of recurrence.<sup>13</sup>

The standard treatment for chronic oedema includes compression therapy and skin care.<sup>14</sup> Compression bandaging can be used to reduce oedema in a limb, and daily wear of compression garments is used to control oedema. There is general consensus that in addition to antibiotic prescription, compression to manage oedema should be an adjuvant treatment for patients with chronic oedema who are experiencing cellulitis recurrence.<sup>1,8,13,15</sup> Despite this common recommendation and the strong evidence supporting the relationship between oedema and cellulitis, there is a paucity of evidence to support the use of compression to manage chronic oedema to prevent cellulitis recurrence.

## Research Proposal

E.Webb

1  
2  
3 The time-intensive nature of compression therapy, and the fact that measuring meaningful outcomes  
4 requires lengthy assessment periods, probably contribute to the lack of research in this field. Only one  
5 study has been conducted on the impact of oedema management on cellulitis recurrence<sup>16</sup>, with a  
6 second study incidentally observing a reduction in 'infection' among patients receiving oedema  
7 management, although this was not a research objective.<sup>17</sup> While both studies support the hypothesis  
8 that oedema management decreases cellulitis recurrence, their conclusions are hampered by  
9 methodological limitations, including pre-post intervention methods, small sample sizes and change in  
10 infection rate not being specified a research objective.<sup>16 17</sup> A 2017 Cochrane systematic review of  
11 interventions to prevent cellulitis identified 6 studies investigating prophylactic antibiotics, but no  
12 other randomised trials investigating other prophylactic measures such as oedema management or  
13 skin care.<sup>18</sup> Thus further research into the efficacy of prophylactic measures other than antibiotic, is  
14 warranted.<sup>18</sup>

15  
16  
17  
18  
19  
20  
21  
22  
23  
24 The following protocol describes a randomised controlled trial (RCT) with cross-over to determine if  
25 the use of compression therapy for adults experiencing lower limb recurrent cellulitis and chronic  
26 oedema will delay cellulitis recurrence.

### RESEARCH HYPOTHESES

27  
28  
29  
30  
31  
32  
33 The hypotheses are that compression therapy to control lower limb chronic oedema will delay  
34 recurrent lower limb cellulitis, reduce the rate of associated hospitalisations, minimize affected limb  
35 volume and improve the quality of life of this population.

### RESEARCH OBJECTIVES

#### Primary objective

36  
37  
38  
39  
40  
41  
42  
43 To determine if compression therapy delays the recurrence of lower limb cellulitis in adults with  
44 lower limb chronic oedema and recurrent cellulitis.

#### Secondary Objectives

45  
46  
47  
48  
49 To determine if, in adults with lower limb chronic oedema and recurrent cellulitis, compression  
50 therapy; (1) reduces the rate of cellulitis-related hospital presentations; (2) reduces affected leg  
51 volume; and (3) improves quality of life (QOL).

### TRIAL DESIGN

52  
53  
54  
55  
56  
57 A randomised controlled trial with cross-over will be used to assess the impact of compression  
58 therapy on clinical outcomes (time to next episode of cellulitis, rate of cellulitis-related hospital  
59 presentations, QOL and leg volume). Participants will be randomised to the intervention or control  
60

## Research Proposal

E.Webb

1  
2  
3 group by block randomisation using sealed opaque envelopes. As prophylactic antibiotics have been  
4 shown to influence cellulitis recurrence,<sup>18</sup> randomisation of participants will be stratified by  
5 prophylactic antibiotic use. For participants in the control group, once an episode of cellulitis has  
6 occurred, they will cross-over into the intervention group to receive compression therapy. Figure 1  
7 shows the proposed participant allocation process.  
8  
9  
10

11  
12 The absence of high-quality evidence regarding the impact of compression therapy on recurrence of  
13 cellulitis means there is uncertainty as to whether it is an effective intervention, justifying the use of  
14 an RCT. While there is no high-quality evidence to support use of the compression therapy to prevent  
15 cellulitis in this patient population, it reflects the accepted expert opinion and the standard clinical  
16 practice of the institution conducting the trial. Therefore, the trial design crosses the control group  
17 participants over into the intervention group following the first episode of cellulitis to ensure no  
18 participant continues to experience recurrent cellulitis episodes without receiving the institution's  
19 standard intervention.  
20  
21  
22  
23  
24  
25  
26  
27

28 **Figure 1:** Anticipated participant flow through trial.  
29  
30  
31  
32  
33  
34  
35  
36  
37  
38  
39  
40  
41  
42  
43  
44  
45  
46  
47  
48  
49  
50  
51  
52  
53  
54  
55  
56  
57  
58  
59  
60



## METHODS

### Study setting and population

The trial will be conducted at the Calvary Public Hospital Bruce (CPHB) outpatient lymphoedema clinic. Adults with lower limb chronic oedema and a history of recurrent cellulitis who meet the eligibility criteria will be recruited from the two major ACT public Hospitals (CPHB and Canberra Hospital) and general practitioners servicing the ACT and nearby NSW residents.

### Eligibility criteria

#### *Inclusion criteria*

- $\geq 18$  years of age
- $\geq 2$  episodes of cellulitis in the same leg in the past 2 years (at the time of referral)
- Chronic oedema (oedema persisting  $\geq 3$  months) in the leg/s that have had recurrent cellulitis diagnosed (presence of oedema confirmed by a lymphoedema therapist through interview and physical examination)
- Understanding of involvement in the study as per the participant information sheet
- Provision of informed consent
- Able to attend regular scheduled appointments for the duration of the study
- Has a valid Medicare number

#### *Exclusion criteria*

- Currently wearing effective compression garments ( $\geq$  compression class 2, or compression class 1 if considered effective by a lymphoedema therapist) regularly ( $\geq 5$  days per week)
- Declines to participate or is unable to participate for whatever reason
- Receiving end of life care
- Medically unstable
- Chronic wound/ulcer, or a wound/ulcer requiring specialist treatment or treatment that prevents the use of compression garments
- Unable to wear compression (unable to don/doff garments or has a medical condition that contraindicates use of compression)

### Interventions

All assessments, interventions and outcome measures will be conducted by a physiotherapist or occupational therapist who meets the registration requirements for category one of the Australian National Lymphoedema Practitioners Register.<sup>19</sup>

At the initial appointment eligibility will be formally checked, and those who consent to participate will undergo stratified randomisation using sealed, opaque, and identical envelopes that are

## Research Proposal

E.Webb

1  
2  
3 sequentially numbered. Prior to randomisation, baseline measures, referral source and demographics  
4 will be captured. Presence of identified potential risk factors for cellulitis will also be recorded,  
5 including history of tinea or other fungal infections between toes, diabetes mellitus, obesity and  
6 chronic venous insufficiency.<sup>3 4 10 20 21</sup>  
7  
8  
9

10  
11 At the initial appointment participants in both the control and intervention groups will receive  
12 education (verbal and written) regarding cellulitis and how to decrease the risk of recurrence.  
13 Education will include the benefits of skin care, prevention of tinea or other fungal infections between  
14 toes, maintaining a healthy body weight and regular exercise.  
15  
16  
17

18  
19 For the intervention group, the initial appointment will also be used to plan appropriate compression  
20 therapy which will be provided at subsequent appointments. Compression therapy will involve  
21 application of compression garments (compression stockings or wraps) and may or may not involve  
22 compression bandaging to minimise oedema prior to fitting of compression garments. The number of  
23 appointments necessary for provision of compression therapy will be individualised to meet  
24 participant requirements.  
25  
26  
27  
28  
29

30 Participants in both groups will be followed for up to 3 years at 6 monthly intervals (Table 1) to  
31 complete outcome measures and to continue to receive the allocated treatment (education with or  
32 without compression therapy). At each appointment the therapist will inform each participant of  
33 changes in their limb volume, providing tangible feedback to support ongoing participant attendance.  
34 Throughout the trial, participants in the intervention group may require additional appointments for  
35 compression therapy (compression bandaging, and measure for and provision of compression  
36 garments). Intervention compliance (number of days per week garments are worn) and adverse effects  
37 will be captured by self-report.  
38  
39  
40  
41  
42  
43

44 Recurrence of cellulitis will be checked at scheduled appointments, however if a participant reports a  
45 recurrence between scheduled assessments, they will be reviewed at an additional appointment to  
46 record outcome measures (table 1), and to commence cross-over for control group participants.  
47 Following the first episode of recurrent cellulitis, participants in the control group will be crossed over  
48 to receive compression therapy for the remaining duration of the trial. Date of cross-over will be  
49 defined as the day compression garments are initially fitted.  
50  
51  
52  
53  
54  
55  
56

### Outcome measures

57 Table 1 shows the timeline for completion of trial activities and outcome measures.  
58  
59  
60

## Research Proposal

E.Webb

1  
2  
3 The primary outcome is 'observed time to first episode of cellulitis recurrence'. Cellulitis recurrence  
4 will only be assessed in a leg that has been assessed as having chronic oedema, thus if cellulitis occurs  
5 in a leg that was not previously identified as having chronic oedema, the infection will not be  
6 considered a recurrence. Cellulitis will be diagnosed by medical practitioners external to the study.  
7 Date of cellulitis recurrence (and associated hospitalisation) will be gained by participant self-report  
8 and may be verified using medical records from the hospitals and/or general practitioners.  
9  
10  
11  
12  
13

14 Secondary outcomes include: (1) rate of cellulitis-related hospital admissions; (2) percent change in  
15 leg volume from baseline, measured using the perometer; (3) QOL, assessed using the LYMQOL and  
16 EuroQol Five Dimension Scale (EQ-5D-3L). Occurrence of cellulitis-related hospital admissions will  
17 be measured in the same manner as cellulitis recurrence.  
18  
19  
20  
21

22 Percent change in leg volume will be measured using a perometer, an optoelectronic imaging device  
23 designed to measure limb volume.<sup>22</sup> The perometer has excellent intra-rater reliability (ICC= 1.0, 95%  
24 CI: 0.99 to 1.00) and inter-rater reliability (ICC= 1.0, 95% CI: 0.97 to 1.00), is sensitive to changes in  
25 limb volume,<sup>23-25</sup> and is a valid measure of knee volume.<sup>22</sup> Leg volume will be measured between  
26 53mm and 400mm height from the ground using the perometer. Monthly calibration of the perometer  
27 will be conducted using a standardised object of known volume (875ml) to minimise instrument error,  
28 ensuring consistency of this measurement device across the duration of the trial. Use of this device  
29 will also prevent potential differential measurement bias arising from lack of therapist blinding.  
30  
31  
32  
33  
34  
35

36 Where limb volume cannot be measured using the perometer, due to impaired mobility of a  
37 participant or equipment failure, summated circumferential leg measurements will be used following  
38 expert clinical guidelines. Circumferential leg measures will be taken at the mid foot, oblique ankle  
39 and at 10, 20, 30 and 40cm intervals up the leg using a measurement board. Circumferential limb  
40 measurement also has excellent intra-rater reliability (ICC=0.977-0.996, 95% CI: 0.960-0.998) and  
41 inter-rater reliability (ICC= 0.942- 0.994, 95% CI: 0.936-0.997).<sup>26</sup>  
42  
43  
44  
45  
46

47 Quality of life will be measured using LYMQOL, a validated, condition-specific quality of life tool  
48 for people with lower limb lymphoedema,<sup>27</sup> and the EQ-5D-3L, a generic preference-based measure  
49 of health related quality of life that comprises of five dimensions of health.<sup>28</sup> The EQ-5D can be used  
50 to calculate quality adjusted life years (QALYs) for the purpose of economic evaluation.<sup>28</sup> A  
51 systematic review has found the EQ-5D has good validity and responsiveness for people with skin  
52 diseases, although the tool has not been specifically validated within a population suffering  
53 cellulitis.<sup>28</sup>  
54  
55  
56  
57  
58  
59  
60

**Research Proposal**

E.Webb

Exploratory analysis will be conducted to test the robustness of the trial hypotheses and may include assessment of cellulitis recurrence post cross-over, intervention compliance, participant demographics, risk factors, and per protocol analysis.

**Sample size and duration of follow up**

The sample size has been calculated for the primary objective of detecting a difference in time to cellulitis recurrence between the control and intervention groups. The sample size estimation is based upon the assumptions that the 3-year cellulitis recurrence rate in control participants is approximately 47%<sup>8</sup> and compression therapy will reduce the 3-year incidence of recurrent cellulitis by 50%.<sup>16 17</sup> Assuming that events occur at a constant rate, these assumptions correspond to a hazard ratio of 0.42. The eligibility criteria of two or more episodes of cellulitis in the same leg in the past 2 years has been used so that the trial cohort have an increased likelihood of cellulitis reoccurring during the follow up period.

It is assumed that patients will be recruited over a 2.5-year period, and the total study duration will be 3.5 years. Length of participant follow up will vary based on time of enrolment. Using a sequential design software package gsDesign in R<sup>29</sup>, in order to detect a hazard ratio of 0.42 with 80% power and 2.5% (1-sided) type 1 error, a total of 45 cellulitis recurrences are needed. Under the present recruitment and recurrence assumptions, we plan to recruit 162 participants (81 per arm).

An interim analysis will be performed by a Data Monitoring Committee after 23 episodes of cellulitis. A log rank test will be used to assess group differences. If a nominal (1 sided) significance level of  $p=0.003$  is detected, indicating a strong clinical effect, the study will be ceased. If the Data Monitoring Committee recommends that the study continue to 45 episodes of cellulitis, the final analysis will use a log rank test with (1-sided) significance level  $p=0.0238$ . These efficacy bounds were derived using a Hwang-Shih-DeCani spending function with  $\gamma = -4$  to preserve an overall Type I error rate of 5%.

**Recruitment and enrolment of participants**

Recruitment will be conducted over a 2.5-year period. A multi-faceted recruitment strategy will be used. In order to capture acute patients (seen in CPHB and Canberra Hospital emergency departments and wards), all patients diagnosed with lower limb cellulitis during their hospital presentation will be sent information regarding the trial and how to contact the CPHB lymphoedema service if they would like to learn more information or self-refer. To recruit from the community, the study will be advertised via posters, radio and articles in various magazines and newspapers, providing information about the trial and encouraging self-referral. Education (in-services, faxes, newsletters, posters) and referral forms will be provided to recruitment sites (Canberra Hospital, CPHB, General Practices

## Research Proposal

E.Webb

1  
2  
3 within the surrounding region) to encourage health professionals to refer patients. Patients from these  
4 sites must consent to referral to the CPHB lymphoedema service for the study, but do not need to  
5 consent to participating in the trial at time of referral.  
6  
7  
8

9 After self-referral, a screening phone call will be conducted to check inclusion/exclusion criteria, and  
10 for those that appear to be eligible, an appointment at the service will be made with a lymphoedema  
11 therapist. At this appointment candidates will be provided with participant information and consent  
12 forms, a verbal explanation of the study and an opportunity to ask questions, prior to choosing to  
13 consent or decline to participate.  
14  
15  
16  
17

18 To promote participation in the study, a free set of compression garments will be offered by a  
19 secondary sponsor. Compression garments are expensive, which can provide a barrier to treatment  
20 compliance. Participants in the intervention group will receive the free garments at intervention  
21 commencement. Participants in the control group will receive the free garments following their first  
22 cellulitis recurrence (cross-over) or upon study completion for those who do not experience  
23 recurrence.  
24  
25  
26  
27  
28  
29  
30  
31  
32  
33  
34  
35  
36  
37  
38  
39  
40  
41  
42  
43  
44  
45  
46  
47  
48  
49  
50  
51  
52  
53  
54  
55  
56  
57  
58  
59  
60

## Research Proposal

E.Webb

Table 1: Timeline per patient for RCT outcome measures

| Time Point                                                                                                            | Enrolment | Assessment post initial intervention | Assessment post cellulitis recurrence | Cross-over | 6 | 12 | 18 | 24 | 30 | 36 |
|-----------------------------------------------------------------------------------------------------------------------|-----------|--------------------------------------|---------------------------------------|------------|---|----|----|----|----|----|
| <i>Body Mass Index</i>                                                                                                | X         |                                      | X                                     | X          | X | X  | X  | X  | X  | X  |
| <u>Perometer (limb volume)</u>                                                                                        | X         | X                                    | X                                     | X          | X | X  | X  | X  | X  | X  |
| <u>Summated Limb Circumferences</u>                                                                                   | X         | X                                    | X                                     | X          | X | X  | X  | X  | X  | X  |
| <u>ED-5D-3L</u>                                                                                                       | X         |                                      |                                       |            |   | X  |    | X  |    | X  |
| <u>LYMQOL</u>                                                                                                         | X         |                                      |                                       |            | X | X  |    | X  |    | X  |
| <u>Cellulitis recurrence date/s</u>                                                                                   |           |                                      | X                                     |            | X | X  | X  | X  | X  | X  |
| <u>Hospitalisation due to cellulitis (date, length of stay)</u>                                                       |           |                                      | X                                     |            | X | X  | X  | X  | X  | X  |
| Verification of cellulitis recurrence and associated hospitalisation using medical record/general practitioner report |           |                                      | X                                     |            | X | X  | X  | X  | X  | X  |
| Intervention provided (type of garment, application of compression bandages)                                          |           | X                                    | X                                     | X          | X | X  | X  | X  | X  | X  |
| <i>Presence of fungal infections/tinea/maceration or cracking of skin between toes</i>                                |           |                                      | X                                     |            | X | X  | X  | X  | X  | X  |
| Adverse events                                                                                                        |           |                                      | X                                     |            | X | X  | X  | X  | X  | X  |
| Intervention compliance                                                                                               |           |                                      | X                                     |            | X | X  | X  | X  | X  | X  |
| <i>Occurrence of wounds/ulcers (acute/chronic)</i>                                                                    |           |                                      |                                       |            | X | X  | X  | X  | X  | X  |

Research Proposal

E.Webb

1  
2  
3  
4  
5  
6  
7  
8  
9  
10  
11  
12  
13  
14  
15  
16  
17  
18  
19  
20  
21  
22  
23  
24  
25  
26  
27  
28  
29  
30  
31  
32  
33  
34  
35  
36  
37  
38  
39  
40  
41  
42  
43  
44  
45  
46

Primary and secondary outcome measures have been underlined. Identified potential risk factors have been italicised.<sup>3 10</sup>

For peer review only

## Research Proposal

E.Webb

### Assignment of interventions and blinding

Participants will be assigned to the intervention or control group in a 1:1 allocation ratio using block randomisation, with a block size of 10. Sealed sequentially numbered opaque envelopes will be used to ensure concealed allocation. A computer-generated allocation sequence will be created and supplied by a consultant statistician and saved in a folder only accessible by administration staff.

Administration staff will prepare the sealed sequentially numbered opaque envelopes, ensuring therapists involved in participant allocation have no premature access to the letters.

Therapists will not be blinded due to practicalities of providing the intervention within a small team of 4 specialised clinicians. Further, the visible nature of the treatment and lack of feasible sham interventions prevent effective blinding of both assessors and participants. Additionally, for ethical reasons, participants will be fully informed of both the potential interventions, prior to consenting to participate.

### Data management and quality assurance

Prior to any involvement in the trial, therapists will receive training regarding trial implementation and completion of outcome measures. Refresher training will be provided to therapists annually and the trial protocol will be kept readily available.

For the duration of the study, data will be stored in identifiable form in both a locked office and on a secure access hard drive, accessible only by designated research staff. Data will be entered by a research officer or members of the research team. For quality assurance, data completeness will be reviewed annually, and all entered data will be cross-checked against written records at least once after initial entry. Following trial conclusion and prior to data analysis, all data will be de-identified. Data will be stored for a minimum of 7 years as per CPHB policy, however data may be retained for longer for identified new, ethically approved ancillary studies. A contract with the secondary sponsor ensures they will have no involvement in the study design, in the collection, analysis, and interpretation of data, in the writing of the manuscript, or in the decision to submit the manuscript for publication.

### Participant Retention

Once a participant is enrolled in the study, every effort will be made to ensure they are followed up as per the protocol. Where participants cannot attend a scheduled appointment, a phone call assessment may be completed to gain the primary outcome measure. Phone call assessment will not allow for completion of limb volume or QOL measures but will capture date of cellulitis recurrence and cellulitis-related hospitalisation.



## Research Proposal

E.Webb

Participants can withdraw from the study at any point. For participants that withdraw, the medical record and/or general practitioner report may be checked according to the schedule for cellulitis recurrence and cellulitis-related hospitalisation.

### **Termination criteria**

Participants will be withdrawn from the study in the case of death, withdrawal of consent or if they develop a wound or lymphorrhoea requiring compression for effective management<sup>30</sup>.

### **Proposed methods for data analysis**

For the main outcome measure of 'time to first episode of recurrent cellulitis', survival analysis will be undertaken. Kaplan-Meier plots will be used to visualise patterns of time to first cellulitis recurrence between the groups, with a log rank test being used to determine if there is a statistically significant difference between the groups. Cox proportional hazards regression may also be used to adjust for important risk factors. Right censoring will be used for participants who are lost to follow up. Intention to treat analysis will be used, with all enrolled participants being assessed according to their randomisation, regardless of protocol adherence.

For the secondary outcomes of percent change in limb volume and QOL, measures will be taken at multiple time points. Therefore, groups will be compared using a linear mixed model or using a repeated measures analysis. A generalized linear model will be used to assess rate of cellulitis-related hospital admissions.

### **MINIMISING BIAS**

#### **Selection and attrition bias**

Use of randomisation will minimise selection bias and confounding. Stratification will ensure use of prophylactic antibiotics is not confounded with treatment assignment. Presence and distribution of other known potential confounding factors will be measured and reported. Intention to treat analysis will be used to prevent attrition bias that may occur through loss to follow up of participants.

#### **Internal validity**

Use of an RCT and validated measurement tools support the internal validity of this research. The lack of blinding of therapists and participants has the potential to induce surveillance and recall bias and lead to differential measurement error in the reporting of cellulitis recurrence. To minimise this, accuracy of self-report of recurrence may be cross-checked with the participant's general practitioner or medical record (from CPHB and Canberra Hospital). Diagnosis of cellulitis by doctors external to the study and use of perometry to measure limb volume will reduce the risk of measurement bias and

## Research Proposal

E.Webb

thus differential measurement error. Calibration of the perometer will be performed to prevent non-differential measurement error that could result from machine error.

Control and intervention group participants have the same appointment schedule throughout the duration of the trial, however participants in the intervention group may attend more appointments than the control group. This systematic difference in clinician contact could influence participant's perceived benefit, allowing potential bias in self-reported measures (LYMQOL, EQ-5D).

### ANALYSIS OF COSTS

A within-trial cost-analysis assessment will be conducted. Data obtained from the trial and participant medical records will be used to assess the cost of oedema management and the cost of an episode of cellulitis from both an individual and a health systems perspective. Upon completion of the RCT, the cost-effectiveness and cost-utility of chronic oedema management to prevent recurrent cellulitis may be assessed.

### ETHICS AND DISSEMINATION

Ethics approval has been granted for these studies by three institutional committees:

1. Calvary Public Hospital Bruce Human Research Ethics Committee ETH.4.17.092
2. Australian Capital Territory Health Human Research Ethics Committee (53-2016)
3. University of Canberra Human Research Ethics Committee (cross-institutional approval)

Regardless of the outcome of the trial, the findings are planned to be submitted for publication in relevant peer-reviewed journals and for presentations at national and international conferences. Key findings will be disseminated to identified stakeholders, including primary contact clinicians for patients experiencing cellulitis (doctors and health professionals in acute and community settings), clinicians who manage chronic oedema and professionals who may be involved in developing relevant policy and practice.

### DISCUSSION

Although current expert consensus recommends compression therapy to prevent the recurrence of cellulitis in patients with lower limb chronic oedema, the evidence supporting this recommendation is lacking. This study aims to review the efficacy of compression therapy to allow for better informed practice and policy. Given the high incidence of cellulitis within Australia and around the world, reducing cellulitis recurrence will significantly decrease cost to the healthcare system and reduce financial and personal burden of sufferers. Further, should compression therapy reduce the recurrence of cellulitis this may limit the dependence and widespread prescription of prophylactic antibiotics.

## Research Proposal

E.Webb

This trial will be performed on adults receiving healthcare services in the Australian Capital Territory, however the results will be relevant to cellulitis management throughout Australia and internationally.

**Author affiliations**

1. Physiotherapy Department, Calvary Public Hospital Bruce, Canberra, Australian Capital Territory, Australia
2. Discipline of Physiotherapy, Faculty of Health, University of Canberra, Canberra, Australian Capital Territory, Australia
3. Statistical Consulting Unit, Australian National University, Canberra, Australian Capital Territory, Australia
4. University of Canberra Research Institute for Sport and Exercise (UC-RISE), Canberra, Australia.
5. Medical Stream, Calvary Public Hospital Bruce, Canberra, Australian Capital Territory, Australia
6. Infectious Diseases Unit, Canberra Hospital, Canberra, Australian Capital Territory, Australia
7. Medical School, Australian National University, Canberra, Australian Capital Territory, Australia
8. Australian Institute of Health Innovation, Macquarie University, Sydney, New South Wales, Australia.

**Acknowledgements** The Calvary Public Hospital Bruce Lymphoedema Team, specifically Gemma Arnold, Marie-Michelle Coulombe, Ingrid Thé, Abby Benton, Emma May, Sarah Squires, Caitlin Norris, Nievelle Chand, Sarah Toohey, Ashlee Cashion and Bhavleen Singh.

**Author contributions** EW: trial design and implementation, contribution of original material, editing and approval of final manuscript. BB: trial implementation support and contribution of original material. TN: trial design input and statistical support. VM: economic analysis support. BB, TN, JG, FB and VM provided supervision, contributed to refinement of the protocol, and approved the final manuscript.

**Funding** Calvary Public Hospital Bruce is the primary sponsor, funding clinician time to initiate and manage the trial. Haddenham Healthcare is a secondary sponsor, providing two sets of free compression garments for each trial participant. Haddenham Healthcare had no role in designing this study, and will not be involved in the trial implementation, analyses, data interpretation, or publication or dissemination of results. Haddenham Healthcare will not have access to trial data.

## Research Proposal

E.Webb

1  
2  
3 **Competing interests** None

4 **Ethics approval** The Human Research Ethics Committees of Calvary Public Hospital Bruce,  
5  
6 Australian Capital Territory Health and University of Canberra all approved this trial.  
7

8 **Provenance and peer review** Not commissioned; externally peer reviewed

9 **Trial status** The ICTOC trial is currently in progress. Participant recruitment started in May 2017 and  
10  
11 is expected to continue until December 2019.  
12  
13  
14  
15  
16  
17  
18  
19  
20  
21  
22  
23  
24  
25  
26  
27  
28  
29  
30  
31  
32  
33  
34  
35  
36  
37  
38  
39  
40  
41  
42  
43  
44  
45  
46  
47  
48  
49  
50  
51  
52  
53  
54  
55  
56  
57  
58  
59  
60

For peer review only

## REFERENCES

1. Swartz MN. Clinical practice. Cellulitis. *N Engl J Med* 2004;350(9):904-12. doi: 10.1056/NEJMcp031807
2. Eriksson B, Jorup-Rönström C, Karkkonen K, et al. Erysipelas: clinical and bacteriologic spectrum and serological aspects. *Clin Infect Dis* 1996;23(5):1091-98.
3. Pavlotsky F, Amrani S, Trau H. Recurrent erysipelas: risk factors. *JDDG* 2004;2(2):89-95.
4. Inghammar M, Rasmussen M, Linder A. Recurrent erysipelas-risk factors and clinical presentation. *BMC Infect Dis* 2014;14:270-70. doi: 10.1186/1471-2334-14-270
5. The Australian Commission on Safety and Quality in Healthcare. Australian Atlas of Healthcare Variation 2017, 2017:81-90.
6. National Health Performance Authority. Healthy Communities: Potentially preventable hospitalisations in 2013–14, 2015
7. National Health Performance Authority. Hospital Performance: Costs of acute admitted patients in public hospitals in 2011–12, 2015.
8. Cox NH. Oedema as a risk factor for multiple episodes of cellulitis/erysipelas of the lower leg: a series with community follow-up. *Br J Dermatol* 2006;155(5):947-50. doi: doi:10.1111/j.1365-2133.2006.07419.x
9. Jorup-Ronstrom C, Britton S. Recurrent erysipelas: predisposing factors and costs of prophylaxis. *Infection* 1987;15(2):105-6.
10. Dupuy A, Benchikhi H, Roujeau JC, et al. Risk factors for erysipelas of the leg (cellulitis): case-control study. *BMJ* 1999;318(7198):1591-4.
11. Karpelin M, Siljander T, Vuopio-Varkila J, et al. Factors predisposing to acute and recurrent bacterial non-necrotizing cellulitis in hospitalized patients: a prospective case-control study. *Clin Microbiol Infect* 2010;16(6):729-34. doi: 10.1111/j.1469-0691.2009.02906.x
12. National Lymphoedema Partnership. Consensus Statement on the Chronic Oedema – Lymphoedema Interface. <https://www.lympho.org/portfolio/consensus-statement-on-the-chronic-oedema-lymphoedema-interface/> (accessed September 2018).
13. Chlebicki MP, Oh CC. Recurrent cellulitis: risk factors, etiology, pathogenesis and treatment. *Curr Infect Dis Rep* 2014;16(9):422. doi: 10.1007/s11908-014-0422-0
14. Todd M. Chronic oedema: impact and management. *Br J Nurs* 2013;22(11):623-7. doi: 10.12968/bjon.2013.22.11.623
15. Cox NH, Colver GB, Paterson WD. Management and morbidity of cellulitis of the leg. *J R Soc Med* 1998;91(12):634-7.
16. Arsenault K, Rielly L, Wise H. Effects of Complete Decongestive Therapy on the Incidence Rate of Hospitalization for the Management of Recurrent Cellulitis in Adults with Lymphedema. *Rehabil Oncol* 2011;29(3):14-20.
17. Ko DS, Lerner R, Klose G, et al. Effective treatment of lymphedema of the extremities. *Arch Surg* 1998;133(4):452-8.
18. Dalal A, Eskin-Schwartz M, Mimouni D, et al. Interventions for the prevention of recurrent erysipelas and cellulitis. *Cochrane Database of Systematic Reviews* 2017; (6).
19. Australasian Lymphology Association. About the National Lymphoedema Practitioners Register [Website]. 2018. <http://www.lymphoedema.org.au/the-register-updated/> (accessed September 2018).
20. Carratala J, Roson B, Fernandez-Sabe N, et al. Factors associated with complications and mortality in adult patients hospitalized for infectious cellulitis. *Eur J Clin Microbiol Infect Dis* 2003;22(3):151-7. doi: 10.1007/s10096-003-0902-x
21. Nassaji M, Ghorbani R, Ghashghaee S. Risk factors of acute cellulitis in adult patients: A case-control study. *EJM* 2016;21(1):26-30. doi: 10.5505/ejm.2016.95605
22. Man IO, Markland KL, Morrissey MC. The validity and reliability of the Perometer in evaluating human knee volume. *Clin Physiol Funct Imaging* 2004;24(6):352-8. doi: 10.1111/j.1475-097X.2004.00577.x

## Research Proposal

E.Webb

23. Czerniec S, Ward L, Lee M-J, et al. Segmental measurement of breast cancer-related arm lymphoedema using perometry and bioimpedance spectroscopy. *Support Care Cancer* 2010;19:703-10. doi: 10.1007/s00520-010-0896-8
24. Czerniec SA, Ward LC, Refshauge KM, et al. Assessment of breast cancer-related arm lymphedema-comparison of physical measurement methods and self-report. *Cancer Invest* 2010;28(1):54-62. doi: 10.3109/07357900902918494
25. Bulley C, Coutts F, Tan C-W. Perometry limb volume measurement: Protocol development and reliability *Eur J Physiother* 2013;15(4) doi: 10.3109/21679169.2013.831482
26. Devoogdt N, Lemkens H, Geraerts I, et al. A new device to measure upper limb circumferences: validity and reliability. *Int Angiol* 2010;29(5):401-7.
27. Keeley V, Crooks S, Locke J, et al. A quality of life measure for limb lymphoedema (LYMQOL). *J lymphoedema* 2010;5:26-37.
28. Yang Y, Brazier J, Longworth L. EQ-5D in skin conditions: an assessment of validity and responsiveness. *Eur J Health Econ* 2015;16(9):927-39. doi: 10.1007/s10198-014-0638-9
29. R Core Team. R: A language and environment for statistical computing: R Foundation for Statistical Computing, Vienna, Austria; 2018. <https://www.R-project.org/> (accessed December 2018).
30. O'Meara S, Cullum N, Nelson EA, et al. Compression for venous leg ulcers. *Cochrane Database of Systematic Reviews* 2012(11) doi: 10.1002/14651858.CD000265.pub3

Figure 1: Anticipated participant flow through trial.

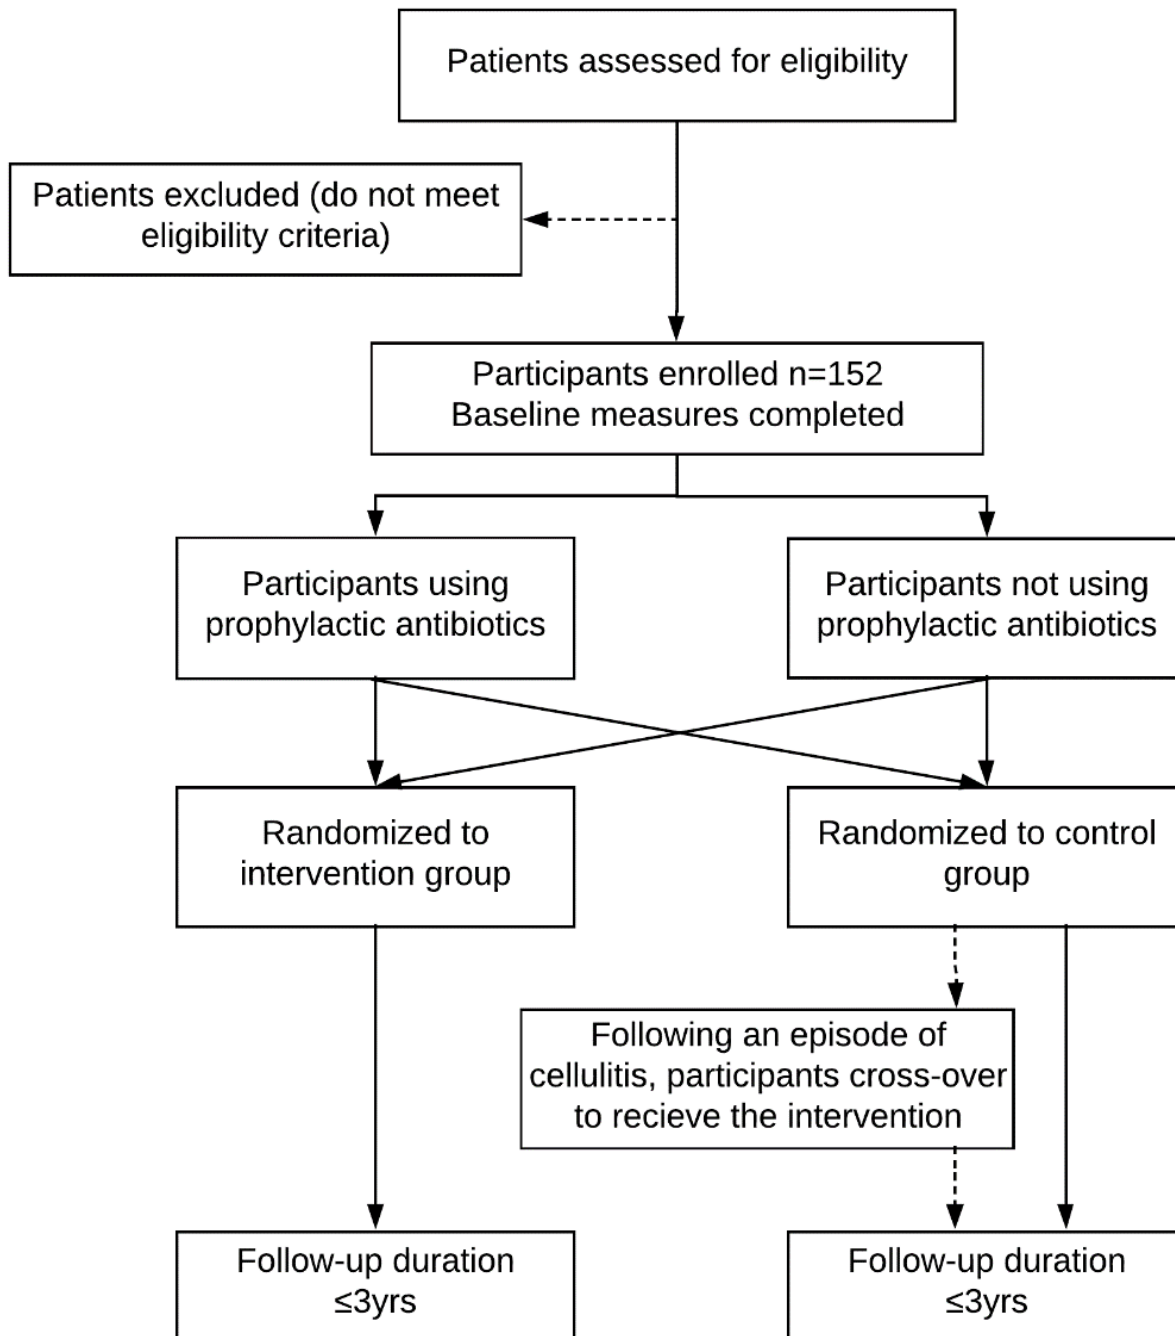

# Reporting checklist for protocol of a clinical trial.

Based on the SPIRIT guidelines.

## Instructions to authors

Complete this checklist by entering the page numbers from your manuscript where readers will find each of the items listed below.

Your article may not currently address all the items on the checklist. Please modify your text to include the missing information. If you are certain that an item does not apply, please write "n/a" and provide a short explanation.

Upload your completed checklist as an extra file when you submit to a journal.

In your methods section, say that you used the SPIRIT reporting guidelines, and cite them as:

Chan A-W, Tetzlaff JM, Altman DG, Laupacis A, Gøtzsche PC, Krleža-Jerić K, Hróbjartsson A, Mann H, Dickersin K, Berlin J, Doré C, Parulekar W, Summerskill W, Groves T, Schulz K, Sox H, Rockhold FW, Rennie D, Moher D. SPIRIT 2013 Statement: Defining standard protocol items for clinical trials. *Ann Intern Med.* 2013;158(3):200-207

|                    |                     | Reporting Item                                                                                               | Page Number |
|--------------------|---------------------|--------------------------------------------------------------------------------------------------------------|-------------|
| Title              | <a href="#">#1</a>  | Descriptive title identifying the study design, population, interventions, and, if applicable, trial acronym | 1           |
| Trial registration | <a href="#">#2a</a> | Trial identifier and registry name. If not yet registered, name of intended registry                         | 2           |



|    |                     |                     |                                                         |       |
|----|---------------------|---------------------|---------------------------------------------------------|-------|
| 1  | Trial registration: | <a href="#">#2b</a> | All items from the World Health Organization Trial      | NA    |
| 2  |                     |                     |                                                         |       |
| 3  | data set            |                     | Registration Data Set                                   |       |
| 4  |                     |                     |                                                         |       |
| 5  |                     |                     |                                                         |       |
| 6  | Protocol version    | <a href="#">#3</a>  | Date and version identifier                             | 2     |
| 7  |                     |                     |                                                         |       |
| 8  |                     |                     |                                                         |       |
| 9  | Funding             | <a href="#">#4</a>  | Sources and types of financial, material, and other     | 16    |
| 10 |                     |                     | support                                                 |       |
| 11 |                     |                     |                                                         |       |
| 12 |                     |                     |                                                         |       |
| 13 |                     |                     |                                                         |       |
| 14 |                     |                     |                                                         |       |
| 15 | Roles and           | <a href="#">#5a</a> | Names, affiliations, and roles of protocol contributors | 16    |
| 16 |                     |                     |                                                         |       |
| 17 | responsibilities:   |                     |                                                         |       |
| 18 |                     |                     |                                                         |       |
| 19 | contributorship     |                     |                                                         |       |
| 20 |                     |                     |                                                         |       |
| 21 |                     |                     |                                                         |       |
| 22 |                     |                     |                                                         |       |
| 23 | Roles and           | <a href="#">#5b</a> | Name and contact information for the trial sponsor      | 1,16  |
| 24 |                     |                     |                                                         |       |
| 25 | responsibilities:   |                     |                                                         |       |
| 26 |                     |                     |                                                         |       |
| 27 | sponsor contact     |                     |                                                         |       |
| 28 |                     |                     |                                                         |       |
| 29 | information         |                     |                                                         |       |
| 30 |                     |                     |                                                         |       |
| 31 |                     |                     |                                                         |       |
| 32 | Roles and           | <a href="#">#5c</a> | Role of study sponsor and funders, if any, in study     | 13,16 |
| 33 |                     |                     |                                                         |       |
| 34 | responsibilities:   |                     | design; collection, management, analysis, and           |       |
| 35 |                     |                     |                                                         |       |
| 36 | sponsor and funder  |                     | interpretation of data; writing of the report; and the  |       |
| 37 |                     |                     |                                                         |       |
| 38 |                     |                     |                                                         |       |
| 39 |                     |                     |                                                         |       |
| 40 |                     |                     |                                                         |       |
| 41 |                     |                     |                                                         |       |
| 42 |                     |                     |                                                         |       |
| 43 |                     |                     |                                                         |       |
| 44 |                     |                     |                                                         |       |
| 45 |                     |                     |                                                         |       |
| 46 |                     |                     |                                                         |       |
| 47 | Roles and           | <a href="#">#5d</a> | Composition, roles, and responsibilities of the         | 10    |
| 48 |                     |                     |                                                         |       |
| 49 | responsibilities:   |                     | coordinating centre, steering committee, endpoint       |       |
| 50 |                     |                     |                                                         |       |
| 51 | committees          |                     | adjudication committee, data management team, and       |       |
| 52 |                     |                     |                                                         |       |
| 53 |                     |                     |                                                         |       |
| 54 |                     |                     |                                                         |       |
| 55 |                     |                     |                                                         |       |
| 56 |                     |                     |                                                         |       |
| 57 |                     |                     |                                                         |       |
| 58 |                     |                     |                                                         |       |
| 59 |                     |                     |                                                         |       |
| 60 |                     |                     |                                                         |       |

|    |                      |                                                                             |     |
|----|----------------------|-----------------------------------------------------------------------------|-----|
| 1  |                      | applicable (see Item 21a for data monitoring                                |     |
| 2  |                      | committee)                                                                  |     |
| 3  |                      |                                                                             |     |
| 4  |                      |                                                                             |     |
| 5  |                      |                                                                             |     |
| 6  | Background and       | <a href="#">#6a</a> Description of research question and justification for  | 4   |
| 7  | rationale            | undertaking the trial, including summary of relevant                        |     |
| 8  |                      | studies (published and unpublished) examining                               |     |
| 9  |                      | benefits and harms for each intervention                                    |     |
| 10 |                      |                                                                             |     |
| 11 |                      |                                                                             |     |
| 12 |                      |                                                                             |     |
| 13 |                      |                                                                             |     |
| 14 |                      |                                                                             |     |
| 15 | Background and       | <a href="#">#6b</a> Explanation for choice of comparators                   | 4,5 |
| 16 | rationale: choice of |                                                                             |     |
| 17 | comparators          |                                                                             |     |
| 18 |                      |                                                                             |     |
| 19 |                      |                                                                             |     |
| 20 |                      |                                                                             |     |
| 21 |                      |                                                                             |     |
| 22 |                      |                                                                             |     |
| 23 | Objectives           | <a href="#">#7</a> Specific objectives or hypotheses                        | 5   |
| 24 |                      |                                                                             |     |
| 25 |                      |                                                                             |     |
| 26 | Trial design         | <a href="#">#8</a> Description of trial design including type of trial (eg, | 5,6 |
| 27 |                      | parallel group, crossover, factorial, single group),                        |     |
| 28 |                      | allocation ratio, and framework (eg, superiority,                           |     |
| 29 |                      | equivalence, non-inferiority, exploratory)                                  |     |
| 30 |                      |                                                                             |     |
| 31 |                      |                                                                             |     |
| 32 |                      |                                                                             |     |
| 33 |                      |                                                                             |     |
| 34 |                      |                                                                             |     |
| 35 |                      |                                                                             |     |
| 36 | Study setting        | <a href="#">#9</a> Description of study settings (eg, community clinic,     | 7   |
| 37 |                      | academic hospital) and list of countries where data                         |     |
| 38 |                      | will be collected. Reference to where list of study sites                   |     |
| 39 |                      | can be obtained                                                             |     |
| 40 |                      |                                                                             |     |
| 41 |                      |                                                                             |     |
| 42 |                      |                                                                             |     |
| 43 |                      |                                                                             |     |
| 44 |                      |                                                                             |     |
| 45 |                      |                                                                             |     |
| 46 | Eligibility criteria | <a href="#">#10</a> Inclusion and exclusion criteria for participants. If   | 7   |
| 47 |                      | applicable, eligibility criteria for study centres and                      |     |
| 48 |                      | individuals who will perform the interventions (eg,                         |     |
| 49 |                      | surgeons, psychotherapists)                                                 |     |
| 50 |                      |                                                                             |     |
| 51 |                      |                                                                             |     |
| 52 |                      |                                                                             |     |
| 53 |                      |                                                                             |     |
| 54 |                      |                                                                             |     |
| 55 |                      |                                                                             |     |
| 56 |                      |                                                                             |     |
| 57 |                      |                                                                             |     |
| 58 |                      |                                                                             |     |
| 59 |                      |                                                                             |     |
| 60 |                      |                                                                             |     |

|    |                      |                      |                                                         |          |
|----|----------------------|----------------------|---------------------------------------------------------|----------|
| 1  | Interventions:       | <a href="#">#11a</a> | Interventions for each group with sufficient detail to  | 7,8      |
| 2  |                      |                      |                                                         |          |
| 3  | description          |                      | allow replication, including how and when they will be  |          |
| 4  |                      |                      |                                                         |          |
| 5  |                      |                      | administered                                            |          |
| 6  |                      |                      |                                                         |          |
| 7  |                      |                      |                                                         |          |
| 8  | Interventions:       | <a href="#">#11b</a> | Criteria for discontinuing or modifying allocated       | 6,8      |
| 9  |                      |                      |                                                         |          |
| 10 | modifications        |                      | interventions for a given trial participant (eg, drug   |          |
| 11 |                      |                      |                                                         |          |
| 12 |                      |                      | dose change in response to harms, participant           |          |
| 13 |                      |                      |                                                         |          |
| 14 |                      |                      | request, or improving / worsening disease)              |          |
| 15 |                      |                      |                                                         |          |
| 16 |                      |                      |                                                         |          |
| 17 |                      |                      |                                                         |          |
| 18 | Interventions:       | <a href="#">#11c</a> | Strategies to improve adherence to intervention         | 8, 11,12 |
| 19 |                      |                      |                                                         |          |
| 20 | adherence            |                      | protocols, and any procedures for monitoring            |          |
| 21 |                      |                      |                                                         |          |
| 22 |                      |                      | adherence (eg, drug tablet return; laboratory tests)    |          |
| 23 |                      |                      |                                                         |          |
| 24 |                      |                      |                                                         |          |
| 25 |                      |                      |                                                         |          |
| 26 | Interventions:       | <a href="#">#11d</a> | Relevant concomitant care and interventions that are    | 8        |
| 27 |                      |                      |                                                         |          |
| 28 | concomitant care     |                      | permitted or prohibited during the trial                |          |
| 29 |                      |                      |                                                         |          |
| 30 |                      |                      |                                                         |          |
| 31 | Outcomes             | <a href="#">#12</a>  | Primary, secondary, and other outcomes, including       | 9,12     |
| 32 |                      |                      |                                                         |          |
| 33 |                      |                      | the specific measurement variable (eg, systolic blood   |          |
| 34 |                      |                      |                                                         |          |
| 35 |                      |                      | pressure), analysis metric (eg, change from baseline,   |          |
| 36 |                      |                      |                                                         |          |
| 37 |                      |                      | final value, time to event), method of aggregation (eg, |          |
| 38 |                      |                      |                                                         |          |
| 39 |                      |                      | median, proportion), and time point for each outcome.   |          |
| 40 |                      |                      |                                                         |          |
| 41 |                      |                      | Explanation of the clinical relevance of chosen         |          |
| 42 |                      |                      |                                                         |          |
| 43 |                      |                      | efficacy and harm outcomes is strongly recommended      |          |
| 44 |                      |                      |                                                         |          |
| 45 |                      |                      |                                                         |          |
| 46 |                      |                      |                                                         |          |
| 47 |                      |                      |                                                         |          |
| 48 | Participant timeline | <a href="#">#13</a>  | Time schedule of enrolment, interventions (including    | 6,8,10   |
| 49 |                      |                      |                                                         |          |
| 50 |                      |                      | any run-ins and washouts), assessments, and visits      |          |
| 51 |                      |                      |                                                         |          |
| 52 |                      |                      | for participants. A schematic diagram is highly         |          |
| 53 |                      |                      |                                                         |          |
| 54 |                      |                      | recommended (see Figure)                                |          |
| 55 |                      |                      |                                                         |          |
| 56 |                      |                      |                                                         |          |
| 57 |                      |                      |                                                         |          |
| 58 |                      |                      |                                                         |          |
| 59 |                      |                      |                                                         |          |
| 60 |                      |                      |                                                         |          |

|    |                    |                      |                                                           |         |
|----|--------------------|----------------------|-----------------------------------------------------------|---------|
| 1  | Sample size        | <a href="#">#14</a>  | Estimated number of participants needed to achieve        | 10      |
| 2  |                    |                      | study objectives and how it was determined, including     |         |
| 3  |                    |                      | clinical and statistical assumptions supporting any       |         |
| 4  |                    |                      | sample size calculations                                  |         |
| 5  |                    |                      |                                                           |         |
| 6  |                    |                      |                                                           |         |
| 7  |                    |                      |                                                           |         |
| 8  |                    |                      |                                                           |         |
| 9  |                    |                      |                                                           |         |
| 10 |                    |                      |                                                           |         |
| 11 | Recruitment        | <a href="#">#15</a>  | Strategies for achieving adequate participant             | 10,11   |
| 12 |                    |                      | enrolment to reach target sample size                     |         |
| 13 |                    |                      |                                                           |         |
| 14 |                    |                      |                                                           |         |
| 15 |                    |                      |                                                           |         |
| 16 | Allocation:        | <a href="#">#16a</a> | Method of generating the allocation sequence (eg,         | 13      |
| 17 | sequence           |                      | computer-generated random numbers), and list of any       |         |
| 18 |                    |                      | factors for stratification. To reduce predictability of a |         |
| 19 | generation         |                      | random sequence, details of any planned restriction       |         |
| 20 |                    |                      | (eg, blocking) should be provided in a separate           |         |
| 21 |                    |                      | document that is unavailable to those who enrol           |         |
| 22 |                    |                      | participants or assign interventions                      |         |
| 23 |                    |                      |                                                           |         |
| 24 |                    |                      |                                                           |         |
| 25 |                    |                      |                                                           |         |
| 26 |                    |                      |                                                           |         |
| 27 |                    |                      |                                                           |         |
| 28 |                    |                      |                                                           |         |
| 29 |                    |                      |                                                           |         |
| 30 |                    |                      |                                                           |         |
| 31 |                    |                      |                                                           |         |
| 32 |                    |                      |                                                           |         |
| 33 | Allocation         | <a href="#">#16b</a> | Mechanism of implementing the allocation sequence         | 13      |
| 34 | concealment        |                      | (eg, central telephone; sequentially numbered,            |         |
| 35 |                    |                      | opaque, sealed envelopes), describing any steps to        |         |
| 36 | mechanism          |                      | conceal the sequence until interventions are assigned     |         |
| 37 |                    |                      |                                                           |         |
| 38 |                    |                      |                                                           |         |
| 39 |                    |                      |                                                           |         |
| 40 |                    |                      |                                                           |         |
| 41 |                    |                      |                                                           |         |
| 42 |                    |                      |                                                           |         |
| 43 | Allocation:        | <a href="#">#16c</a> | Who will generate the allocation sequence, who will       | 13, 7-8 |
| 44 | implementation     |                      | enrol participants, and who will assign participants to   |         |
| 45 |                    |                      | interventions                                             |         |
| 46 |                    |                      |                                                           |         |
| 47 |                    |                      |                                                           |         |
| 48 |                    |                      |                                                           |         |
| 49 |                    |                      |                                                           |         |
| 50 |                    |                      |                                                           |         |
| 51 | Blinding (masking) | <a href="#">#17a</a> | Who will be blinded after assignment to interventions     | 13      |
| 52 |                    |                      | (eg, trial participants, care providers, outcome          |         |
| 53 |                    |                      | assessors, data analysts), and how                        |         |
| 54 |                    |                      |                                                           |         |
| 55 |                    |                      |                                                           |         |
| 56 |                    |                      |                                                           |         |
| 57 |                    |                      |                                                           |         |
| 58 |                    |                      |                                                           |         |
| 59 |                    |                      |                                                           |         |
| 60 |                    |                      |                                                           |         |

|    |                       |                      |                                                              |       |
|----|-----------------------|----------------------|--------------------------------------------------------------|-------|
| 1  | Blinding (masking):   | <a href="#">#17b</a> | If blinded, circumstances under which unblinding is          | NA    |
| 2  |                       |                      |                                                              |       |
| 3  | emergency             |                      | permissible, and procedure for revealing a                   |       |
| 4  |                       |                      |                                                              |       |
| 5  | unblinding            |                      | participant's allocated intervention during the trial        |       |
| 6  |                       |                      |                                                              |       |
| 7  |                       |                      |                                                              |       |
| 8  | Data collection plan  | <a href="#">#18a</a> | Plans for assessment and collection of outcome,              | 13,9  |
| 9  |                       |                      |                                                              |       |
| 10 |                       |                      | baseline, and other trial data, including any related        |       |
| 11 |                       |                      |                                                              |       |
| 12 |                       |                      | processes to promote data quality (eg, duplicate             |       |
| 13 |                       |                      |                                                              |       |
| 14 |                       |                      | measurements, training of assessors) and a                   |       |
| 15 |                       |                      |                                                              |       |
| 16 |                       |                      | description of study instruments (eg, questionnaires,        |       |
| 17 |                       |                      |                                                              |       |
| 18 |                       |                      | laboratory tests) along with their reliability and validity, |       |
| 19 |                       |                      |                                                              |       |
| 20 |                       |                      | if known. Reference to where data collection forms           |       |
| 21 |                       |                      |                                                              |       |
| 22 |                       |                      | can be found, if not in the protocol                         |       |
| 23 |                       |                      |                                                              |       |
| 24 |                       |                      |                                                              |       |
| 25 |                       |                      |                                                              |       |
| 26 |                       |                      |                                                              |       |
| 27 |                       |                      |                                                              |       |
| 28 | Data collection plan: | <a href="#">#18b</a> | Plans to promote participant retention and complete          | 13-14 |
| 29 | retention             |                      | follow-up, including list of any outcome data to be          |       |
| 30 |                       |                      |                                                              |       |
| 31 |                       |                      | collected for participants who discontinue or deviate        |       |
| 32 |                       |                      |                                                              |       |
| 33 |                       |                      | from intervention protocols                                  |       |
| 34 |                       |                      |                                                              |       |
| 35 |                       |                      |                                                              |       |
| 36 |                       |                      |                                                              |       |
| 37 |                       |                      |                                                              |       |
| 38 | Data management       | <a href="#">#19</a>  | Plans for data entry, coding, security, and storage,         | 13    |
| 39 |                       |                      |                                                              |       |
| 40 |                       |                      | including any related processes to promote data              |       |
| 41 |                       |                      |                                                              |       |
| 42 |                       |                      | quality (eg, double data entry; range checks for data        |       |
| 43 |                       |                      |                                                              |       |
| 44 |                       |                      | values). Reference to where details of data                  |       |
| 45 |                       |                      |                                                              |       |
| 46 |                       |                      | management procedures can be found, if not in the            |       |
| 47 |                       |                      |                                                              |       |
| 48 |                       |                      | protocol                                                     |       |
| 49 |                       |                      |                                                              |       |
| 50 |                       |                      |                                                              |       |
| 51 |                       |                      |                                                              |       |
| 52 | Statistics: outcomes  | <a href="#">#20a</a> | Statistical methods for analysing primary and                | 14    |
| 53 |                       |                      |                                                              |       |
| 54 |                       |                      | secondary outcomes. Reference to where other                 |       |
| 55 |                       |                      |                                                              |       |
| 56 |                       |                      |                                                              |       |
| 57 |                       |                      |                                                              |       |
| 58 |                       |                      |                                                              |       |
| 59 |                       |                      |                                                              |       |
| 60 |                       |                      |                                                              |       |

1 details of the statistical analysis plan can be found, if  
 2  
 3 not in the protocol  
 4

5  
 6 Statistics: additional [#20b](#) Methods for any additional analyses (eg, subgroup 14  
 7 analyses and adjusted analyses)  
 8  
 9

10  
 11 Statistics: analysis [#20c](#) Definition of analysis population relating to protocol 14  
 12 population and non-adherence (eg, as randomised analysis), and any  
 13 missing data statistical methods to handle missing data (eg,  
 14 multiple imputation)  
 15  
 16  
 17  
 18  
 19  
 20

21 Data monitoring: [#21a](#) Composition of data monitoring committee (DMC); 10  
 22 formal committee summary of its role and reporting structure; statement  
 23 of whether it is independent from the sponsor and  
 24 competing interests; and reference to where further  
 25 details about its charter can be found, if not in the  
 26 protocol. Alternatively, an explanation of why a DMC  
 27 is not needed  
 28  
 29  
 30  
 31  
 32  
 33  
 34  
 35  
 36  
 37

38 Data monitoring: [#21b](#) Description of any interim analyses and stopping 10  
 39 interim analysis guidelines, including who will have access to these  
 40 interim results and make the final decision to  
 41 terminate the trial  
 42  
 43  
 44  
 45  
 46

47 Harms [#22](#) Plans for collecting, assessing, reporting, and 8  
 48 managing solicited and spontaneously reported  
 49 adverse events and other unintended effects of trial  
 50 interventions or trial conduct  
 51  
 52  
 53  
 54  
 55  
 56  
 57  
 58  
 59  
 60

|    |                    |                      |                                                         |          |
|----|--------------------|----------------------|---------------------------------------------------------|----------|
| 1  | Auditing           | <a href="#">#23</a>  | Frequency and procedures for auditing trial conduct, if | NA       |
| 2  |                    |                      | any, and whether the process will be independent        |          |
| 3  |                    |                      | from investigators and the sponsor                      |          |
| 4  |                    |                      |                                                         |          |
| 5  |                    |                      |                                                         |          |
| 6  |                    |                      |                                                         |          |
| 7  |                    |                      |                                                         |          |
| 8  |                    |                      |                                                         |          |
| 9  | Research ethics    | <a href="#">#24</a>  | Plans for seeking research ethics committee /           | 15       |
| 10 |                    |                      | institutional review board (REC / IRB) approval         |          |
| 11 | approval           |                      |                                                         |          |
| 12 |                    |                      |                                                         |          |
| 13 |                    |                      |                                                         |          |
| 14 | Protocol           | <a href="#">#25</a>  | Plans for communicating important protocol              | NA       |
| 15 |                    |                      | modifications (eg, changes to eligibility criteria,     |          |
| 16 | amendments         |                      | outcomes, analyses) to relevant parties (eg,            |          |
| 17 |                    |                      | investigators, REC / IRBs, trial participants, trial    |          |
| 18 |                    |                      | registries, journals, regulators)                       |          |
| 19 |                    |                      |                                                         |          |
| 20 |                    |                      |                                                         |          |
| 21 |                    |                      |                                                         |          |
| 22 |                    |                      |                                                         |          |
| 23 |                    |                      |                                                         |          |
| 24 |                    |                      |                                                         |          |
| 25 |                    |                      |                                                         |          |
| 26 | Consent or assent  | <a href="#">#26a</a> | Who will obtain informed consent or assent from         | 11       |
| 27 |                    |                      | potential trial participants or authorised surrogates,  |          |
| 28 |                    |                      | and how (see Item 32)                                   |          |
| 29 |                    |                      |                                                         |          |
| 30 |                    |                      |                                                         |          |
| 31 |                    |                      |                                                         |          |
| 32 |                    |                      |                                                         |          |
| 33 |                    |                      |                                                         |          |
| 34 | Consent or assent: | <a href="#">#26b</a> | Additional consent provisions for collection and use of | NA       |
| 35 | ancillary studies  |                      | participant data and biological specimens in ancillary  |          |
| 36 |                    |                      | studies, if applicable                                  |          |
| 37 |                    |                      |                                                         |          |
| 38 |                    |                      |                                                         |          |
| 39 |                    |                      |                                                         |          |
| 40 |                    |                      |                                                         |          |
| 41 |                    |                      |                                                         |          |
| 42 | Confidentiality    | <a href="#">#27</a>  | How personal information about potential and enrolled   | 13       |
| 43 |                    |                      | participants will be collected, shared, and maintained  |          |
| 44 |                    |                      | in order to protect confidentiality before, during, and |          |
| 45 |                    |                      | after the trial                                         |          |
| 46 |                    |                      |                                                         |          |
| 47 |                    |                      |                                                         |          |
| 48 |                    |                      |                                                         |          |
| 49 |                    |                      |                                                         |          |
| 50 |                    |                      |                                                         |          |
| 51 | Declaration of     | <a href="#">#28</a>  | Financial and other competing interests for principal   | NA (Page |
| 52 | interests          |                      | investigators for the overall trial and each study site | 17)      |
| 53 |                    |                      |                                                         |          |
| 54 |                    |                      |                                                         |          |
| 55 |                    |                      |                                                         |          |
| 56 |                    |                      |                                                         |          |
| 57 |                    |                      |                                                         |          |
| 58 |                    |                      |                                                         |          |
| 59 |                    |                      |                                                         |          |
| 60 |                    |                      |                                                         |          |

|    |                       |                      |                                                            |             |
|----|-----------------------|----------------------|------------------------------------------------------------|-------------|
| 1  | Data access           | <a href="#">#29</a>  | Statement of who will have access to the final trial       | 13          |
| 2  |                       |                      |                                                            |             |
| 3  |                       |                      | dataset, and disclosure of contractual agreements that     |             |
| 4  |                       |                      | limit such access for investigators                        |             |
| 5  |                       |                      |                                                            |             |
| 6  |                       |                      |                                                            |             |
| 7  |                       |                      |                                                            |             |
| 8  | Ancillary and post    | <a href="#">#30</a>  | Provisions, if any, for ancillary and post-trial care, and | NA          |
| 9  | trial care            |                      | for compensation to those who suffer harm from trial       |             |
| 10 |                       |                      | participation                                              |             |
| 11 |                       |                      |                                                            |             |
| 12 |                       |                      |                                                            |             |
| 13 |                       |                      |                                                            |             |
| 14 |                       |                      |                                                            |             |
| 15 |                       |                      |                                                            |             |
| 16 | Dissemination         | <a href="#">#31a</a> | Plans for investigators and sponsor to communicate         | 15          |
| 17 | policy: trial results |                      | trial results to participants, healthcare professionals,   |             |
| 18 |                       |                      | the public, and other relevant groups (eg, via             |             |
| 19 |                       |                      | publication, reporting in results databases, or other      |             |
| 20 |                       |                      | data sharing arrangements), including any publication      |             |
| 21 |                       |                      | restrictions                                               |             |
| 22 |                       |                      |                                                            |             |
| 23 |                       |                      |                                                            |             |
| 24 |                       |                      |                                                            |             |
| 25 |                       |                      |                                                            |             |
| 26 |                       |                      |                                                            |             |
| 27 |                       |                      |                                                            |             |
| 28 |                       |                      |                                                            |             |
| 29 |                       |                      |                                                            |             |
| 30 |                       |                      |                                                            |             |
| 31 | Dissemination         | <a href="#">#31b</a> | Authorship eligibility guidelines and any intended use     | 16          |
| 32 | policy: authorship    |                      | of professional writers                                    |             |
| 33 |                       |                      |                                                            |             |
| 34 |                       |                      |                                                            |             |
| 35 |                       |                      |                                                            |             |
| 36 | Dissemination         | <a href="#">#31c</a> | Plans, if any, for granting public access to the full      | NA          |
| 37 | policy: reproducible  |                      | protocol, participant-level dataset, and statistical code  | (Publishing |
| 38 | research              |                      |                                                            | protocol)   |
| 39 |                       |                      |                                                            |             |
| 40 |                       |                      |                                                            |             |
| 41 |                       |                      |                                                            |             |
| 42 |                       |                      |                                                            |             |
| 43 |                       |                      |                                                            |             |
| 44 | Informed consent      | <a href="#">#32</a>  | Model consent form and other related documentation         | NA (not     |
| 45 | materials             |                      | given to participants and authorised surrogates            | included in |
| 46 |                       |                      |                                                            | protocol)   |
| 47 |                       |                      |                                                            |             |
| 48 |                       |                      |                                                            |             |
| 49 |                       |                      |                                                            |             |
| 50 |                       |                      |                                                            |             |
| 51 | Biological            | <a href="#">#33</a>  | Plans for collection, laboratory evaluation, and storage   | NA          |
| 52 | specimens             |                      | of biological specimens for genetic or molecular           |             |
| 53 |                       |                      |                                                            |             |
| 54 |                       |                      |                                                            |             |
| 55 |                       |                      |                                                            |             |
| 56 |                       |                      |                                                            |             |
| 57 |                       |                      |                                                            |             |
| 58 |                       |                      |                                                            |             |
| 59 |                       |                      |                                                            |             |
| 60 |                       |                      |                                                            |             |



1 analysis in the current trial and for future use in

2  
3 ancillary studies, if applicable

4  
5  
6 The SPIRIT checklist is distributed under the terms of the Creative Commons Attribution License CC-  
7  
8 BY-ND 3.0. This checklist can be completed online using <https://www.goodreports.org/>, a tool made  
9  
10 by the [EQUATOR Network](#) in collaboration with [Penelope.ai](#)  
11  
12  
13  
14  
15  
16  
17  
18  
19  
20  
21  
22  
23  
24  
25  
26  
27  
28  
29  
30  
31  
32  
33  
34  
35  
36  
37  
38  
39  
40  
41  
42  
43  
44  
45  
46  
47  
48  
49  
50  
51  
52  
53  
54  
55  
56  
57  
58  
59  
60

# BMJ Open

## Impact of Compression Therapy on Cellulitis (ICTOC) in adults with chronic oedema: a randomised controlled trial protocol

|                                 |                                                                                                                                                                                                                                                                                                                                                                                                                                                                                                                           |
|---------------------------------|---------------------------------------------------------------------------------------------------------------------------------------------------------------------------------------------------------------------------------------------------------------------------------------------------------------------------------------------------------------------------------------------------------------------------------------------------------------------------------------------------------------------------|
| Journal:                        | <i>BMJ Open</i>                                                                                                                                                                                                                                                                                                                                                                                                                                                                                                           |
| Manuscript ID                   | bmjopen-2019-029225.R1                                                                                                                                                                                                                                                                                                                                                                                                                                                                                                    |
| Article Type:                   | Protocol                                                                                                                                                                                                                                                                                                                                                                                                                                                                                                                  |
| Date Submitted by the Author:   | 04-May-2019                                                                                                                                                                                                                                                                                                                                                                                                                                                                                                               |
| Complete List of Authors:       | Webb, Elizabeth; Calvary Public Hospital, Physiotherapy; University of Canberra, Faculty of Health<br>Neeman, Teresa; Australian National University, Biological Data Science Institute<br>Gaida, Jamie; University of Canberra Research Institute for Sport and Exercise (UC-RISE)<br>Bowden, Francis; Calvary Public Hospital Bruce; Australian National University<br>Mumford, Virginia; Macquarie University, Australian Institute of Health Innovation<br>Bissett, Bernie; University of Canberra, Faculty of Health |
| <b>Primary Subject Heading</b>: | Infectious diseases                                                                                                                                                                                                                                                                                                                                                                                                                                                                                                       |
| Secondary Subject Heading:      | Dermatology                                                                                                                                                                                                                                                                                                                                                                                                                                                                                                               |
| Keywords:                       | INFECTIOUS DISEASES, Cellulitis, Recurrence, Lymphedema, Edema, Compression Stockings                                                                                                                                                                                                                                                                                                                                                                                                                                     |
|                                 |                                                                                                                                                                                                                                                                                                                                                                                                                                                                                                                           |

SCHOLARONE™  
Manuscripts

**Title:** Impact of Compression Therapy on Cellulitis (ICTOC) in adults with chronic oedema: a randomised controlled trial protocol

**Authors:**

1. Elizabeth Webb, Physiotherapy Department, Calvary Public Hospital Bruce and University of Canberra, Canberra, Australia.
2. Teresa Neeman, Statistical Consulting Unit, Australian National University, Canberra, Australia.
3. Jamie Gaida, University of Canberra Research Institute for Sport and Exercise (UC-RISE), Canberra, Australia.
4. Francis J. Bowden, Calvary Public Hospital Bruce and Australian National University, Canberra, Australia.
5. Virginia Mumford, Australian Institute of Health Innovation, Macquarie University, Sydney, Australia.
6. Bernie Bissett, Faculty of Health, University of Canberra, Canberra, Australia.

**Correspondence:**

|             |                                                                                          |
|-------------|------------------------------------------------------------------------------------------|
| Name        | Elizabeth Webb                                                                           |
| Department  | Physiotherapy Department                                                                 |
| Institution | Calvary Public Hospital Bruce & University of Canberra                                   |
| Country     | Australia                                                                                |
| Address     | Physiotherapy Department, Calvary Public Hospital Bruce, Haydon Drive, Bruce<br>ACT 2617 |
| Tel         | +61 2 6201 6190                                                                          |
| Mob         | +61 412 959 294                                                                          |
| Fax         | +61 2 6201 6196                                                                          |
| Email       | elizabeth.webb@calvary-act.com.au                                                        |

**Key words:** cellulitis, recurrence, edema, lymphedema, compression stockings, physical therapy techniques

**Word Count:** (Abstract) 280  
(Body) 3857 (excluding table 1)

**References:** 29

**Tables:** 1

**Figures:** 1

**Competing interests:** Nil

- **Trial registration number:** ACTRN12617000412336 (Australia New Zealand Clinical Trials Registry)
- **Date Registered:** 22/03/2017

## ABSTRACT

**Introduction:** Cellulitis represents a significant burden to patients' quality of life and cost to the healthcare system, especially due to its recurrent nature. Chronic oedema is a strong risk factor for both an initial episode of cellulitis and cellulitis recurrence. Expert consensus advises compression therapy to prevent cellulitis recurrence in individuals with chronic oedema, however there is little supporting evidence. This research aims to determine if management of chronic oedema using compression therapy effectively delays recurrence of lower limb cellulitis.

**Methods and analysis:** A randomised controlled trial with cross-over will be used to assess the impact of compression therapy on clinical outcomes (time to next episode of cellulitis, rate of cellulitis-related hospital presentations, quality of life and leg volume). Using concealed allocation, 162 participants will be randomised into the intervention (compression) or control (no compression) group. Randomisation will be stratified by prophylactic antibiotic use. Participants will be followed up at 6 monthly intervals for up to 3 years, or until 45 episodes of cellulitis occur across the cohort. Following an episode of recurrent cellulitis, control group participants will cross-over to the intervention group. Survival analysis will be undertaken to assess the primary outcome measure of time to cellulitis recurrence. The hypotheses are that compression therapy to control lower limb chronic oedema will delay recurrent lower limb cellulitis, reduce the rate of associated hospitalisations, minimize affected limb volume and improve the quality of life of this population.

**Ethics and dissemination:** Ethics approval has been obtained from ethics committees of all relevant institutions. Results will be disseminated through relevant peer-reviewed journal articles and conference presentations.

**Trial registration number:** ACTRN12617000412336 (Australia New Zealand Clinical Trials Registry)

## ARTICLE SUMMARY

### Strengths and limitations of this study

- ICTOC is the first randomised controlled trial to assess whether management of chronic oedema using compression therapy will delay the recurrence of lower limb cellulitis. It will provide clinicians with new evidence regarding best practice management for the prevention of cellulitis.
- Randomisation of participants will be stratified by prophylactic antibiotic use to ensure antibiotic use does not confound treatment outcome.
- Due to the nature of the intervention, blinding is not feasible for participants or assessors.
- Assessment tools and methods (perometer, diagnosis of cellulitis by medical practitioners external to the trial, verification of data using the medical record or general practitioner) have been selected to minimise potential measurement bias.
- The use of broad inclusion criteria will allow for trial results to be generalised to adults across a range of settings nationally and internationally.

## Research Proposal

E.Webb

**BACKGROUND AND RATIONALE**

Cellulitis is a common acute bacterial infection of the skin and subcutaneous tissue.<sup>1</sup> The majority of cellulitis episodes (69-81%) occur in the lower limbs.<sup>2-4</sup> In Australia lower limb cellulitis is associated with significant health costs due to frequent hospital admissions and high levels of morbidity. In 2014-2015 there were 59,466 hospitalisations for cellulitis,<sup>5</sup> with the average admission lasting 4.3 days.<sup>6</sup> In 2013-2014 cellulitis was the third leading cause of potentially preventable hospital admissions, with over half of all admissions for cellulitis being considered potentially preventable.<sup>6,7</sup> Erysipelas is an infection similar to cellulitis, which typically affects more superficial tissues. As the terms erysipelas and cellulitis are often used interchangeably and most clinical studies do not differentiate between them, this paper will consider them as one entity.

Recurrence of cellulitis is common and represents a significant proportion of the disease burden. In a 3 year time frame cellulitis has been reported to recur in 29-47% of patients,<sup>8,9</sup> with a case series in Sweden finding that 13% of patients admitted for cellulitis developed two or more recurrences within 3 years.<sup>9</sup> In light of the significant recurrence rates, effective interventions which reduce recurrence could limit the disease burden and improve patient outcomes.

Oedema occurs when capillary filtration overwhelms the available lymphatic drainage<sup>10</sup>. Lymphoedema specifically refers to persistent oedema resulting from lymphatic drainage failure<sup>11</sup>. Chronic oedema is an umbrella term that refers to oedema resulting from insufficient lymphatic drainage, where the principle cause of the oedema may be increased capillary filtration and/or lymphatic drainage failure<sup>11</sup>. As such, the term chronic oedema encompasses oedema of various aetiologies, including lymphoedema. For the purpose of this trial, we will use the term chronic oedema.

Lymphoedema and chronic oedema are potent risk factors for developing lower limb cellulitis, and for its recurrence.<sup>4,8,12,13</sup> It is broadly accepted that the relationship between cellulitis and chronic oedema is a vicious cycle.<sup>8,14</sup> Chronic oedema predisposes individuals to cellulitis and with each episode of cellulitis, the lymphatic system is further impaired, increasing residual oedema and heightening risk of future cellulitis infections.<sup>14</sup> Thus chronic oedema is not only a result of cellulitis but also increases risk of recurrence.<sup>14</sup>

The standard treatment for chronic oedema includes compression therapy and skin care.<sup>15</sup> Compression bandaging can be used to reduce oedema in a limb, and daily wear of compression garments is used to control oedema. There is general consensus that in addition to antibiotic prescription, compression to manage oedema should be an adjuvant treatment for patients with

1  
2  
3 chronic oedema who are experiencing cellulitis recurrence.<sup>1 8 14 16</sup> Despite this common  
4 recommendation and the strong evidence supporting the relationship between oedema and cellulitis,  
5 there is a paucity of evidence to support the use of compression to manage chronic oedema to prevent  
6 cellulitis recurrence.  
7  
8  
9

10  
11 The time-intensive nature of compression therapy, and the fact that measuring meaningful outcomes  
12 requires lengthy assessment periods, probably contribute to the lack of research in this field. Only one  
13 study has been conducted on the impact of oedema management on cellulitis recurrence<sup>17</sup>, with a  
14 second study incidentally observing a reduction in 'infection' among patients receiving oedema  
15 management, although this was not a research objective.<sup>18</sup> While both studies support the hypothesis  
16 that oedema management decreases cellulitis recurrence, their conclusions are hampered by  
17 methodological limitations, including pre-post intervention methods, small sample sizes and change in  
18 infection rate not being specified a research objective.<sup>17 18</sup> Whilst research regarding compression  
19 therapy to prevent cellulitis recurrence is scarce, there is high quality evidence to support the use of  
20 prophylactic antibiotics. A multi-centre, double-blind, randomised controlled trial found that use of  
21 prophylactic antibiotics in patients experiencing recurrent cellulitis is effective in preventing  
22 subsequent attacks, although the effect diminishes following prophylaxis cessation.<sup>19</sup> A 2017  
23 Cochrane systematic review of interventions to prevent cellulitis identified 6 studies investigating  
24 prophylactic antibiotics, but no other randomised trials investigating other prophylactic measures such  
25 as oedema management or skin care.<sup>20</sup> Thus further research into the efficacy of prophylactic  
26 measures other than antibiotic, is warranted.<sup>20</sup>  
27  
28  
29  
30  
31  
32  
33  
34  
35  
36  
37

38 The following protocol describes a randomised controlled trial (RCT) with cross-over to determine if  
39 the use of compression therapy for adults experiencing lower limb recurrent cellulitis and chronic  
40 oedema will delay cellulitis recurrence.  
41  
42  
43

#### 44 **RESEARCH HYPOTHESES**

45 The hypotheses are that compression therapy to control lower limb chronic oedema will delay  
46 recurrent lower limb cellulitis, reduce the rate of associated hospitalisations, minimize affected limb  
47 volume and improve the quality of life of this population.  
48  
49  
50  
51

#### 52 **RESEARCH OBJECTIVES**

##### 53 **Primary objective**

54 To determine if compression therapy delays the recurrence of lower limb cellulitis in adults with  
55 lower limb chronic oedema and recurrent cellulitis.  
56  
57  
58  
59

##### 60 **Secondary Objectives**

**Research Proposal**

E.Webb

To determine if, in adults with lower limb chronic oedema and recurrent cellulitis, compression therapy; (1) reduces the rate of cellulitis-related hospital presentations; (2) reduces affected leg volume; and (3) improves quality of life (QOL).

**TRIAL DESIGN**

A randomised controlled trial with cross-over will be used to assess the impact of compression therapy on clinical outcomes (time to next episode of cellulitis, rate of cellulitis-related hospital presentations, QOL and leg volume). Participants will be randomised to the intervention or control group by block randomisation using sealed opaque envelopes. As prophylactic antibiotics have been shown to influence cellulitis recurrence,<sup>19-21</sup> randomisation of participants will be stratified by prophylactic antibiotic use. Following an episode of cellulitis, participants in the control group will cross-over into the intervention group, whereas intervention group participants will remain in their original group and continue to receive compression therapy. Figure 1 shows the proposed participant allocation process.

The absence of high-quality evidence regarding the impact of compression therapy on recurrence of cellulitis means there is uncertainty as to whether it is an effective intervention, justifying the use of an RCT. While there is no high-quality evidence to support use of the compression therapy to prevent cellulitis in this patient population, it reflects the accepted expert opinion and the standard clinical practice of the institution conducting the trial. Therefore, the trial design crosses the control group participants over into the intervention group following the first episode of cellulitis to ensure no participant continues to experience recurrent cellulitis episodes without receiving the institution's standard intervention.



1  
2  
3  
4  
5  
6  
7  
8  
9  
10  
11  
12  
13  
14  
15  
16  
17  
18  
19  
20  
21  
22  
23  
24  
25  
26  
27  
28  
29  
30  
31  
32  
33  
34  
35  
36  
37  
38  
39  
40  
41  
42  
43  
44  
45  
46  
47  
48  
49  
50  
51  
52  
53  
54  
55  
56  
57  
58  
59  
60

**Figure 1:** Anticipated participant flow through trial.

For peer review only

## Research Proposal

E.Webb

**METHODS****Study setting and population**

The trial will be conducted at the Calvary Public Hospital Bruce (CPHB) outpatient lymphoedema clinic. Adults with lower limb chronic oedema and a history of recurrent cellulitis who meet the eligibility criteria will be recruited from the two major ACT public Hospitals (CPHB and Canberra Hospital) and general practitioners servicing the ACT and nearby NSW residents.

**Eligibility criteria***Inclusion criteria*

- $\geq 18$  years of age
- $\geq 2$  episodes of cellulitis in the same leg in the past 2 years (at the time of referral)
- Chronic oedema (oedema persisting  $\geq 3$  months) in the leg/s that have had recurrent cellulitis diagnosed (presence of oedema confirmed by an accredited lymphoedema therapist through interview and physical examination, including a thorough medical history combined with limb palpation and visual assessment)
- Understanding of involvement in the study as per the participant information sheet
- Provision of informed consent
- Able to attend regular scheduled appointments for the duration of the study
- Has a valid Medicare number

*Exclusion criteria*

- Currently wearing effective compression garments ( $\geq$  compression class 2, or compression class 1 if considered effective by a lymphoedema therapist) regularly ( $\geq 5$  days per week)
- Declines to participate or is unable to participate for whatever reason
- Receiving end of life care
- Medically unstable
- Chronic wound/ulcer, or a wound/ulcer requiring specialist treatment or treatment that prevents the use of compression garments
- Unable to wear compression (unable to don/doff garments or has a medical condition that contraindicates use of compression)

**Interventions**

All assessments, interventions and outcome measures will be conducted by a physiotherapist or occupational therapist who meets the registration requirements for category one of the Australian National Lymphoedema Practitioners Register.<sup>22</sup>

## Research Proposal

E.Webb

1  
2  
3 At the initial appointment eligibility will be formally checked, and those who consent to participate  
4 will undergo stratified randomisation using sealed, opaque, and identical envelopes that are  
5 sequentially numbered. Prior to randomisation, baseline measures including number of episodes of  
6 cellulitis in the 2 years prior to referral, duration of chronic oedema, referral source and demographics  
7 will be captured. Presence of identified potential risk factors for cellulitis will also be recorded,  
8 including history of tinea or other fungal infections between toes, diabetes mellitus, obesity and  
9 chronic venous insufficiency.<sup>3 4 12 23 24</sup>  
10  
11  
12  
13  
14

15  
16 At the initial appointment participants in both the control and intervention groups will receive  
17 education (verbal and written) regarding cellulitis and how to decrease the risk of recurrence.  
18 Education will include the benefits of skin care, prevention of tinea or other fungal infections between  
19 toes, maintaining a healthy body weight and regular exercise.  
20  
21  
22

23  
24 For the intervention group, the initial appointment will also be used to plan appropriate compression  
25 therapy which will be provided at subsequent appointments. Compression therapy will involve  
26 application of compression garments (compression stockings or wraps) and may or may not involve  
27 compression bandaging to minimise oedema prior to fitting of compression garments. The number of  
28 appointments necessary for provision of compression therapy will be individualised to meet  
29 participant requirements.  
30  
31  
32

33  
34 Participants in both groups will be followed for up to 3 years at 6 monthly intervals (Table 1) to  
35 complete outcome measures and to continue to receive the allocated treatment (education with or  
36 without compression therapy). At each appointment the therapist will inform each participant of  
37 changes in their limb volume, providing tangible feedback to support ongoing participant attendance.  
38 Throughout the trial, participants in the intervention group may require additional appointments for  
39 compression therapy (compression bandaging, and measure for and provision of compression  
40 garments). Intervention compliance (number of days per week garments are worn) and adverse effects  
41 will be captured by self-report.  
42  
43  
44  
45  
46  
47  
48

49 Cross-over of control group participants will be triggered upon clinician identification of cellulitis.  
50 Recurrence of cellulitis will be checked at scheduled appointments, however if a participant reports a  
51 recurrence between scheduled assessments, they will be reviewed at an additional appointment to  
52 record outcome measures (table 1), and to commence cross-over for control group participants. Date  
53 of cross-over will be defined as the day compression garments are initially fitted.  
54  
55  
56  
57

### Outcome measures

58  
59 Table 1 shows the timeline for completion of trial activities and outcome measures.  
60

## Research Proposal

E.Webb

1  
2  
3  
4  
5 The primary outcome is 'observed time to first episode of cellulitis recurrence'. Cellulitis recurrence  
6 will only be assessed in a leg that has been assessed as having chronic oedema, thus if cellulitis occurs  
7 in a leg that was not previously identified as having chronic oedema, the infection will not be  
8 considered a recurrence. Cellulitis will be diagnosed by medical practitioners external to the study.  
9 Date of cellulitis recurrence (and associated hospitalisation) will be gained by participant self-report  
10 and may be verified using medical records from the hospitals and/or general practitioners.  
11  
12  
13  
14

15  
16 Secondary outcomes include: (1) rate of cellulitis-related hospital admissions; (2) percent change in  
17 leg volume from baseline, measured using the perometer; (3) QOL, assessed using the LYMQOL and  
18 EuroQol Five Dimension Scale (EQ-5D-3L). Occurrence of cellulitis-related hospital admissions will  
19 be measured in the same manner as cellulitis recurrence.  
20  
21  
22

23  
24 Percent change in leg volume will be measured using a perometer, an optoelectronic imaging device  
25 designed to measure limb volume.<sup>25</sup> The perometer has excellent intra-rater reliability (ICC= 1.0, 95%  
26 CI: 0.99 to 1.00) and inter-rater reliability (ICC= 1.0, 95% CI: 0.97 to 1.00), is sensitive to changes in  
27 limb volume,<sup>26-28</sup> and is a valid measure of knee volume.<sup>25</sup> Leg volume will be measured between  
28 53mm and 400mm height from the ground using the perometer. Monthly calibration of the perometer  
29 will be conducted using a standardised object of known volume (875ml) to minimise instrument error,  
30 ensuring consistency of this measurement device across the duration of the trial. Use of this device  
31 will also prevent potential differential measurement bias arising from lack of therapist blinding.  
32  
33  
34  
35  
36  
37

38 Where limb volume cannot be measured using the perometer, due to impaired mobility of a  
39 participant or equipment failure, summated circumferential leg measurements will be used following  
40 expert clinical guidelines. Circumferential leg measures will be taken at the mid foot, oblique ankle  
41 and at 10, 20, 30 and 40cm intervals up the leg using a measurement board. Circumferential limb  
42 measurement also has excellent intra-rater reliability (ICC=0.977-0.996, 95% CI: 0.960-0.998) and  
43 inter-rater reliability (ICC= 0.942- 0.994, 95% CI: 0.936-0.997).<sup>29</sup>  
44  
45  
46  
47  
48

49 Quality of life will be measured using LYMQOL, a validated, condition-specific quality of life tool  
50 for people with lower limb lymphoedema,<sup>30</sup> and the EQ-5D-3L, a generic preference-based measure  
51 of health related quality of life that comprises of five dimensions of health.<sup>31</sup> The EQ-5D can be used  
52 to calculate quality adjusted life years (QALYs) for the purpose of economic evaluation.<sup>31</sup> A  
53 systematic review has found the EQ-5D has good validity and responsiveness for people with skin  
54 diseases, although the tool has not been specifically validated within a population suffering  
55 cellulitis.<sup>31</sup>  
56  
57  
58  
59  
60

1  
2  
3 Exploratory analysis will be conducted to test the robustness of the trial hypotheses and may include  
4 assessment of cellulitis recurrence post cross-over, intervention compliance, participant  
5 demographics, risk factors, and per protocol analysis.  
6  
7  
8

### 9 **Sample size and duration of follow up**

10  
11 The sample size has been calculated for the primary objective of detecting a difference in time  
12 to cellulitis recurrence between the control and intervention groups. The sample size estimation is  
13 based upon the assumptions that the 3-year cellulitis recurrence rate in control participants  
14 is approximately 47%<sup>8</sup> and compression therapy will reduce the 3-year incidence of recurrent  
15 cellulitis by 50%.<sup>17 18</sup> Assuming that events occur at a constant rate, these assumptions correspond to a  
16 hazard ratio of 0.42. The eligibility criteria of two or more episodes of cellulitis in the same leg in the  
17 past 2 years has been used so that the trial cohort have an increased likelihood of cellulitis reoccurring  
18 during the follow up period.  
19  
20  
21  
22  
23

24  
25 It is assumed that patients will be recruited over a 2.5-year period, and the total study duration will be  
26 3.5 years. Length of participant follow up will vary based on time of enrolment. Using a sequential  
27 design software package gsDesign in R<sup>32</sup>, in order to detect a hazard ratio of 0.42 with 80% power and  
28 2.5% (1-sided) type 1 error, a total of 45 cellulitis recurrences are needed. Under the present  
29 recruitment and recurrence assumptions, we plan to recruit 162 participants (81 per arm).  
30  
31  
32  
33

34  
35 An interim analysis will be performed by a Data Monitoring Committee after 23 episodes of cellulitis.  
36 A log rank test will be used to assess group differences. If a nominal (1 sided) significance level of  
37  $p=0.003$  is detected, indicating a strong clinical effect, the study will be ceased. If the Data  
38 Monitoring Committee recommends that the study continue to 45 episodes of cellulitis, the final  
39 analysis will use a log rank test with (1-sided) significance level  $p=0.0238$ . These efficacy bounds  
40 were derived using a Hwang-Shih-DeCani spending function with  $\gamma = -4$  to preserve an overall  
41 Type I error rate of 5%.  
42  
43  
44  
45  
46

### 47 **Recruitment and enrolment of participants**

48  
49 Recruitment will be conducted over a 2.5-year period. A multi-faceted recruitment strategy will be  
50 used. In order to capture acute patients (seen in CPHB and Canberra Hospital emergency departments  
51 and wards), all patients diagnosed with lower limb cellulitis during their hospital presentation will be  
52 sent information regarding the trial and how to contact the CPHB lymphoedema service if they would  
53 like to learn more information or self-refer. To recruit from the community, the study will be  
54 advertised via posters, radio and articles in various magazines and newspapers, providing information  
55 about the trial and encouraging self-referral. Education (in-services, faxes, newsletters, posters) and  
56 referral forms will be provided to recruitment sites (Canberra Hospital, CPHB, General Practices  
57  
58  
59  
60

**Research Proposal**

E.Webb

1  
2  
3 within the surrounding region) to encourage health professionals to refer patients. Patients from these  
4 sites must consent to referral to the CPHB lymphoedema service for the study, but do not need to  
5 consent to participating in the trial at time of referral.  
6  
7

8  
9 After self-referral, a screening phone call will be conducted to check inclusion/exclusion criteria, and  
10 for those that appear to be eligible, an appointment at the service will be made with a lymphoedema  
11 therapist. At this appointment candidates will be provided with participant information and consent  
12 forms, a verbal explanation of the study and an opportunity to ask questions, prior to choosing to  
13 consent or decline to participate.  
14  
15  
16

17  
18 To promote participation in the study, a free set of compression garments will be offered by a  
19 secondary sponsor. Compression garments are expensive, which can provide a barrier to treatment  
20 compliance. Participants in the intervention group will receive the free garments at intervention  
21 commencement. Participants in the control group will receive the free garments following their first  
22 cellulitis recurrence (cross-over) or upon study completion for those who do not experience  
23 recurrence.  
24  
25  
26  
27  
28  
29

**Patient and Public Involvement:**

30  
31 A patient centred approach was utilised to design this study. The trial design replicates the institutions  
32 standard clinical practice as closely as possible, whilst aiming to minimise additional burden to  
33 participants. Patients from the participating clinical service were surveyed to assess acceptability of  
34 the model of care undertaken by the trial. As time required to attend appointments was identified as a  
35 potential burden, the trial was designed to minimise scheduled follow-up appointments. Cost of  
36 compression therapy was identified as a likely financial burden which is minimised through provision  
37 of two set of free compression garments and use of accessible funding schemes. Referral processes  
38 were developed to enable patients to self-refer to the trial. The cross-over design feature was chosen  
39 to ensure participants do not continue to experience episodes of recurrent cellulitis without receiving  
40 the institution's standard intervention.  
41  
42  
43  
44  
45  
46  
47  
48  
49  
50  
51  
52  
53  
54  
55  
56  
57  
58  
59  
60

Table 1: Timeline per patient for RCT outcome measures

| Time Point                                                                                                            | Enrolment | Assessment post initial intervention | Assessment post cellulitis recurrence | Cross-over | 6 | 12 | 18 | 24 | 30 | 36 |
|-----------------------------------------------------------------------------------------------------------------------|-----------|--------------------------------------|---------------------------------------|------------|---|----|----|----|----|----|
| <i>Body Mass Index</i>                                                                                                | X         |                                      | X                                     | X          | X | X  | X  | X  | X  | X  |
| <u>Perometer (limb volume)</u>                                                                                        | X         | X                                    | X                                     | X          | X | X  | X  | X  | X  | X  |
| <u>Summated Limb Circumferences</u>                                                                                   | X         | X                                    | X                                     | X          | X | X  | X  | X  | X  | X  |
| <u>ED-5D-3L</u>                                                                                                       | X         |                                      |                                       |            |   | X  |    | X  |    | X  |
| <u>LYMQOL</u>                                                                                                         | X         |                                      |                                       |            | X | X  |    | X  |    | X  |
| <u>Cellulitis recurrence date/s</u>                                                                                   |           |                                      | X                                     |            | X | X  | X  | X  | X  | X  |
| <u>Hospitalisation due to cellulitis (date, length of stay)</u>                                                       |           |                                      | X                                     |            | X | X  | X  | X  | X  | X  |
| Verification of cellulitis recurrence and associated hospitalisation using medical record/general practitioner report |           |                                      | X                                     |            | X | X  | X  | X  | X  | X  |
| Intervention provided (type of garment, application of compression bandages)                                          |           | X                                    | X                                     | X          | X | X  | X  | X  | X  | X  |
| <i>Presence of fungal infections/tinea/maceration or cracking of skin between toes</i>                                |           |                                      | X                                     |            | X | X  | X  | X  | X  | X  |
| Adverse events                                                                                                        |           |                                      | X                                     |            | X | X  | X  | X  | X  | X  |
| Intervention compliance                                                                                               |           |                                      | X                                     |            | X | X  | X  | X  | X  | X  |
| <i>Occurrence of wounds/ulcers (acute/chronic)</i>                                                                    |           |                                      |                                       |            | X | X  | X  | X  | X  | X  |

Primary and secondary outcome measures have been underlined. Identified potential risk factors have been italicised.<sup>3 12</sup>

## Research Proposal

E.Webb

### Assignment of interventions and blinding

Participants will be assigned to the intervention or control group in a 1:1 allocation ratio using block randomisation, with a block size of 10. Sealed sequentially numbered opaque envelopes will be used to ensure concealed allocation. A computer-generated allocation sequence will be created and supplied by a consultant statistician and saved in a folder only accessible by administration staff.

Administration staff will prepare the sealed sequentially numbered opaque envelopes, ensuring therapists involved in participant allocation have no premature access to the letters.

Therapists will not be blinded due to practicalities of providing the intervention within a small team of 4 specialised clinicians. Further, the visible nature of the treatment and lack of feasible sham interventions prevent effective blinding of both assessors and participants. Additionally, for ethical reasons, participants will be fully informed of both the potential interventions, prior to consenting to participate.

### Data management and quality assurance

Prior to any involvement in the trial, therapists will receive training regarding trial implementation and completion of outcome measures. Refresher training will be provided to therapists annually and the trial protocol will be kept readily available.

For the duration of the study, data will be stored in identifiable form in both a locked office and on a secure access hard drive, accessible only by designated research staff. Data will be entered by a research officer or members of the research team. For quality assurance, data completeness will be reviewed annually, and all entered data will be cross-checked against written records at least once after initial entry. Following trial conclusion and prior to data analysis, all data will be de-identified. Data will be stored for a minimum of 7 years as per CPHB policy, however data may be retained for longer for identified new, ethically approved ancillary studies. A contract with the secondary sponsor ensures they will have no involvement in the study design, in the collection, analysis, and interpretation of data, in the writing of the manuscript, or in the decision to submit the manuscript for publication.

### Participant Retention

Once a participant is enrolled in the study, every effort will be made to ensure they are followed up as per the protocol. Where participants cannot attend a scheduled appointment, a phone call assessment may be completed to gain the primary outcome measure. Phone call assessment will not allow for completion of limb volume or QOL measures but will capture date of cellulitis recurrence and cellulitis-related hospitalisation.



1  
2  
3 Participants can withdraw from the study at any point. For participants that withdraw, the medical  
4 record and/or general practitioner report may be checked according to the schedule for cellulitis  
5 recurrence and cellulitis-related hospitalisation.  
6  
7

### 8 9 **Termination criteria**

10 Participants will be withdrawn from the study in the case of death, withdrawal of consent or if they  
11 develop a wound or lymphorrhea requiring compression for effective management<sup>33</sup>.  
12  
13

### 14 15 **Proposed methods for data analysis**

16 For the main outcome measure of ‘time to first episode of recurrent cellulitis’, survival analysis will  
17 be undertaken. Kaplan-Meier plots will be used to visualise patterns of time to first cellulitis  
18 recurrence between the groups, with a log rank test being used to determine if there is a statistically  
19 significant difference between the groups. Cox proportional hazards regression may also be used to  
20 adjust for important risk factors. Right censoring will be used for participants who are lost to follow  
21 up. Intention to treat analysis will be used, with all enrolled participants being assessed according to  
22 their randomisation, regardless of protocol adherence.  
23  
24  
25  
26  
27  
28  
29

30 For the secondary outcomes of percent change in limb volume and QOL, measures will be taken at  
31 multiple time points. Therefore, groups will be compared using a linear mixed model or using a  
32 repeated measures analysis. A generalized linear model will be used to assess rate of cellulitis-related  
33 hospital admissions.  
34  
35  
36  
37

### 38 **MINIMISING BIAS**

#### 39 **Selection and attrition bias**

40 Use of randomisation will minimise selection bias and confounding. Stratification will ensure use of  
41 prophylactic antibiotics is not confounded with treatment assignment. Presence and distribution of  
42 other known potential confounding factors will be measured and reported. Intention to treat analysis  
43 will be used to prevent attrition bias that may occur through loss to follow up of participants.  
44  
45  
46  
47  
48

#### 49 **Internal validity**

50 Use of an RCT and validated measurement tools support the internal validity of this research. The  
51 lack of blinding of therapists and participants has the potential to induce surveillance and recall bias  
52 and lead to differential measurement error in the reporting of cellulitis recurrence. To minimise this,  
53 accuracy of self-report of recurrence may be cross-checked with the participant’s general practitioner  
54 or medical record (from CPHB and Canberra Hospital). Diagnosis of cellulitis by doctors external to  
55 the study and use of perometry to measure limb volume will reduce the risk of measurement bias and  
56  
57  
58  
59  
60

## Research Proposal

E.Webb

1  
2  
3 thus differential measurement error. Calibration of the perometer will be performed to prevent non-  
4 differential measurement error that could result from machine error.  
5  
6

7  
8 Control and intervention group participants have the same appointment schedule throughout the  
9 duration of the trial, however participants in the intervention group may attend more appointments  
10 than the control group. This systematic difference in clinician contact could influence participant's  
11 perceived benefit, allowing potential bias in self-reported measures (LYMQOL, EQ-5D).  
12  
13

14  
15  
16 Participants enrolled in the trial have a history of 2 or more episodes of cellulitis diagnosed by  
17 medical practitioners independent to the trial. As misdiagnosis of lower limb cellulitis is not  
18 uncommon<sup>34</sup>, the trial may include incorrectly diagnosed participants leading to non-differential  
19 misclassification.  
20  
21

### 22 23 24 **ANALYSIS OF COSTS**

25 A within-trial cost-analysis assessment will be conducted. Data obtained from the trial and participant  
26 medical records will be used to assess the cost of oedema management and the cost of an episode of  
27 cellulitis from both an individual and a health systems perspective. Upon completion of the RCT, the  
28 cost-effectiveness and cost-utility of chronic oedema management to prevent recurrent cellulitis may  
29 be assessed.  
30  
31  
32

### 33 34 35 **ETHICS AND DISSEMINATION**

36 Ethics approval has been granted for these studies by three institutional committees:

- 37 1. Calvary Public Hospital Bruce Human Research Ethics Committee ETH.4.17.092
  - 38 2. Australian Capital Territory Health Human Research Ethics Committee (53-2016)
  - 39 3. University of Canberra Human Research Ethics Committee (cross-institutional approval)
- 40  
41  
42  
43

44 Regardless of the outcome of the trial, the findings are planned to be submitted for publication in  
45 relevant peer-reviewed journals and for presentations at national and international conferences. Key  
46 findings will be disseminated to identified stakeholders, including primary contact clinicians for  
47 patients experiencing cellulitis (doctors and health professionals in acute and community settings),  
48 clinicians who manage chronic oedema and professionals who may be involved in developing  
49 relevant policy and practice. Upon request, participants will be provided with a copy of the trial  
50 results.  
51  
52  
53  
54

### 55 56 57 **DISCUSSION**

58 Although current expert consensus recommends compression therapy to prevent the recurrence of  
59 cellulitis in patients with lower limb chronic oedema, the evidence supporting this recommendation is  
60

## Research Proposal

E.Webb

1  
2  
3 lacking. This study aims to review the efficacy of compression therapy to allow for better informed  
4 practice and policy. Given the high incidence of cellulitis within Australia and around the world,  
5 reducing cellulitis recurrence will significantly decrease cost to the healthcare system and reduce  
6 financial and personal burden of sufferers. Further, should compression therapy reduce the recurrence  
7 of cellulitis this may limit the dependence and widespread prescription of prophylactic antibiotics.  
8 This trial will be performed on adults receiving healthcare services in the Australian Capital Territory,  
9 however the results will be relevant to cellulitis management throughout Australia and internationally.  
10  
11  
12  
13  
14  
15

**Author affiliations**

- 16 1. Physiotherapy Department, Calvary Public Hospital Bruce, Canberra, Australian Capital  
17 Territory, Australia
- 18 2. Discipline of Physiotherapy, Faculty of Health, University of Canberra, Canberra, Australian  
19 Capital Territory, Australia
- 20 3. Statistical Consulting Unit, Australian National University, Canberra, Australian Capital  
21 Territory, Australia
- 22 4. University of Canberra Research Institute for Sport and Exercise (UC-RISE), Canberra,  
23 Australia.
- 24 5. Medical Stream, Calvary Public Hospital Bruce, Canberra, Australian Capital Territory,  
25 Australia
- 26 6. Infectious Diseases Unit, Canberra Hospital, Canberra, Australian Capital Territory, Australia
- 27 7. Medical School, Australian National University, Canberra, Australian Capital Territory,  
28 Australia
- 29 8. Australian Institute of Health Innovation, Macquarie University, Sydney, New South Wales,  
30 Australia.  
31  
32  
33  
34  
35  
36  
37  
38  
39  
40  
41  
42

43 **Acknowledgements** The Calvary Public Hospital Bruce Lymphoedema Team, specifically Gemma  
44 Arnold, Marie-Michelle Coulombe, Ingrid Thé, Abby Benton, Emma May, Sarah Squires,  
45 Caitlin Norris, Nievelle Chand, Sarah Toohey, Ashlee Cashion and Bhavleen Singh.  
46

47 **Author contributions** EW: trial design and implementation, contribution of original material, editing  
48 and approval of final manuscript. BB: trial implementation support and contribution of original  
49 material. TN: trial design input and statistical support. VM: economic analysis support. BB, TN,  
50 JG, FB and VM provided supervision, contributed to refinement of the protocol, and approved  
51 the final manuscript.  
52  
53  
54

55 **Funding** Calvary Public Hospital Bruce is the primary sponsor, funding clinician time to initiate and  
56 manage the trial. Haddenham Healthcare is a secondary sponsor, providing two sets of free  
57 compression garments for each trial participant. Haddenham Healthcare had no role in designing this  
58  
59  
60

**Research Proposal**

E.Webb

1  
2  
3 study, and will not be involved in the trial implementation, analyses, data interpretation, or  
4 publication or dissemination of results. Haddenham Healthcare will not have access to trial data.

5  
6 **Competing interests** None

7  
8 **Ethics approval** The Human Research Ethics Committees of Calvary Public Hospital Bruce,  
9 Australian Capital Territory Health and University of Canberra all approved this trial.

10  
11 **Provenance and peer review** Not commissioned; externally peer reviewed

12  
13 **Trial status** The ICTOC trial is currently in progress. Participant recruitment started in May 2017 and  
14 is expected to continue until December 2019.  
15  
16  
17  
18  
19  
20  
21  
22  
23  
24  
25  
26  
27  
28  
29  
30  
31  
32  
33  
34  
35  
36  
37  
38  
39  
40  
41  
42  
43  
44  
45  
46  
47  
48  
49  
50  
51  
52  
53  
54  
55  
56  
57  
58  
59  
60

For peer review only

## REFERENCES

1. Swartz MN. Clinical practice. Cellulitis. *N Engl J Med* 2004;350:904-12. doi: 10.1056/NEJMcp031807 [published Online First: 2004/02/27]
2. Eriksson B, Jorup-Rönström C, Karkkonen K, et al. Erysipelas: clinical and bacteriologic spectrum and serological aspects. *Clin Infect Dis* 1996;23:1091-98.
3. Pavlotsky F, Amrani S, Trau H. Recurrent erysipelas: risk factors. *J Dtsch Dermatol Ges* 2004;2:89-95.
4. Inghammar M, Rasmussen M, Linder A. Recurrent erysipelas-risk factors and clinical presentation. *BMC Infect Dis* 2014;14:270-70. doi: 10.1186/1471-2334-14-270
5. The Australian Commission on Safety and Quality in Healthcare. Australian Atlas of Healthcare Variation 2017, 2017:81-90.
6. National Health Performance Authority. Healthy Communities: Potentially preventable hospitalisations in 2013–14. 2015
7. National Health Performance Authority. Hospital Performance: Costs of acute admitted patients in public hospitals in 2011–12, 2015.
8. Cox NH. Oedema as a risk factor for multiple episodes of cellulitis/erysipelas of the lower leg: a series with community follow-up. *Br J Dermatol* 2006;155:947-50. doi: doi:10.1111/j.1365-2133.2006.07419.x
9. Jorup-Ronstrom C, Britton S. Recurrent erysipelas: predisposing factors and costs of prophylaxis. *Infection* 1987;15:105-6. [published Online First: 1987/03/01]
10. Mortimer PS, Levick JR. Chronic peripheral oedema: the critical role of the lymphatic system. *Clini Med (Lond)* 2004;4:448-53.
11. Moffatt C, Keeley V, Quere I. The Concept of Chronic Edema-A Neglected Public Health Issue and an International Response: The LIMPRINT Study. *Lymphat Res Biol* 2019;17:121-26. doi: 10.1089/lrb.2018.0085 [published Online First: 2019/04/18]
12. Dupuy A, Benchikhi H, Roujeau JC, et al. Risk factors for erysipelas of the leg (cellulitis): case-control study. *BMJ* 1999;318(7198):1591-4. [published Online First: 1999/06/11]
13. Karppelein M, Siljander T, Vuopio-Varkila J, et al. Factors predisposing to acute and recurrent bacterial non-necrotizing cellulitis in hospitalized patients: a prospective case-control study. *Clin Microbiol Infect* 2010;16:729-34. doi: 10.1111/j.1469-0691.2009.02906.x
14. Chlebicki MP, Oh CC. Recurrent cellulitis: risk factors, etiology, pathogenesis and treatment. *Curr Infect Dis Rep* 2014;16:422. doi: 10.1007/s11908-014-0422-0 [published Online First: 2014/07/02]
15. Todd M. Chronic oedema: impact and management. *Br J Nurs* 2013;22:623-7. doi: 10.12968/bjon.2013.22.11.623 [published Online First: 2013/08/01]
16. Cox NH, Colver GB, Paterson WD. Management and morbidity of cellulitis of the leg. *J R Soc Med* 1998;91:634-7. [published Online First: 2000/03/24]
17. Arsenault K, Rielly L, Wise H. Effects of Complete Decongestive Therapy on the Incidence Rate of Hospitalization for the Management of Recurrent Cellulitis in Adults with Lymphedema. *Rehabil Oncol* 2011;29:14-20.
18. Ko DS, Lerner R, Klose G, et al. Effective treatment of lymphedema of the extremities. *Arch Surg* 1998;133:452-8. [published Online First: 1998/05/23]
19. Thomas KS, Crook AM, Nunn AJ, et al. Penicillin to prevent recurrent leg cellulitis. *N Engl J Med* 2013;368:1695-703. doi: 10.1056/NEJMoa1206300
20. Dalal A, Eskin-Schwartz M, Mimouni D, et al. Interventions for the prevention of recurrent erysipelas and cellulitis. *Cochrane Database of Systematic Reviews* 2017; 6. Doi: 10.1002/14651858.CD009758
21. Thomas K, Crook A, Foster K, et al. Prophylactic antibiotics for the prevention of cellulitis (erysipelas) of the leg: results of the UK Dermatology Clinical Trials Network's PATCH II trial. *Br J Dermatol* 2012;166:169-78. doi: 10.1111/j.1365-2133.2011.10586.x
22. Australasian Lymphology Association. About the National Lymphoedema Practitioners Register [Website]. 2018 <http://www.lymphoedema.org.au/the-register-updated> (accessed September 2018)

## Research Proposal

E.Webb

23. Carratala J, Roson B, Fernandez-Sabe N, et al. Factors associated with complications and mortality in adult patients hospitalized for infectious cellulitis. *Eur J Clin Microbiol Infect Dis* 2003;22:151-7. doi: 10.1007/s10096-003-0902-x [published Online First: 2003/03/22]
24. Nassaji M, Ghorbani R, Ghashghaee S. Risk factors of acute cellulitis in adult patients: A case-control study. *EJM* 2016;21:26-30. doi: 10.5505/ejm.2016.95605
25. Man IO, Markland KL, Morrissey MC. The validity and reliability of the Perometer in evaluating human knee volume. *Clin Physiol Funct Imaging* 2004;24:352-8. doi: 10.1111/j.1475-097X.2004.00577.x [published Online First: 2004/11/04]
26. Czerniec S, Ward L, Lee M-J, et al. Segmental measurement of breast cancer-related arm lymphoedema using perometry and bioimpedance spectroscopy. *Support Care Cancer* 2010;19:703-10. doi: 10.1007/s00520-010-0896-8
27. Czerniec SA, Ward LC, Refshauge KM, et al. Assessment of breast cancer-related arm lymphedema-comparison of physical measurement methods and self-report. *Cancer Invest* 2010;28:54-62. doi: 10.3109/07357900902918494 [published Online First: 2009/11/18]
28. Bulley C, Coutts F, Tan C-W. Perometry limb volume measurement: Protocol development and reliability *Eur J Physiother* 2013;15 doi: 10.3109/21679169.2013.831482
29. Devoogdt N, Lemkens H, Geraerts I, et al. A new device to measure upper limb circumferences: validity and reliability. *Int Angiol* 2010;29:401-7. [published Online First: 2010/10/07]
30. Keeley V, Crooks S, Locke J, et al. A quality of life measure for limb lymphoedema (LYMQOL). *J lymphoedema* 2010;5:26-37.
31. Yang Y, Brazier J, Longworth L. EQ-5D in skin conditions: an assessment of validity and responsiveness. *Eur J Health Econ* 2015;16:927-39. doi: 10.1007/s10198-014-0638-9 [published Online First: 2014/11/02]
32. R Core Team. R: A language and environment for statistical computing: R Foundation for Statistical Computing, Vienna, Austria. 2018 <https://www.R-project.org> (accessed December 2018)
33. O'Meara S, Cullum N, Nelson EA, et al. Compression for venous leg ulcers. *Cochrane Database of Systematic Reviews* 2012(11) doi: 10.1002/14651858.CD000265.pub3
34. Weng QY, Raff AB, Cohen JM, et al. Costs and Consequences Associated With Misdiagnosed Lower Extremity Cellulitis. *JAMA Dermatol* 2017;153:141-46. doi: 10.1001/jamadermatol.2016.3816 [published Online First: 2016/11/03]

1  
2  
3  
4  
5  
6  
7  
8  
9  
10  
11  
12  
13  
14  
15  
16  
17  
18  
19  
20  
21  
22  
23  
24  
25  
26  
27  
28  
29  
30  
31  
32  
33  
34  
35  
36  
37  
38  
39  
40  
41  
42  
43  
44  
45  
46  
47  
48  
49  
50  
51  
52  
53  
54  
55  
56  
57  
58  
59  
60

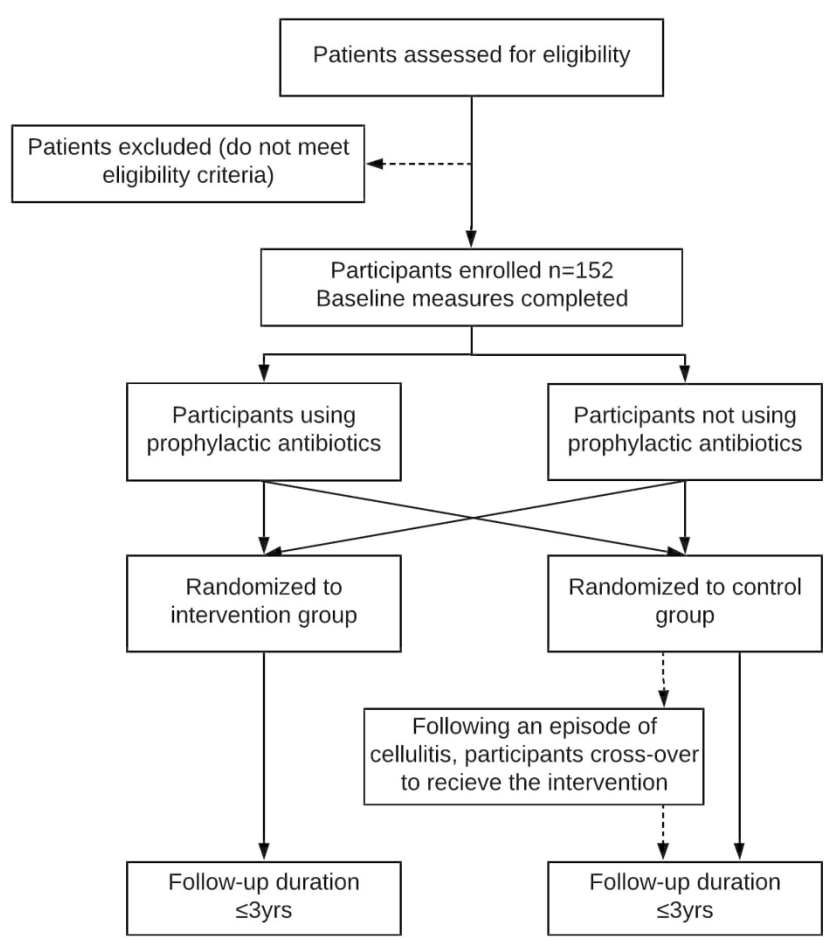

Figure 1: Anticipated participant flow through trial.

165x164mm (300 x 300 DPI)

# Reporting checklist for protocol of a clinical trial.

Based on the SPIRIT guidelines.

## Instructions to authors

Complete this checklist by entering the page numbers from your manuscript where readers will find each of the items listed below.

Your article may not currently address all the items on the checklist. Please modify your text to include the missing information. If you are certain that an item does not apply, please write "n/a" and provide a short explanation.

Upload your completed checklist as an extra file when you submit to a journal.

In your methods section, say that you used the SPIRIT reporting guidelines, and cite them as:

Chan A-W, Tetzlaff JM, Altman DG, Laupacis A, Gøtzsche PC, Krleža-Jerić K, Hróbjartsson A, Mann H, Dickersin K, Berlin J, Doré C, Parulekar W, Summerskill W, Groves T, Schulz K, Sox H, Rockhold FW, Rennie D, Moher D. SPIRIT 2013 Statement: Defining standard protocol items for clinical trials. *Ann Intern Med.* 2013;158(3):200-207

|                    |                     |                                                                                                              | Page   |
|--------------------|---------------------|--------------------------------------------------------------------------------------------------------------|--------|
|                    |                     | Reporting Item                                                                                               | Number |
| Title              | <a href="#">#1</a>  | Descriptive title identifying the study design, population, interventions, and, if applicable, trial acronym | 1      |
| Trial registration | <a href="#">#2a</a> | Trial identifier and registry name. If not yet registered, name of intended registry                         | 2      |



|    |                     |                     |                                                          |       |
|----|---------------------|---------------------|----------------------------------------------------------|-------|
| 1  | Trial registration: | <a href="#">#2b</a> | All items from the World Health Organization Trial       | NA    |
| 2  |                     |                     |                                                          |       |
| 3  | data set            |                     | Registration Data Set                                    |       |
| 4  |                     |                     |                                                          |       |
| 5  |                     |                     |                                                          |       |
| 6  | Protocol version    | <a href="#">#3</a>  | Date and version identifier                              | 2     |
| 7  |                     |                     |                                                          |       |
| 8  |                     |                     |                                                          |       |
| 9  | Funding             | <a href="#">#4</a>  | Sources and types of financial, material, and other      | 16    |
| 10 |                     |                     | support                                                  |       |
| 11 |                     |                     |                                                          |       |
| 12 |                     |                     |                                                          |       |
| 13 |                     |                     |                                                          |       |
| 14 |                     |                     |                                                          |       |
| 15 | Roles and           | <a href="#">#5a</a> | Names, affiliations, and roles of protocol contributors  | 16    |
| 16 |                     |                     |                                                          |       |
| 17 | responsibilities:   |                     |                                                          |       |
| 18 |                     |                     |                                                          |       |
| 19 | contributorship     |                     |                                                          |       |
| 20 |                     |                     |                                                          |       |
| 21 |                     |                     |                                                          |       |
| 22 |                     |                     |                                                          |       |
| 23 | Roles and           | <a href="#">#5b</a> | Name and contact information for the trial sponsor       | 1,16  |
| 24 |                     |                     |                                                          |       |
| 25 | responsibilities:   |                     |                                                          |       |
| 26 |                     |                     |                                                          |       |
| 27 | sponsor contact     |                     |                                                          |       |
| 28 |                     |                     |                                                          |       |
| 29 | information         |                     |                                                          |       |
| 30 |                     |                     |                                                          |       |
| 31 |                     |                     |                                                          |       |
| 32 | Roles and           | <a href="#">#5c</a> | Role of study sponsor and funders, if any, in study      | 13,16 |
| 33 |                     |                     |                                                          |       |
| 34 | responsibilities:   |                     | design; collection, management, analysis, and            |       |
| 35 |                     |                     |                                                          |       |
| 36 | sponsor and funder  |                     | interpretation of data; writing of the report; and the   |       |
| 37 |                     |                     |                                                          |       |
| 38 |                     |                     | decision to submit the report for publication, including |       |
| 39 |                     |                     |                                                          |       |
| 40 |                     |                     | whether they will have ultimate authority over any of    |       |
| 41 |                     |                     |                                                          |       |
| 42 |                     |                     | these activities                                         |       |
| 43 |                     |                     |                                                          |       |
| 44 |                     |                     |                                                          |       |
| 45 |                     |                     |                                                          |       |
| 46 |                     |                     |                                                          |       |
| 47 | Roles and           | <a href="#">#5d</a> | Composition, roles, and responsibilities of the          | 10    |
| 48 |                     |                     |                                                          |       |
| 49 | responsibilities:   |                     | coordinating centre, steering committee, endpoint        |       |
| 50 |                     |                     |                                                          |       |
| 51 | committees          |                     | adjudication committee, data management team, and        |       |
| 52 |                     |                     |                                                          |       |
| 53 |                     |                     | other individuals or groups overseeing the trial, if     |       |
| 54 |                     |                     |                                                          |       |
| 55 |                     |                     |                                                          |       |
| 56 |                     |                     |                                                          |       |
| 57 |                     |                     |                                                          |       |
| 58 |                     |                     |                                                          |       |
| 59 |                     |                     |                                                          |       |
| 60 |                     |                     |                                                          |       |

|    |                      |                                                                             |     |
|----|----------------------|-----------------------------------------------------------------------------|-----|
| 1  |                      | applicable (see Item 21a for data monitoring                                |     |
| 2  |                      | committee)                                                                  |     |
| 3  |                      |                                                                             |     |
| 4  |                      |                                                                             |     |
| 5  |                      |                                                                             |     |
| 6  | Background and       | <a href="#">#6a</a> Description of research question and justification for  | 4   |
| 7  | rationale            | undertaking the trial, including summary of relevant                        |     |
| 8  |                      | studies (published and unpublished) examining                               |     |
| 9  |                      | benefits and harms for each intervention                                    |     |
| 10 |                      |                                                                             |     |
| 11 |                      |                                                                             |     |
| 12 |                      |                                                                             |     |
| 13 |                      |                                                                             |     |
| 14 |                      |                                                                             |     |
| 15 | Background and       | <a href="#">#6b</a> Explanation for choice of comparators                   | 4,5 |
| 16 | rationale: choice of |                                                                             |     |
| 17 | comparators          |                                                                             |     |
| 18 |                      |                                                                             |     |
| 19 |                      |                                                                             |     |
| 20 |                      |                                                                             |     |
| 21 |                      |                                                                             |     |
| 22 |                      |                                                                             |     |
| 23 | Objectives           | <a href="#">#7</a> Specific objectives or hypotheses                        | 5   |
| 24 |                      |                                                                             |     |
| 25 |                      |                                                                             |     |
| 26 | Trial design         | <a href="#">#8</a> Description of trial design including type of trial (eg, | 5,6 |
| 27 |                      | parallel group, crossover, factorial, single group),                        |     |
| 28 |                      | allocation ratio, and framework (eg, superiority,                           |     |
| 29 |                      | equivalence, non-inferiority, exploratory)                                  |     |
| 30 |                      |                                                                             |     |
| 31 |                      |                                                                             |     |
| 32 |                      |                                                                             |     |
| 33 |                      |                                                                             |     |
| 34 |                      |                                                                             |     |
| 35 |                      |                                                                             |     |
| 36 | Study setting        | <a href="#">#9</a> Description of study settings (eg, community clinic,     | 7   |
| 37 |                      | academic hospital) and list of countries where data                         |     |
| 38 |                      | will be collected. Reference to where list of study sites                   |     |
| 39 |                      | can be obtained                                                             |     |
| 40 |                      |                                                                             |     |
| 41 |                      |                                                                             |     |
| 42 |                      |                                                                             |     |
| 43 |                      |                                                                             |     |
| 44 |                      |                                                                             |     |
| 45 |                      |                                                                             |     |
| 46 | Eligibility criteria | <a href="#">#10</a> Inclusion and exclusion criteria for participants. If   | 7   |
| 47 |                      | applicable, eligibility criteria for study centres and                      |     |
| 48 |                      | individuals who will perform the interventions (eg,                         |     |
| 49 |                      | surgeons, psychotherapists)                                                 |     |
| 50 |                      |                                                                             |     |
| 51 |                      |                                                                             |     |
| 52 |                      |                                                                             |     |
| 53 |                      |                                                                             |     |
| 54 |                      |                                                                             |     |
| 55 |                      |                                                                             |     |
| 56 |                      |                                                                             |     |
| 57 |                      |                                                                             |     |
| 58 |                      |                                                                             |     |
| 59 |                      |                                                                             |     |
| 60 |                      |                                                                             |     |

|    |                      |                      |                                                         |          |
|----|----------------------|----------------------|---------------------------------------------------------|----------|
| 1  | Interventions:       | <a href="#">#11a</a> | Interventions for each group with sufficient detail to  | 7,8      |
| 2  |                      |                      |                                                         |          |
| 3  | description          |                      | allow replication, including how and when they will be  |          |
| 4  |                      |                      | administered                                            |          |
| 5  |                      |                      |                                                         |          |
| 6  |                      |                      |                                                         |          |
| 7  |                      |                      |                                                         |          |
| 8  | Interventions:       | <a href="#">#11b</a> | Criteria for discontinuing or modifying allocated       | 6,8      |
| 9  |                      |                      |                                                         |          |
| 10 | modifications        |                      | interventions for a given trial participant (eg, drug   |          |
| 11 |                      |                      | dose change in response to harms, participant           |          |
| 12 |                      |                      | request, or improving / worsening disease)              |          |
| 13 |                      |                      |                                                         |          |
| 14 |                      |                      |                                                         |          |
| 15 |                      |                      |                                                         |          |
| 16 |                      |                      |                                                         |          |
| 17 |                      |                      |                                                         |          |
| 18 | Interventions:       | <a href="#">#11c</a> | Strategies to improve adherence to intervention         | 8, 11,12 |
| 19 |                      |                      |                                                         |          |
| 20 | adherence            |                      | protocols, and any procedures for monitoring            |          |
| 21 |                      |                      | adherence (eg, drug tablet return; laboratory tests)    |          |
| 22 |                      |                      |                                                         |          |
| 23 |                      |                      |                                                         |          |
| 24 |                      |                      |                                                         |          |
| 25 |                      |                      |                                                         |          |
| 26 | Interventions:       | <a href="#">#11d</a> | Relevant concomitant care and interventions that are    | 8        |
| 27 |                      |                      |                                                         |          |
| 28 | concomitant care     |                      | permitted or prohibited during the trial                |          |
| 29 |                      |                      |                                                         |          |
| 30 |                      |                      |                                                         |          |
| 31 | Outcomes             | <a href="#">#12</a>  | Primary, secondary, and other outcomes, including       | 9,12     |
| 32 |                      |                      |                                                         |          |
| 33 |                      |                      | the specific measurement variable (eg, systolic blood   |          |
| 34 |                      |                      | pressure), analysis metric (eg, change from baseline,   |          |
| 35 |                      |                      | final value, time to event), method of aggregation (eg, |          |
| 36 |                      |                      | median, proportion), and time point for each outcome.   |          |
| 37 |                      |                      |                                                         |          |
| 38 |                      |                      |                                                         |          |
| 39 |                      |                      |                                                         |          |
| 40 |                      |                      |                                                         |          |
| 41 |                      |                      |                                                         |          |
| 42 |                      |                      |                                                         |          |
| 43 |                      |                      | Explanation of the clinical relevance of chosen         |          |
| 44 |                      |                      |                                                         |          |
| 45 |                      |                      | efficacy and harm outcomes is strongly recommended      |          |
| 46 |                      |                      |                                                         |          |
| 47 |                      |                      |                                                         |          |
| 48 | Participant timeline | <a href="#">#13</a>  | Time schedule of enrolment, interventions (including    | 6,8,10   |
| 49 |                      |                      |                                                         |          |
| 50 |                      |                      | any run-ins and washouts), assessments, and visits      |          |
| 51 |                      |                      |                                                         |          |
| 52 |                      |                      |                                                         |          |
| 53 |                      |                      | for participants. A schematic diagram is highly         |          |
| 54 |                      |                      |                                                         |          |
| 55 |                      |                      | recommended (see Figure)                                |          |
| 56 |                      |                      |                                                         |          |
| 57 |                      |                      |                                                         |          |
| 58 |                      |                      |                                                         |          |
| 59 |                      |                      |                                                         |          |
| 60 |                      |                      |                                                         |          |

|    |                    |                      |                                                           |         |
|----|--------------------|----------------------|-----------------------------------------------------------|---------|
| 1  | Sample size        | <a href="#">#14</a>  | Estimated number of participants needed to achieve        | 10      |
| 2  |                    |                      | study objectives and how it was determined, including     |         |
| 3  |                    |                      | clinical and statistical assumptions supporting any       |         |
| 4  |                    |                      | sample size calculations                                  |         |
| 5  |                    |                      |                                                           |         |
| 6  |                    |                      |                                                           |         |
| 7  |                    |                      |                                                           |         |
| 8  |                    |                      |                                                           |         |
| 9  |                    |                      |                                                           |         |
| 10 |                    |                      |                                                           |         |
| 11 | Recruitment        | <a href="#">#15</a>  | Strategies for achieving adequate participant             | 10,11   |
| 12 |                    |                      | enrolment to reach target sample size                     |         |
| 13 |                    |                      |                                                           |         |
| 14 |                    |                      |                                                           |         |
| 15 |                    |                      |                                                           |         |
| 16 | Allocation:        | <a href="#">#16a</a> | Method of generating the allocation sequence (eg,         | 13      |
| 17 | sequence           |                      | computer-generated random numbers), and list of any       |         |
| 18 |                    |                      | factors for stratification. To reduce predictability of a |         |
| 19 | generation         |                      | random sequence, details of any planned restriction       |         |
| 20 |                    |                      | (eg, blocking) should be provided in a separate           |         |
| 21 |                    |                      | document that is unavailable to those who enrol           |         |
| 22 |                    |                      | participants or assign interventions                      |         |
| 23 |                    |                      |                                                           |         |
| 24 |                    |                      |                                                           |         |
| 25 |                    |                      |                                                           |         |
| 26 |                    |                      |                                                           |         |
| 27 |                    |                      |                                                           |         |
| 28 |                    |                      |                                                           |         |
| 29 |                    |                      |                                                           |         |
| 30 |                    |                      |                                                           |         |
| 31 |                    |                      |                                                           |         |
| 32 |                    |                      |                                                           |         |
| 33 | Allocation         | <a href="#">#16b</a> | Mechanism of implementing the allocation sequence         | 13      |
| 34 | concealment        |                      | (eg, central telephone; sequentially numbered,            |         |
| 35 |                    |                      | opaque, sealed envelopes), describing any steps to        |         |
| 36 | mechanism          |                      | conceal the sequence until interventions are assigned     |         |
| 37 |                    |                      |                                                           |         |
| 38 |                    |                      |                                                           |         |
| 39 |                    |                      |                                                           |         |
| 40 |                    |                      |                                                           |         |
| 41 |                    |                      |                                                           |         |
| 42 |                    |                      |                                                           |         |
| 43 | Allocation:        | <a href="#">#16c</a> | Who will generate the allocation sequence, who will       | 13, 7-8 |
| 44 | implementation     |                      | enrol participants, and who will assign participants to   |         |
| 45 |                    |                      | interventions                                             |         |
| 46 |                    |                      |                                                           |         |
| 47 |                    |                      |                                                           |         |
| 48 |                    |                      |                                                           |         |
| 49 |                    |                      |                                                           |         |
| 50 |                    |                      |                                                           |         |
| 51 | Blinding (masking) | <a href="#">#17a</a> | Who will be blinded after assignment to interventions     | 13      |
| 52 |                    |                      | (eg, trial participants, care providers, outcome          |         |
| 53 |                    |                      | assessors, data analysts), and how                        |         |
| 54 |                    |                      |                                                           |         |
| 55 |                    |                      |                                                           |         |
| 56 |                    |                      |                                                           |         |
| 57 |                    |                      |                                                           |         |
| 58 |                    |                      |                                                           |         |
| 59 |                    |                      |                                                           |         |
| 60 |                    |                      |                                                           |         |

|    |                       |                      |                                                              |       |
|----|-----------------------|----------------------|--------------------------------------------------------------|-------|
| 1  | Blinding (masking):   | <a href="#">#17b</a> | If blinded, circumstances under which unblinding is          | NA    |
| 2  |                       |                      |                                                              |       |
| 3  | emergency             |                      | permissible, and procedure for revealing a                   |       |
| 4  |                       |                      |                                                              |       |
| 5  | unblinding            |                      | participant's allocated intervention during the trial        |       |
| 6  |                       |                      |                                                              |       |
| 7  |                       |                      |                                                              |       |
| 8  | Data collection plan  | <a href="#">#18a</a> | Plans for assessment and collection of outcome,              | 13,9  |
| 9  |                       |                      |                                                              |       |
| 10 |                       |                      | baseline, and other trial data, including any related        |       |
| 11 |                       |                      |                                                              |       |
| 12 |                       |                      | processes to promote data quality (eg, duplicate             |       |
| 13 |                       |                      |                                                              |       |
| 14 |                       |                      | measurements, training of assessors) and a                   |       |
| 15 |                       |                      |                                                              |       |
| 16 |                       |                      | description of study instruments (eg, questionnaires,        |       |
| 17 |                       |                      |                                                              |       |
| 18 |                       |                      | laboratory tests) along with their reliability and validity, |       |
| 19 |                       |                      |                                                              |       |
| 20 |                       |                      | if known. Reference to where data collection forms           |       |
| 21 |                       |                      |                                                              |       |
| 22 |                       |                      | can be found, if not in the protocol                         |       |
| 23 |                       |                      |                                                              |       |
| 24 |                       |                      |                                                              |       |
| 25 |                       |                      |                                                              |       |
| 26 |                       |                      |                                                              |       |
| 27 |                       |                      |                                                              |       |
| 28 | Data collection plan: | <a href="#">#18b</a> | Plans to promote participant retention and complete          | 13-14 |
| 29 | retention             |                      | follow-up, including list of any outcome data to be          |       |
| 30 |                       |                      |                                                              |       |
| 31 |                       |                      | collected for participants who discontinue or deviate        |       |
| 32 |                       |                      |                                                              |       |
| 33 |                       |                      | from intervention protocols                                  |       |
| 34 |                       |                      |                                                              |       |
| 35 |                       |                      |                                                              |       |
| 36 |                       |                      |                                                              |       |
| 37 |                       |                      |                                                              |       |
| 38 | Data management       | <a href="#">#19</a>  | Plans for data entry, coding, security, and storage,         | 13    |
| 39 |                       |                      |                                                              |       |
| 40 |                       |                      | including any related processes to promote data              |       |
| 41 |                       |                      |                                                              |       |
| 42 |                       |                      | quality (eg, double data entry; range checks for data        |       |
| 43 |                       |                      |                                                              |       |
| 44 |                       |                      | values). Reference to where details of data                  |       |
| 45 |                       |                      |                                                              |       |
| 46 |                       |                      | management procedures can be found, if not in the            |       |
| 47 |                       |                      |                                                              |       |
| 48 |                       |                      | protocol                                                     |       |
| 49 |                       |                      |                                                              |       |
| 50 |                       |                      |                                                              |       |
| 51 |                       |                      |                                                              |       |
| 52 | Statistics: outcomes  | <a href="#">#20a</a> | Statistical methods for analysing primary and                | 14    |
| 53 |                       |                      |                                                              |       |
| 54 |                       |                      | secondary outcomes. Reference to where other                 |       |
| 55 |                       |                      |                                                              |       |
| 56 |                       |                      |                                                              |       |
| 57 |                       |                      |                                                              |       |
| 58 |                       |                      |                                                              |       |
| 59 |                       |                      |                                                              |       |
| 60 |                       |                      |                                                              |       |

1 details of the statistical analysis plan can be found, if  
 2  
 3 not in the protocol  
 4

5  
 6 Statistics: additional [#20b](#) Methods for any additional analyses (eg, subgroup 14  
 7 analyses and adjusted analyses)  
 8  
 9

10  
 11 Statistics: analysis [#20c](#) Definition of analysis population relating to protocol 14  
 12 population and non-adherence (eg, as randomised analysis), and any  
 13 missing data statistical methods to handle missing data (eg,  
 14 multiple imputation)  
 15  
 16  
 17  
 18  
 19  
 20

21 Data monitoring: [#21a](#) Composition of data monitoring committee (DMC); 10  
 22 formal committee summary of its role and reporting structure; statement  
 23 of whether it is independent from the sponsor and  
 24 competing interests; and reference to where further  
 25 details about its charter can be found, if not in the  
 26 protocol. Alternatively, an explanation of why a DMC  
 27 is not needed  
 28  
 29  
 30  
 31  
 32  
 33  
 34  
 35  
 36  
 37

38 Data monitoring: [#21b](#) Description of any interim analyses and stopping 10  
 39 interim analysis guidelines, including who will have access to these  
 40 interim results and make the final decision to  
 41 terminate the trial  
 42  
 43  
 44  
 45  
 46

47 Harms [#22](#) Plans for collecting, assessing, reporting, and 8  
 48 managing solicited and spontaneously reported  
 49 adverse events and other unintended effects of trial  
 50 interventions or trial conduct  
 51  
 52  
 53  
 54  
 55  
 56  
 57  
 58  
 59  
 60

|    |                    |                      |                                                         |          |
|----|--------------------|----------------------|---------------------------------------------------------|----------|
| 1  | Auditing           | <a href="#">#23</a>  | Frequency and procedures for auditing trial conduct, if | NA       |
| 2  |                    |                      | any, and whether the process will be independent        |          |
| 3  |                    |                      | from investigators and the sponsor                      |          |
| 4  |                    |                      |                                                         |          |
| 5  |                    |                      |                                                         |          |
| 6  |                    |                      |                                                         |          |
| 7  |                    |                      |                                                         |          |
| 8  |                    |                      |                                                         |          |
| 9  | Research ethics    | <a href="#">#24</a>  | Plans for seeking research ethics committee /           | 15       |
| 10 |                    |                      | institutional review board (REC / IRB) approval         |          |
| 11 | approval           |                      |                                                         |          |
| 12 |                    |                      |                                                         |          |
| 13 |                    |                      |                                                         |          |
| 14 | Protocol           | <a href="#">#25</a>  | Plans for communicating important protocol              | NA       |
| 15 |                    |                      | modifications (eg, changes to eligibility criteria,     |          |
| 16 | amendments         |                      | outcomes, analyses) to relevant parties (eg,            |          |
| 17 |                    |                      | investigators, REC / IRBs, trial participants, trial    |          |
| 18 |                    |                      | registries, journals, regulators)                       |          |
| 19 |                    |                      |                                                         |          |
| 20 |                    |                      |                                                         |          |
| 21 |                    |                      |                                                         |          |
| 22 |                    |                      |                                                         |          |
| 23 |                    |                      |                                                         |          |
| 24 |                    |                      |                                                         |          |
| 25 |                    |                      |                                                         |          |
| 26 | Consent or assent  | <a href="#">#26a</a> | Who will obtain informed consent or assent from         | 11       |
| 27 |                    |                      | potential trial participants or authorised surrogates,  |          |
| 28 |                    |                      | and how (see Item 32)                                   |          |
| 29 |                    |                      |                                                         |          |
| 30 |                    |                      |                                                         |          |
| 31 |                    |                      |                                                         |          |
| 32 |                    |                      |                                                         |          |
| 33 |                    |                      |                                                         |          |
| 34 | Consent or assent: | <a href="#">#26b</a> | Additional consent provisions for collection and use of | NA       |
| 35 | ancillary studies  |                      | participant data and biological specimens in ancillary  |          |
| 36 |                    |                      | studies, if applicable                                  |          |
| 37 |                    |                      |                                                         |          |
| 38 |                    |                      |                                                         |          |
| 39 |                    |                      |                                                         |          |
| 40 |                    |                      |                                                         |          |
| 41 | Confidentiality    | <a href="#">#27</a>  | How personal information about potential and enrolled   | 13       |
| 42 |                    |                      | participants will be collected, shared, and maintained  |          |
| 43 |                    |                      | in order to protect confidentiality before, during, and |          |
| 44 |                    |                      | after the trial                                         |          |
| 45 |                    |                      |                                                         |          |
| 46 |                    |                      |                                                         |          |
| 47 |                    |                      |                                                         |          |
| 48 |                    |                      |                                                         |          |
| 49 |                    |                      |                                                         |          |
| 50 |                    |                      |                                                         |          |
| 51 | Declaration of     | <a href="#">#28</a>  | Financial and other competing interests for principal   | NA (Page |
| 52 | interests          |                      | investigators for the overall trial and each study site | 17)      |
| 53 |                    |                      |                                                         |          |
| 54 |                    |                      |                                                         |          |
| 55 |                    |                      |                                                         |          |
| 56 |                    |                      |                                                         |          |
| 57 |                    |                      |                                                         |          |
| 58 |                    |                      |                                                         |          |
| 59 |                    |                      |                                                         |          |
| 60 |                    |                      |                                                         |          |

|    |                       |                      |                                                            |             |
|----|-----------------------|----------------------|------------------------------------------------------------|-------------|
| 1  | Data access           | <a href="#">#29</a>  | Statement of who will have access to the final trial       | 13          |
| 2  |                       |                      |                                                            |             |
| 3  |                       |                      | dataset, and disclosure of contractual agreements that     |             |
| 4  |                       |                      | limit such access for investigators                        |             |
| 5  |                       |                      |                                                            |             |
| 6  |                       |                      |                                                            |             |
| 7  |                       |                      |                                                            |             |
| 8  | Ancillary and post    | <a href="#">#30</a>  | Provisions, if any, for ancillary and post-trial care, and | NA          |
| 9  | trial care            |                      | for compensation to those who suffer harm from trial       |             |
| 10 |                       |                      | participation                                              |             |
| 11 |                       |                      |                                                            |             |
| 12 |                       |                      |                                                            |             |
| 13 |                       |                      |                                                            |             |
| 14 |                       |                      |                                                            |             |
| 15 |                       |                      |                                                            |             |
| 16 | Dissemination         | <a href="#">#31a</a> | Plans for investigators and sponsor to communicate         | 15          |
| 17 | policy: trial results |                      | trial results to participants, healthcare professionals,   |             |
| 18 |                       |                      | the public, and other relevant groups (eg, via             |             |
| 19 |                       |                      | publication, reporting in results databases, or other      |             |
| 20 |                       |                      | data sharing arrangements), including any publication      |             |
| 21 |                       |                      | restrictions                                               |             |
| 22 |                       |                      |                                                            |             |
| 23 |                       |                      |                                                            |             |
| 24 |                       |                      |                                                            |             |
| 25 |                       |                      |                                                            |             |
| 26 |                       |                      |                                                            |             |
| 27 |                       |                      |                                                            |             |
| 28 |                       |                      |                                                            |             |
| 29 |                       |                      |                                                            |             |
| 30 |                       |                      |                                                            |             |
| 31 | Dissemination         | <a href="#">#31b</a> | Authorship eligibility guidelines and any intended use     | 16          |
| 32 | policy: authorship    |                      | of professional writers                                    |             |
| 33 |                       |                      |                                                            |             |
| 34 |                       |                      |                                                            |             |
| 35 |                       |                      |                                                            |             |
| 36 | Dissemination         | <a href="#">#31c</a> | Plans, if any, for granting public access to the full      | NA          |
| 37 | policy: reproducible  |                      | protocol, participant-level dataset, and statistical code  | (Publishing |
| 38 | research              |                      |                                                            | protocol)   |
| 39 |                       |                      |                                                            |             |
| 40 |                       |                      |                                                            |             |
| 41 |                       |                      |                                                            |             |
| 42 |                       |                      |                                                            |             |
| 43 |                       |                      |                                                            |             |
| 44 | Informed consent      | <a href="#">#32</a>  | Model consent form and other related documentation         | NA (not     |
| 45 | materials             |                      | given to participants and authorised surrogates            | included in |
| 46 |                       |                      |                                                            | protocol)   |
| 47 |                       |                      |                                                            |             |
| 48 |                       |                      |                                                            |             |
| 49 |                       |                      |                                                            |             |
| 50 |                       |                      |                                                            |             |
| 51 | Biological            | <a href="#">#33</a>  | Plans for collection, laboratory evaluation, and storage   | NA          |
| 52 | specimens             |                      | of biological specimens for genetic or molecular           |             |
| 53 |                       |                      |                                                            |             |
| 54 |                       |                      |                                                            |             |
| 55 |                       |                      |                                                            |             |
| 56 |                       |                      |                                                            |             |
| 57 |                       |                      |                                                            |             |
| 58 |                       |                      |                                                            |             |
| 59 |                       |                      |                                                            |             |
| 60 |                       |                      |                                                            |             |



1 analysis in the current trial and for future use in

2  
3 ancillary studies, if applicable

4  
5  
6 The SPIRIT checklist is distributed under the terms of the Creative Commons Attribution License CC-  
7  
8 BY-ND 3.0. This checklist can be completed online using <https://www.goodreports.org/>, a tool made  
9  
10 by the [EQUATOR Network](#) in collaboration with [Penelope.ai](#)  
11  
12  
13  
14  
15  
16  
17  
18  
19  
20  
21  
22  
23  
24  
25  
26  
27  
28  
29  
30  
31  
32  
33  
34  
35  
36  
37  
38  
39  
40  
41  
42  
43  
44  
45  
46  
47  
48  
49  
50  
51  
52  
53  
54  
55  
56  
57  
58  
59  
60

# BMJ Open

## Impact of Compression Therapy on Cellulitis (ICTOC) in adults with chronic oedema: a randomised controlled trial protocol

|                                 |                                                                                                                                                                                                                                                                                                                                                                                                                                                                                                                           |
|---------------------------------|---------------------------------------------------------------------------------------------------------------------------------------------------------------------------------------------------------------------------------------------------------------------------------------------------------------------------------------------------------------------------------------------------------------------------------------------------------------------------------------------------------------------------|
| Journal:                        | <i>BMJ Open</i>                                                                                                                                                                                                                                                                                                                                                                                                                                                                                                           |
| Manuscript ID                   | bmjopen-2019-029225.R2                                                                                                                                                                                                                                                                                                                                                                                                                                                                                                    |
| Article Type:                   | Protocol                                                                                                                                                                                                                                                                                                                                                                                                                                                                                                                  |
| Date Submitted by the Author:   | 30-Jun-2019                                                                                                                                                                                                                                                                                                                                                                                                                                                                                                               |
| Complete List of Authors:       | Webb, Elizabeth; Calvary Public Hospital, Physiotherapy; University of Canberra, Faculty of Health<br>Neeman, Teresa; Australian National University, Biological Data Science Institute<br>Gaida, Jamie; University of Canberra Research Institute for Sport and Exercise (UC-RISE)<br>Bowden, Francis; Calvary Public Hospital Bruce; Australian National University<br>Mumford, Virginia; Macquarie University, Australian Institute of Health Innovation<br>Bissett, Bernie; University of Canberra, Faculty of Health |
| <b>Primary Subject Heading</b>: | Infectious diseases                                                                                                                                                                                                                                                                                                                                                                                                                                                                                                       |
| Secondary Subject Heading:      | Dermatology, General practice / Family practice                                                                                                                                                                                                                                                                                                                                                                                                                                                                           |
| Keywords:                       | INFECTIOUS DISEASES, Cellulitis, Recurrence, Lymphedema, Edema, Compression Stockings                                                                                                                                                                                                                                                                                                                                                                                                                                     |
|                                 |                                                                                                                                                                                                                                                                                                                                                                                                                                                                                                                           |

SCHOLARONE™  
Manuscripts

**Title:** Impact of Compression Therapy on Cellulitis (ICTOC) in adults with chronic oedema: a randomised controlled trial protocol

**Authors:**

1. Elizabeth Webb, Physiotherapy Department, Calvary Public Hospital Bruce and University of Canberra, Canberra, Australia.
2. Teresa Neeman, Statistical Consulting Unit, Australian National University, Canberra, Australia.
3. Jamie Gaida, University of Canberra Research Institute for Sport and Exercise (UC-RISE), Canberra, Australia.
4. Francis J. Bowden, Calvary Public Hospital Bruce and Australian National University, Canberra, Australia.
5. Virginia Mumford, Australian Institute of Health Innovation, Macquarie University, Sydney, Australia.
6. Bernie Bissett, Faculty of Health, University of Canberra, Canberra, Australia.

**Correspondence:**

|             |                                                                                          |
|-------------|------------------------------------------------------------------------------------------|
| Name        | Elizabeth Webb                                                                           |
| Department  | Physiotherapy Department                                                                 |
| Institution | Calvary Public Hospital Bruce & University of Canberra                                   |
| Country     | Australia                                                                                |
| Address     | Physiotherapy Department, Calvary Public Hospital Bruce, Haydon Drive, Bruce<br>ACT 2617 |
| Tel         | +61 2 6201 6190                                                                          |
| Mob         | +61 412 959 294                                                                          |
| Fax         | +61 2 6201 6196                                                                          |
| Email       | elizabeth.webb@calvary-act.com.au                                                        |

**Key words:** cellulitis, recurrence, edema, lymphedema, compression stockings, physical therapy techniques

**Word Count:** (Abstract) 280  
(Body) 3857 (excluding table 1)

**References:** 36

**Tables:** 1

**Figures:** 1

**Competing interests:** Nil

- **Trial registration number:** ACTRN12617000412336 (Australia New Zealand Clinical Trials Registry)
- **Date Registered:** 22/03/2017

## ABSTRACT

### Introduction:

Cellulitis represents a significant burden to patients' quality of life and cost to the healthcare system, especially due to its recurrent nature. Chronic oedema is a strong risk factor for both an initial episode of cellulitis and cellulitis recurrence. Expert consensus advises compression therapy to prevent cellulitis recurrence in individuals with chronic oedema, however there is little supporting evidence. This research aims to determine if management of chronic oedema using compression therapy effectively delays recurrence of lower limb cellulitis.

**Methods and analysis:** A randomised controlled trial with cross-over will be used to assess the impact of compression therapy on clinical outcomes (time to next episode of cellulitis, rate of cellulitis-related hospital presentations, quality of life and leg volume). Using concealed allocation, 162 participants will be randomised into the intervention (compression) or control (no compression) group. Randomisation will be stratified by prophylactic antibiotic use. Participants will be followed up at 6 monthly intervals for up to 3 years, or until 45 episodes of cellulitis occur across the cohort. Following an episode of recurrent cellulitis, control group participants will cross-over to the intervention group. Survival analysis will be undertaken to assess the primary outcome measure of time to cellulitis recurrence. The hypotheses are that compression therapy to control lower limb chronic oedema will delay recurrent lower limb cellulitis, reduce the rate of associated hospitalisations, minimize affected limb volume and improve the quality of life of this population.

**Ethics and dissemination:** Ethics approval has been obtained from ethics committees of all relevant institutions. Results will be disseminated through relevant peer-reviewed journal articles and conference presentations.

**Trial registration number:** ACTRN12617000412336 (Australia New Zealand Clinical Trials Registry)

**ARTICLE SUMMARY****Strengths and limitations of this study**

- Randomisation of participants will be stratified by prophylactic antibiotic use to ensure antibiotic use does not confound treatment outcome.
- Due to the nature of the intervention, blinding is not feasible for participants or assessors.
- Assessment tools and methods (perometer, diagnosis of cellulitis by medical practitioners external to the trial, verification of data using the medical record or general practitioner) have been selected to minimise potential measurement bias.
- The use of broad inclusion criteria will allow for trial results to be generalised to adults across a range of settings nationally and internationally.

## Research Proposal

E.Webb

**BACKGROUND AND RATIONALE**

Cellulitis is a common acute bacterial infection of the skin and subcutaneous tissue.<sup>1</sup> The majority of cellulitis episodes (69-81%) occur in the lower limbs.<sup>2-4</sup> In Australia lower limb cellulitis is associated with significant health costs due to frequent hospital admissions and high levels of morbidity. In 2014-2015 there were 59,466 hospitalisations for cellulitis,<sup>5</sup> with the average admission lasting 4.3 days.<sup>6</sup> In 2013-2014 cellulitis was the third leading cause of potentially preventable hospital admissions, with over half of all admissions for cellulitis being considered potentially preventable.<sup>6,7</sup> Erysipelas is an infection similar to cellulitis, which typically affects more superficial tissues. As the terms erysipelas and cellulitis are often used interchangeably and most clinical studies do not differentiate between them, this paper will consider them as one entity.

Recurrence of cellulitis is common and represents a significant proportion of the disease burden. In a 3 year time frame cellulitis has been reported to recur in 29-47% of patients,<sup>8,9</sup> with a case series in Sweden finding that 13% of patients admitted for cellulitis developed two or more recurrences within 3 years.<sup>9</sup> In light of the significant recurrence rates, effective interventions which reduce recurrence could limit the disease burden and improve patient outcomes.

Oedema occurs when capillary filtration overwhelms the available lymphatic drainage<sup>10</sup>. Lymphoedema specifically refers to persistent oedema resulting from lymphatic drainage failure<sup>11</sup>. Chronic oedema is an umbrella term that refers to oedema resulting from insufficient lymphatic drainage, where the principle cause of the oedema may be increased capillary filtration and/or lymphatic drainage failure<sup>11</sup>. As such, the term chronic oedema encompasses oedema of various aetiologies, including lymphoedema. For the purpose of this trial, we will use the term chronic oedema.

Lymphoedema and chronic oedema are potent risk factors for developing lower limb cellulitis, and for its recurrence.<sup>4,8,12,13</sup> It is broadly accepted that the relationship between cellulitis and chronic oedema is a vicious cycle.<sup>8,14</sup> Chronic oedema predisposes individuals to cellulitis and with each episode of cellulitis, the lymphatic system is further impaired, increasing residual oedema and heightening risk of future cellulitis infections.<sup>14</sup> Thus chronic oedema is not only a result of cellulitis but also increases risk of recurrence.<sup>14</sup>

The standard treatment for chronic oedema includes compression therapy and skin care.<sup>15</sup> Compression bandaging can be used to reduce oedema in a limb, and daily wear of compression garments is used to control oedema. There is general consensus that in addition to antibiotic prescription, compression to manage oedema should be an adjuvant treatment for patients with

1  
2  
3 chronic oedema who are experiencing cellulitis recurrence.<sup>1 8 14 16</sup> Despite this common  
4 recommendation and the strong evidence supporting the relationship between oedema and cellulitis,  
5 there is a paucity of evidence to support the use of compression to manage chronic oedema to prevent  
6 cellulitis recurrence.  
7  
8  
9

10  
11 The time-intensive nature of compression therapy, and the fact that measuring meaningful outcomes  
12 requires lengthy assessment periods, probably contribute to the lack of research in this field. Only one  
13 study has been conducted on the impact of oedema management on cellulitis recurrence<sup>17</sup>, with a  
14 second study incidentally observing a reduction in 'infection' among patients receiving oedema  
15 management, although this was not a research objective.<sup>18</sup> While both studies support the hypothesis  
16 that oedema management decreases cellulitis recurrence, their conclusions are hampered by  
17 methodological limitations, including pre-post intervention methods, small sample sizes and change in  
18 infection rate not being specified a research objective.<sup>17 18</sup> Whilst research regarding compression  
19 therapy to prevent cellulitis recurrence is scarce, there is high quality evidence to support the use of  
20 prophylactic antibiotics. A multi-centre, double-blind, randomised controlled trial found that use of  
21 prophylactic antibiotics in patients experiencing recurrent cellulitis is effective in preventing  
22 subsequent attacks, although the effect diminishes following prophylaxis cessation.<sup>19</sup> A 2017  
23 Cochrane systematic review of interventions to prevent cellulitis identified 6 studies investigating  
24 prophylactic antibiotics, but no other randomised trials investigating other prophylactic measures such  
25 as oedema management or skin care.<sup>20</sup> Thus further research into the efficacy of prophylactic  
26 measures other than antibiotic is warranted.<sup>20</sup>  
27  
28  
29  
30  
31  
32  
33  
34  
35  
36  
37

38 The following protocol describes a randomised controlled trial (RCT) with cross-over to determine if  
39 the use of compression therapy for adults experiencing lower limb recurrent cellulitis and chronic  
40 oedema will delay cellulitis recurrence.  
41  
42  
43

#### 44 **RESEARCH HYPOTHESES**

45 The hypotheses are that compression therapy to control lower limb chronic oedema will delay  
46 recurrent lower limb cellulitis, reduce the rate of associated hospitalisations, minimize affected limb  
47 volume and improve the quality of life of this population.  
48  
49  
50  
51

#### 52 **RESEARCH OBJECTIVES**

##### 53 **Primary objective**

54 To determine if compression therapy delays the recurrence of lower limb cellulitis in adults with  
55 lower limb chronic oedema and recurrent cellulitis.  
56  
57  
58  
59

##### 60 **Secondary Objectives**

**Research Proposal**

E.Webb

To determine if, in adults with lower limb chronic oedema and recurrent cellulitis, compression therapy; (1) reduces the rate of cellulitis-related hospital presentations; (2) reduces affected leg volume; and (3) improves quality of life (QOL).

**TRIAL DESIGN**

A randomised controlled trial with cross-over will be used to assess the impact of compression therapy on clinical outcomes (time to next episode of cellulitis, rate of cellulitis-related hospital presentations, QOL and leg volume). Participants will be randomised to the intervention or control group by block randomisation using sealed opaque envelopes. As prophylactic antibiotics have been shown to influence cellulitis recurrence,<sup>19-21</sup> randomisation of participants will be stratified by prophylactic antibiotic use. Following an episode of cellulitis, participants in the control group will cross-over into the intervention group, whereas intervention group participants will remain in their original group and continue to receive compression therapy. Figure 1 shows the proposed participant allocation process.

The absence of high-quality evidence regarding the impact of compression therapy on recurrence of cellulitis means there is uncertainty as to whether it is an effective intervention, justifying the use of an RCT. While there is no high-quality evidence to support use of the compression therapy to prevent cellulitis in this patient population, it reflects the accepted expert opinion and the standard clinical practice of the institution conducting the trial. Therefore, the trial design crosses the control group participants over into the intervention group following the first episode of cellulitis to ensure no participant continues to experience recurrent cellulitis episodes without receiving the institution's standard intervention.



1  
2  
3  
4  
5  
6  
7  
8  
9  
10  
11  
12  
13  
14  
15  
16  
17  
18  
19  
20  
21  
22  
23  
24  
25  
26  
27  
28  
29  
30  
31  
32  
33  
34  
35  
36  
37  
38  
39  
40  
41  
42  
43  
44  
45  
46  
47  
48  
49  
50  
51  
52  
53  
54  
55  
56  
57  
58  
59  
60

**Figure 1:** Anticipated participant flow through trial.

For peer review only

## METHODS

### Study setting and population

The trial will be conducted at the Calvary Public Hospital Bruce (CPHB) outpatient lymphoedema clinic. Adults with lower limb chronic oedema and a history of recurrent cellulitis who meet the eligibility criteria will be recruited from the two major ACT public Hospitals (CPHB and Canberra Hospital) and general practitioners servicing the ACT and nearby NSW residents.

### Eligibility criteria

#### *Inclusion criteria*

- $\geq 18$  years of age
- $\geq 2$  episodes of cellulitis diagnosed in the same leg in the past 2 years (at the time of referral). Clinical diagnosis of cellulitis ideally will have been based on the presence of acute erythema, oedema, warmth and pain, with spreading involvement of the skin and subcutaneous tissues, malaise, and possibly fever.<sup>1 22 23</sup>
- Chronic oedema (oedema persisting  $\geq 3$  months) in the leg/s that have had recurrent cellulitis diagnosed (presence of oedema confirmed by an accredited lymphoedema therapist through interview and physical examination, including a thorough medical history combined with limb palpation and visual assessment)
- Understanding of involvement in the study as per the participant information sheet
- Provision of informed consent
- Able to attend regular scheduled appointments for the duration of the study
- Has a valid Medicare number

#### *Exclusion criteria*

- Currently wearing effective compression garments ( $\geq$  compression class 2, or compression class 1 if considered effective by a lymphoedema therapist) regularly ( $\geq 5$  days per week)
- Declines to participate or is unable to participate for whatever reason
- Receiving end of life care
- Medically unstable
- Chronic wound/ulcer, or a wound/ulcer requiring specialist treatment or treatment that prevents the use of compression garments
- Unable to wear compression (unable to don/doff garments or has a medical condition that contraindicates use of compression)

### Interventions

## Research Proposal

E.Webb

1  
2  
3 All assessments, interventions and outcome measures will be conducted by a physiotherapist or  
4 occupational therapist who meets the registration requirements for category one of the Australian  
5 National Lymphoedema Practitioners Register.<sup>24</sup>  
6  
7

8  
9 At the initial appointment eligibility will be formally checked, and those who consent to participate  
10 will undergo stratified randomisation using sealed, opaque, and identical envelopes that are  
11 sequentially numbered. Prior to randomisation, baseline measures including number of episodes of  
12 cellulitis in the 2 years prior to referral, duration of chronic oedema, referral source and demographics  
13 will be captured. Presence of identified potential risk factors for cellulitis will also be recorded,  
14 including history of tinea or other fungal infections between toes, diabetes mellitus, obesity and  
15 chronic venous insufficiency.<sup>3 4 12 25 26</sup>  
16  
17  
18  
19  
20  
21

22 At the initial appointment participants in both the control and intervention groups will receive  
23 education (verbal and written) regarding cellulitis and how to decrease the risk of recurrence.  
24 Education will include the benefits of skin care, prevention of tinea or other fungal infections between  
25 toes, maintaining a healthy body weight and regular exercise.  
26  
27  
28  
29

30 For the intervention group, the initial appointment will also be used to plan appropriate compression  
31 therapy which will be provided at subsequent appointments. Compression therapy will involve  
32 application of compression garments (compression stockings or wraps) and may or may not involve  
33 compression bandaging to minimise oedema prior to fitting of compression garments. The number of  
34 appointments necessary for provision of compression therapy will be individualised to meet  
35 participant requirements.  
36  
37  
38  
39  
40

41 Participants in both groups will be followed for up to 3 years at 6 monthly intervals (Table 1) to  
42 complete outcome measures and to continue to receive the allocated treatment (education with or  
43 without compression therapy). At each appointment the therapist will inform each participant of  
44 changes in their limb volume, providing tangible feedback to support ongoing participant attendance.  
45 Throughout the trial, participants in the intervention group may require additional appointments for  
46 compression therapy (compression bandaging, and measure for and provision of compression  
47 garments). Intervention compliance (number of days per week garments are worn) and adverse effects  
48 will be captured by self-report.  
49  
50  
51  
52  
53  
54

55 Cross-over of control group participants will be triggered upon clinician identification of cellulitis.  
56 Recurrence of cellulitis will be checked at scheduled appointments, however if a participant reports a  
57 recurrence between scheduled assessments, they will be reviewed at an additional appointment to  
58  
59  
60

record outcome measures (table 1), and to commence cross-over for control group participants. Date of cross-over will be defined as the day compression garments are initially fitted.

### Outcome measures

Table 1 shows the timeline for completion of trial activities and outcome measures.

The primary outcome is 'observed time to first episode of cellulitis recurrence'. Cellulitis recurrence will only be assessed in a leg that has been assessed as having chronic oedema, thus if cellulitis occurs in a leg that was not previously identified as having chronic oedema, the infection will not be considered a recurrence. Cellulitis will be diagnosed by medical practitioners external to the study. Date of cellulitis recurrence (and associated hospitalisation) will be gained by participant self-report and may be verified using medical records from the hospitals and/or general practitioners.

Secondary outcomes include: (1) rate of cellulitis-related hospital admissions; (2) percent change in leg volume from baseline, measured using the perometer; (3) QOL, assessed using the LYMQOL and EuroQol Five Dimension Scale (ED-5D-3L). Occurrence of cellulitis-related hospital admissions will be measured in the same manner as cellulitis recurrence.

Percent change in leg volume will be measured using a perometer, an optoelectronic imaging device designed to measure limb volume.<sup>27</sup> The perometer has excellent intra-rater reliability (ICC= 1.0, 95% CI: 0.99 to 1.00) and inter-rater reliability (ICC= 1.0, 95% CI: 0.97 to 1.00), is sensitive to changes in limb volume,<sup>28-30</sup> and is a valid measure of knee volume.<sup>27</sup> Leg volume will be measured between 53mm and 400mm height from the ground using the perometer. Monthly calibration of the perometer will be conducted using a standardised object of known volume (875ml) to minimise instrument error, ensuring consistency of this measurement device across the duration of the trial. Use of this device will also prevent potential differential measurement bias arising from lack of therapist blinding.

Where limb volume cannot be measured using the perometer, due to impaired mobility of a participant or equipment failure, summated circumferential leg measurements will be used following expert clinical guidelines. Circumferential leg measures will be taken at the mid foot, oblique ankle and at 10, 20, 30 and 40cm intervals up the leg using a measurement board. Circumferential limb measurement also has excellent intra-rater reliability (ICC=0.977-0.996, 95% CI: 0.960-0.998) and inter-rater reliability (ICC= 0.942- 0.994, 95% CI: 0.936-0.997).<sup>31</sup>

Quality of life will be measured using LYMQOL, a validated, condition-specific quality of life tool for people with lower limb lymphoedema,<sup>32</sup> and the EQ-5D-3L, a generic preference-based measure of health related quality of life that comprises of five dimensions of health.<sup>33</sup> The EQ-5D can be used

1  
2  
3 to calculate quality adjusted life years (QALYs) for the purpose of economic evaluation.<sup>33</sup> A  
4 systematic review has found the EQ-5D has good validity and responsiveness for people with skin  
5 diseases, although the tool has not been specifically validated within a population suffering  
6 cellulitis.<sup>33</sup>  
7  
8

9  
10  
11 Exploratory analysis will be conducted to test the robustness of the trial hypotheses and may include  
12 assessment of cellulitis recurrence post cross-over, intervention compliance, participant  
13 demographics, risk factors, and per protocol analysis.  
14  
15

### 16 17 **Sample size and duration of follow up**

18  
19 The sample size has been calculated for the primary objective of detecting a difference in time  
20 to cellulitis recurrence between the control and intervention groups. The sample size estimation is  
21 based upon the assumptions that the 3-year cellulitis recurrence rate in control participants  
22 is approximately 47%<sup>8</sup> and compression therapy will reduce the 3-year incidence of recurrent  
23 cellulitis by 50%.<sup>17 18</sup> Assuming that events occur at a constant rate, these assumptions correspond to a  
24 hazard ratio of 0.42. The eligibility criteria of two or more episodes of cellulitis in the same leg in the  
25 past 2 years has been used so that the trial cohort have an increased likelihood of cellulitis reoccurring  
26 during the follow up period.  
27  
28  
29  
30  
31

32  
33 It is assumed that patients will be recruited over a 2.5-year period, and the total study duration will be  
34 3.5 years. Length of participant follow up will vary based on time of enrolment. Using a sequential  
35 design software package gsDesign in R<sup>34</sup>, in order to detect a hazard ratio of 0.42 with 80% power and  
36 2.5% (1-sided) type 1 error, a total of 45 cellulitis recurrences are needed. Under the present  
37 recruitment and recurrence assumptions, we plan to recruit 162 participants (81 per arm).  
38  
39  
40  
41

42  
43 An interim analysis will be performed by a Data Monitoring Committee after 23 episodes of cellulitis.  
44 A log rank test will be used to assess group differences. If a nominal (1 sided) significance level of  
45  $p=0.003$  is detected, indicating a strong clinical effect, the study will be ceased. If the Data  
46 Monitoring Committee recommends that the study continue to 45 episodes of cellulitis, the final  
47 analysis will use a log rank test with (1-sided) significance level  $p=0.0238$ . These efficacy bounds  
48 were derived using a Hwang-Shih-DeCani spending function with  $\gamma = -4$  to preserve an overall  
49 Type I error rate of 5%.  
50  
51  
52  
53  
54

### 55 **Recruitment and enrolment of participants**

56  
57 Recruitment will be conducted over a 2.5-year period. A multi-faceted recruitment strategy will be  
58 used. In order to capture acute patients (seen in CPHB and Canberra Hospital emergency departments  
59 and wards), all patients diagnosed with lower limb cellulitis during their hospital presentation will be  
60

**Research Proposal**

E.Webb

1  
2  
3 sent information regarding the trial and how to contact the CPHB lymphoedema service if they would  
4 like to learn more information or self-refer. To recruit from the community, the study will be  
5 advertised via posters, radio and articles in various magazines and newspapers, providing information  
6 about the trial and encouraging self-referral. Education (in-services, faxes, newsletters, posters) and  
7 referral forms will be provided to recruitment sites (Canberra Hospital, CPHB, General Practices  
8 within the surrounding region) to encourage health professionals to refer patients. Patients from these  
9 sites must consent to referral to the CPHB lymphoedema service for the study, but do not need to  
10 consent to participating in the trial at time of referral.  
11  
12  
13  
14  
15  
16

17 After self-referral, a screening phone call will be conducted to check inclusion/exclusion criteria, and  
18 for those that appear to be eligible, an appointment at the service will be made with a lymphoedema  
19 therapist. At this appointment candidates will be provided with participant information and consent  
20 forms, a verbal explanation of the study and an opportunity to ask questions, prior to choosing to  
21 consent or decline to participate.  
22  
23  
24  
25  
26

27 To promote participation in the study, a free set of compression garments will be offered by a  
28 secondary sponsor. Compression garments are expensive, which can provide a barrier to treatment  
29 compliance. Participants in the intervention group will receive the free garments at intervention  
30 commencement. Participants in the control group will receive the free garments following their first  
31 cellulitis recurrence (cross-over) or upon study completion for those who do not experience  
32 recurrence.  
33  
34  
35  
36  
37

**Patient and Public Involvement:**

38 A patient centred approach was utilised to design this study. The trial design replicates the  
39 institution's standard clinical practice as closely as possible, whilst aiming to minimise additional  
40 burden to participants. Patients from the participating clinical service were surveyed to assess  
41 acceptability of the model of care undertaken by the trial. As time required to attend appointments  
42 was identified as a potential burden, the trial was designed to minimise scheduled follow-up  
43 appointments. Cost of compression therapy was identified as a likely financial burden which is  
44 minimised through provision of two sets of free compression garments and use of accessible funding  
45 schemes. Referral processes were developed to enable patients to self-refer to the trial. The cross-over  
46 design feature was chosen to ensure participants do not continue to experience episodes of recurrent  
47 cellulitis without receiving the institution's standard intervention.  
48  
49  
50  
51  
52  
53  
54  
55  
56  
57  
58  
59  
60

Table 1: Timeline per patient for RCT outcome measures

| Time Point                                                                                                            | Enrolment | Assessment post initial intervention | Assessment post cellulitis recurrence | Cross-over | 6 | 12 | 18 | 24 | 30 | 36 |
|-----------------------------------------------------------------------------------------------------------------------|-----------|--------------------------------------|---------------------------------------|------------|---|----|----|----|----|----|
| <i>Body Mass Index</i>                                                                                                | X         |                                      | X                                     | X          | X | X  | X  | X  | X  | X  |
| <u>Perometer (limb volume)</u>                                                                                        | X         | X                                    | X                                     | X          | X | X  | X  | X  | X  | X  |
| <u>Summated Limb Circumferences</u>                                                                                   | X         | X                                    | X                                     | X          | X | X  | X  | X  | X  | X  |
| <u>ED-5D-3L</u>                                                                                                       | X         |                                      |                                       |            |   | X  |    | X  |    | X  |
| <u>LYMQOL</u>                                                                                                         | X         |                                      |                                       |            | X | X  |    | X  |    | X  |
| <u>Cellulitis recurrence date/s</u>                                                                                   |           |                                      | X                                     |            | X | X  | X  | X  | X  | X  |
| <u>Hospitalisation due to cellulitis (date, length of stay)</u>                                                       |           |                                      | X                                     |            | X | X  | X  | X  | X  | X  |
| Verification of cellulitis recurrence and associated hospitalisation using medical record/general practitioner report |           |                                      | X                                     |            | X | X  | X  | X  | X  | X  |
| Intervention provided (type of garment, application of compression bandages)                                          |           | X                                    | X                                     | X          | X | X  | X  | X  | X  | X  |
| <i>Presence of fungal infections/tinea/maceration or cracking of skin between toes</i>                                |           |                                      | X                                     |            | X | X  | X  | X  | X  | X  |
| Adverse events                                                                                                        |           |                                      | X                                     |            | X | X  | X  | X  | X  | X  |
| Intervention compliance                                                                                               |           |                                      | X                                     |            | X | X  | X  | X  | X  | X  |
| <i>Occurrence of wounds/ulcers (acute/chronic)</i>                                                                    |           |                                      |                                       |            | X | X  | X  | X  | X  | X  |

Primary and secondary outcome measures have been underlined. Identified potential risk factors have been italicised.<sup>3 12</sup>

## Research Proposal

E.Webb

### Assignment of interventions and blinding

Participants will be assigned to the intervention or control group in a 1:1 allocation ratio using block randomisation, with a block size of 10. Sealed sequentially numbered opaque envelopes will be used to ensure concealed allocation. A computer-generated allocation sequence will be created and supplied by a consultant statistician and saved in a folder only accessible by administration staff.

Administration staff will prepare the sealed sequentially numbered opaque envelopes, ensuring therapists involved in participant allocation have no premature access to the letters.

Therapists will not be blinded due to practicalities of providing the intervention within a small team of 4 specialised clinicians. Further, the visible nature of the treatment and lack of feasible sham interventions prevent effective blinding of both assessors and participants. Additionally, for ethical reasons, participants will be fully informed of both the potential interventions, prior to consenting to participate.

### Data management and quality assurance

Prior to any involvement in the trial, therapists will receive training regarding trial implementation and completion of outcome measures. Refresher training will be provided to therapists annually and the trial protocol will be kept readily available.

For the duration of the study, data will be stored in identifiable form in both a locked office and on a secure access hard drive, accessible only by designated research staff. Data will be entered by a research officer or members of the research team. For quality assurance, data completeness will be reviewed annually, and all entered data will be cross-checked against written records at least once after initial entry. Following trial conclusion and prior to data analysis, all data will be de-identified. Data will be stored for a minimum of 7 years as per CPHB policy, however data may be retained for longer for identified new, ethically approved ancillary studies. A contract with the secondary sponsor ensures they will have no involvement in the study design, in the collection, analysis, and interpretation of data, in the writing of the manuscript, or in the decision to submit the manuscript for publication.

### Participant Retention

Once a participant is enrolled in the study, every effort will be made to ensure they are followed up as per the protocol. Where participants cannot attend a scheduled appointment, a phone call assessment may be completed to gain the primary outcome measure. Phone call assessment will not allow for completion of limb volume or QOL measures but will capture date of cellulitis recurrence and cellulitis-related hospitalisation.



1  
2  
3 Participants can withdraw from the study at any point. For participants that withdraw, the medical  
4 record and/or general practitioner report may be checked according to the schedule for cellulitis  
5 recurrence and cellulitis-related hospitalisation.  
6  
7

### 8 9 **Termination criteria**

10 Participants will be withdrawn from the study in the case of death, withdrawal of consent or if they  
11 develop a wound or lymphorrhea requiring compression for effective management<sup>35</sup>.  
12  
13

### 14 15 **Proposed methods for data analysis**

16 For the main outcome measure of ‘time to first episode of recurrent cellulitis’, survival analysis will  
17 be undertaken. Kaplan-Meier plots will be used to visualise patterns of time to first cellulitis  
18 recurrence between the groups, with a log rank test being used to determine if there is a statistically  
19 significant difference between the groups. Cox proportional hazards regression may also be used to  
20 adjust for important risk factors. Right censoring will be used for participants who are lost to follow  
21 up. Intention to treat analysis will be used, with all enrolled participants being assessed according to  
22 their randomisation, regardless of protocol adherence.  
23  
24  
25  
26  
27  
28  
29

30 For the secondary outcomes of percent change in limb volume and QOL, measures will be taken at  
31 multiple time points. Therefore, groups will be compared using a linear mixed model or using a  
32 repeated measures analysis. A generalized linear model will be used to assess rate of cellulitis-related  
33 hospital admissions.  
34  
35  
36  
37

### 38 **MINIMISING BIAS**

#### 39 **Selection and attrition bias**

40 Use of randomisation will minimise selection bias and confounding. Stratification will ensure use of  
41 prophylactic antibiotics is not confounded with treatment assignment. Presence and distribution of  
42 other known potential confounding factors will be measured and reported. Intention to treat analysis  
43 will be used to prevent attrition bias that may occur through loss to follow up of participants.  
44  
45  
46  
47  
48

#### 49 **Internal validity**

50 Use of an RCT and validated measurement tools support the internal validity of this research. The  
51 lack of blinding of therapists and participants has the potential to induce surveillance and recall bias  
52 and lead to differential measurement error in the reporting of cellulitis recurrence. To minimise this,  
53 accuracy of self-report of recurrence may be cross-checked with the participant’s general practitioner  
54 or medical record (from CPHB and Canberra Hospital). Diagnosis of cellulitis by doctors external to  
55 the study and use of perometry to measure limb volume will reduce the risk of measurement bias and  
56  
57  
58  
59  
60

## Research Proposal

E.Webb

thus differential measurement error. Calibration of the perometer will be performed to prevent non-differential measurement error that could result from machine error.

Control and intervention group participants have the same appointment schedule throughout the duration of the trial, however participants in the intervention group may attend more appointments than the control group. This systematic difference in clinician contact could influence participant's perceived benefit, allowing potential bias in self-reported measures (LYMQOL, EQ-5D).

Participants enrolled in the trial have a history of 2 or more episodes of cellulitis diagnosed by medical practitioners independent to the trial. As misdiagnosis of lower limb cellulitis is not uncommon<sup>36</sup>, the trial may include incorrectly diagnosed participants leading to non-differential misclassification.

### ANALYSIS OF COSTS

A within-trial cost-analysis assessment will be conducted. Data obtained from the trial and participant medical records will be used to assess the cost of oedema management and the cost of an episode of cellulitis from both an individual and a health systems perspective. Upon completion of the RCT, the cost-effectiveness and cost-utility of chronic oedema management to prevent recurrent cellulitis may be assessed.

### ETHICS AND DISSEMINATION

Ethics approval has been granted for these studies by three institutional committees:

1. Calvary Public Hospital Bruce Human Research Ethics Committee ETH.4.17.092
2. Australian Capital Territory Health Human Research Ethics Committee (53-2016)
3. University of Canberra Human Research Ethics Committee (cross-institutional approval)

Regardless of the outcome of the trial, the findings are planned to be submitted for publication in relevant peer-reviewed journals and for presentations at national and international conferences. Key findings will be disseminated to identified stakeholders, including primary contact clinicians for patients experiencing cellulitis (doctors and health professionals in acute and community settings), clinicians who manage chronic oedema and professionals who may be involved in developing relevant policy and practice. Upon request, participants will be provided with a copy of the trial results.

### DISCUSSION

Although current expert consensus recommends compression therapy to prevent the recurrence of cellulitis in patients with lower limb chronic oedema, the evidence supporting this recommendation is

## Research Proposal

E.Webb

1  
2  
3 lacking. This study aims to review the efficacy of compression therapy to allow for better informed  
4 practice and policy. Given the high incidence of cellulitis within Australia and around the world,  
5 reducing cellulitis recurrence will significantly decrease cost to the healthcare system and reduce  
6 financial and personal burden of sufferers. Further, should compression therapy reduce the recurrence  
7 of cellulitis this may limit the dependence and widespread prescription of prophylactic antibiotics.  
8 This trial will be performed on adults receiving healthcare services in the Australian Capital Territory,  
9 however the results will be relevant to cellulitis management throughout Australia and internationally.  
10  
11  
12  
13  
14  
15

**Author affiliations**

- 16 1. Physiotherapy Department, Calvary Public Hospital Bruce, Canberra, Australian Capital  
17 Territory, Australia
- 18 2. Discipline of Physiotherapy, Faculty of Health, University of Canberra, Canberra, Australian  
19 Capital Territory, Australia
- 20 3. Statistical Consulting Unit, Australian National University, Canberra, Australian Capital  
21 Territory, Australia
- 22 4. University of Canberra Research Institute for Sport and Exercise (UC-RISE), Canberra,  
23 Australia.
- 24 5. Medical Stream, Calvary Public Hospital Bruce, Canberra, Australian Capital Territory,  
25 Australia
- 26 6. Infectious Diseases Unit, Canberra Hospital, Canberra, Australian Capital Territory, Australia
- 27 7. Medical School, Australian National University, Canberra, Australian Capital Territory,  
28 Australia
- 29 8. Australian Institute of Health Innovation, Macquarie University, Sydney, New South Wales,  
30 Australia.  
31  
32  
33  
34  
35  
36  
37  
38  
39  
40  
41  
42

43 **Acknowledgements** The Calvary Public Hospital Bruce Lymphoedema Team, specifically Gemma  
44 Arnold, Marie-Michelle Coulombe, Ingrid Thé, Abby Benton, Emma May, Sarah Squires,  
45 Caitlin Norris, Nievelle Chand, Sarah Toohey, Ashlee Cashion and Bhavleen Singh.  
46

47 **Author contributions** EW: trial design and implementation, contribution of original material, editing  
48 and approval of final manuscript. BB: trial implementation support and contribution of original  
49 material. TN: trial design input and statistical support. VM: economic analysis support. BB, TN,  
50 JG, FB and VM provided supervision, contributed to refinement of the protocol, and approved  
51 the final manuscript.  
52  
53

54 **Funding** Calvary Public Hospital Bruce is the primary sponsor, funding clinician time to initiate and  
55 manage the trial. Haddenham Healthcare is a secondary sponsor, providing two sets of free  
56 compression garments for each trial participant. Haddenham Healthcare had no role in designing this  
57  
58  
59  
60

## Research Proposal

E.Webb

1  
2  
3 study, and will not be involved in the trial implementation, analyses, data interpretation, or  
4 publication or dissemination of results. Haddenham Healthcare will not have access to trial data.

5  
6 **Competing interests** None

7  
8 **Ethics approval** The Human Research Ethics Committees of Calvary Public Hospital Bruce,  
9 Australian Capital Territory Health and University of Canberra all approved this trial.

10  
11 **Provenance and peer review** Not commissioned; externally peer reviewed

12  
13 **Trial status** The ICTOC trial is currently in progress. Participant recruitment started in May 2017 and  
14 is expected to continue until December 2019.  
15  
16  
17  
18  
19  
20  
21  
22  
23  
24  
25  
26  
27  
28  
29  
30  
31  
32  
33  
34  
35  
36  
37  
38  
39  
40  
41  
42  
43  
44  
45  
46  
47  
48  
49  
50  
51  
52  
53  
54  
55  
56  
57  
58  
59  
60

For peer review only

## REFERENCES

1. Swartz MN. Clinical practice. Cellulitis. *N Engl J Med* 2004;350:904-12. doi: 10.1056/NEJMc031807 [published Online First: 2004/02/27]
2. Eriksson B, Jorup-Rönström C, Karkkonen K, et al. Erysipelas: clinical and bacteriologic spectrum and serological aspects. *Clin Infect Dis* 1996;23:1091-98.
3. Pavlotsky F, Amrani S, Trau H. Recurrent erysipelas: risk factors. *J Dtsch Dermatol Ges* 2004;2:89-95.
4. Inghammar M, Rasmussen M, Linder A. Recurrent erysipelas-risk factors and clinical presentation. *BMC Infect Dis* 2014;14:270-70. doi: 10.1186/1471-2334-14-270
5. The Australian Commission on Safety and Quality in Healthcare. Australian Atlas of Healthcare Variation 2017, 2017:81-90.
6. National Health Performance Authority. Healthy Communities: Potentially preventable hospitalisations in 2013–14. 2015
7. National Health Performance Authority. Hospital Performance: Costs of acute admitted patients in public hospitals in 2011–12, 2015.
8. Cox NH. Oedema as a risk factor for multiple episodes of cellulitis/erysipelas of the lower leg: a series with community follow-up. *Br J Dermatol* 2006;155:947-50. doi: doi:10.1111/j.1365-2133.2006.07419.x
9. Jorup-Ronstrom C, Britton S. Recurrent erysipelas: predisposing factors and costs of prophylaxis. *Infection* 1987;15:105-6. [published Online First: 1987/03/01]
10. Mortimer PS, Levick JR. Chronic peripheral oedema: the critical role of the lymphatic system. *Clini Med (Lond)* 2004;4:448-53.
11. Moffatt C, Keeley V, Quere I. The Concept of Chronic Edema-A Neglected Public Health Issue and an International Response: The LIMPRINT Study. *Lymphat Res Biol* 2019;17:121-26. doi: 10.1089/lrb.2018.0085 [published Online First: 2019/04/18]
12. Dupuy A, Benchikhi H, Roujeau JC, et al. Risk factors for erysipelas of the leg (cellulitis): case-control study. *BMJ* 1999;318(7198):1591-4. [published Online First: 1999/06/11]
13. Karppelein M, Siljander T, Vuopio-Varkila J, et al. Factors predisposing to acute and recurrent bacterial non-necrotizing cellulitis in hospitalized patients: a prospective case-control study. *Clin Microbiol Infect* 2010;16:729-34. doi: 10.1111/j.1469-0691.2009.02906.x
14. Chlebicki MP, Oh CC. Recurrent cellulitis: risk factors, etiology, pathogenesis and treatment. *Curr Infect Dis Rep* 2014;16:422. doi: 10.1007/s11908-014-0422-0 [published Online First: 2014/07/02]
15. Todd M. Chronic oedema: impact and management. *Br J Nurs* 2013;22:623-7. doi: 10.12968/bjon.2013.22.11.623 [published Online First: 2013/08/01]
16. Cox NH, Colver GB, Paterson WD. Management and morbidity of cellulitis of the leg. *J R Soc Med* 1998;91:634-7. [published Online First: 2000/03/24]

## Research Proposal

E.Webb

17. Arsenault K, Rielly L, Wise H. Effects of Complete Decongestive Therapy on the Incidence Rate of Hospitalization for the Management of Recurrent Cellulitis in Adults with Lymphedema. *Rehabil Oncol* 2011;29:14-20.
18. Ko DS, Lerner R, Klose G, et al. Effective treatment of lymphedema of the extremities. *Arch Surg* 1998;133:452-8. [published Online First: 1998/05/23]
19. Thomas KS, Crook AM, Nunn AJ, et al. Penicillin to prevent recurrent leg cellulitis. *N Engl J Med* 2013;368:1695-703. doi: 10.1056/NEJMoa1206300
20. Dalal A, Eskin-Schwartz M, Mimouni D, et al. Interventions for the prevention of recurrent erysipelas and cellulitis. *Cochrane Database of Systematic Reviews* 2017; 6. Doi: 10.1002/14651858.CD009758
21. Thomas K, Crook A, Foster K, et al. Prophylactic antibiotics for the prevention of cellulitis (erysipelas) of the leg: results of the UK Dermatology Clinical Trials Network's PATCH II trial. *Br J Dermatol* 2012;166:169-78. doi: 10.1111/j.1365-2133.2011.10586.x
22. Sullivan T, de Barra E. Diagnosis and management of cellulitis. *Clin Med (Lond)* 2018;18:160-63. doi: 10.7861/clinmedicine.18-2-160 [published Online First: 2018/04/08]
23. Raff AB, Kroshinsky D. Cellulitis: A Review. *JAMA* 2016;316:325-37. doi: 10.1001/jama.2016.8825. [published Online First: 2016/07/21]
24. Australasian Lymphology Association. About the National Lymphoedema Practitioners Register [Website]. 2018 <http://www.lymphoedema.org.au/the-register-updated> (accessed September 2018)
25. Carratala J, Roson B, Fernandez-Sabe N, et al. Factors associated with complications and mortality in adult patients hospitalized for infectious cellulitis. *Eur J Clin Microbiol Infect Dis* 2003;22:151-7. doi: 10.1007/s10096-003-0902-x [published Online First: 2003/03/22]
26. Nassaji M, Ghorbani R, Ghashghaee S. Risk factors of acute cellulitis in adult patients: A case-control study. *EJM* 2016;21:26-30. doi: 10.5505/ejm.2016.95605
27. Man IO, Markland KL, Morrissey MC. The validity and reliability of the Perometer in evaluating human knee volume. *Clin Physiol Funct Imaging* 2004;24:352-8. doi: 10.1111/j.1475-097X.2004.00577.x [published Online First: 2004/11/04]
28. Czerniec S, Ward L, Lee M-J, et al. Segmental measurement of breast cancer-related arm lymphoedema using perometry and bioimpedance spectroscopy. *Support Care Cancer* 2010;19:703-10. doi: 10.1007/s00520-010-0896-8
29. Czerniec SA, Ward LC, Refshauge KM, et al. Assessment of breast cancer-related arm lymphedema-comparison of physical measurement methods and self-report. *Cancer Invest* 2010;28:54-62. doi: 10.3109/07357900902918494 [published Online First: 2009/11/18]
30. Bulley C, Coutts F, Tan C-W. Perometry limb volume measurement: Protocol development and reliability *Eur J Physiother* 2013;15 doi: 10.3109/21679169.2013.831482

## Research Proposal

E.Webb

- 1  
2  
3 31. Devoogdt N, Lemkens H, Geraerts I, et al. A new device to measure upper limb circumferences:  
4 validity and reliability. *Int Angiol* 2010;29:401-7. [published Online First: 2010/10/07]  
5  
6 32. Keeley V, Crooks S, Locke J, et al. A quality of life measure for limb lymphoedema (LYMQOL).  
7 *J lymphoedema* 2010;5:26-37.  
8  
9 33. Yang Y, Brazier J, Longworth L. EQ-5D in skin conditions: an assessment of validity and  
10 responsiveness. *Eur J Health Econ* 2015;16:927-39. doi: 10.1007/s10198-014-0638-9  
11 [published Online First: 2014/11/02]  
12  
13 34. R Core Team. R: A language and environment for statistical computing: R Foundation for  
14 Statistical Computing, Vienna, Austria. 2018 <https://www.R-project.org> (accessed December  
15 2018)  
16  
17 35. O'Meara S, Cullum N, Nelson EA, et al. Compression for venous leg ulcers. *Cochrane Database*  
18 *of Systematic Reviews* 2012(11) doi: 10.1002/14651858.CD000265.pub3  
19  
20 36. Weng QY, Raff AB, Cohen JM, et al. Costs and Consequences Associated With Misdiagnosed  
21 Lower Extremity Cellulitis. *JAMA Dermatol* 2017;153:141-46. doi:  
22 10.1001/jamadermatol.2016.3816 [published Online First: 2016/11/03]  
23  
24  
25  
26  
27  
28  
29  
30  
31  
32  
33  
34  
35  
36  
37  
38  
39  
40  
41  
42  
43  
44  
45  
46  
47  
48  
49  
50  
51  
52  
53  
54  
55  
56  
57  
58  
59  
60

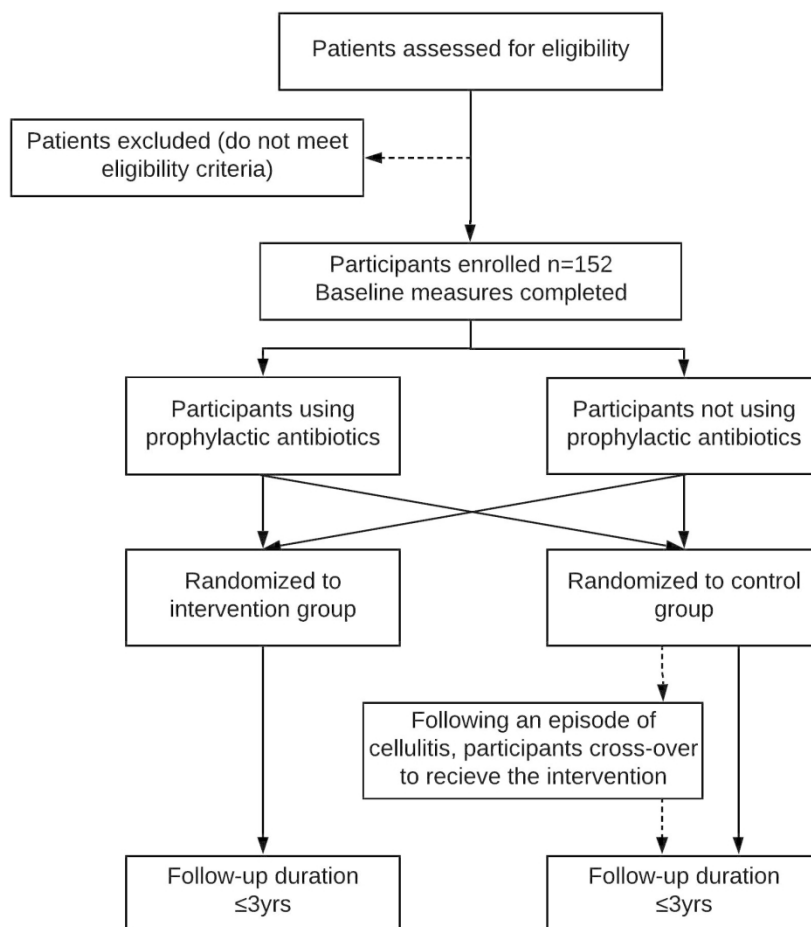

Figure 1: Anticipated participant flow through trial.

165x164mm (300 x 300 DPI)



# Reporting checklist for protocol of a clinical trial.

Based on the SPIRIT guidelines.

## Instructions to authors

Complete this checklist by entering the page numbers from your manuscript where readers will find each of the items listed below.

Your article may not currently address all the items on the checklist. Please modify your text to include the missing information. If you are certain that an item does not apply, please write "n/a" and provide a short explanation.

Upload your completed checklist as an extra file when you submit to a journal.

In your methods section, say that you used the SPIRIT reporting guidelines, and cite them as:

Chan A-W, Tetzlaff JM, Altman DG, Laupacis A, Gøtzsche PC, Krleža-Jerić K, Hróbjartsson A, Mann H, Dickersin K, Berlin J, Doré C, Parulekar W, Summerskill W, Groves T, Schulz K, Sox H, Rockhold FW, Rennie D, Moher D. SPIRIT 2013 Statement: Defining standard protocol items for clinical trials. *Ann Intern Med.* 2013;158(3):200-207

|                    |                     | Reporting Item                                                                                               | Page Number |
|--------------------|---------------------|--------------------------------------------------------------------------------------------------------------|-------------|
| Title              | <a href="#">#1</a>  | Descriptive title identifying the study design, population, interventions, and, if applicable, trial acronym | 1           |
| Trial registration | <a href="#">#2a</a> | Trial identifier and registry name. If not yet registered, name of intended registry                         | 2           |

|    |                     |                     |                                                          |       |
|----|---------------------|---------------------|----------------------------------------------------------|-------|
| 1  | Trial registration: | <a href="#">#2b</a> | All items from the World Health Organization Trial       | NA    |
| 2  |                     |                     |                                                          |       |
| 3  | data set            |                     | Registration Data Set                                    |       |
| 4  |                     |                     |                                                          |       |
| 5  |                     |                     |                                                          |       |
| 6  | Protocol version    | <a href="#">#3</a>  | Date and version identifier                              | 2     |
| 7  |                     |                     |                                                          |       |
| 8  |                     |                     |                                                          |       |
| 9  | Funding             | <a href="#">#4</a>  | Sources and types of financial, material, and other      | 16    |
| 10 |                     |                     | support                                                  |       |
| 11 |                     |                     |                                                          |       |
| 12 |                     |                     |                                                          |       |
| 13 |                     |                     |                                                          |       |
| 14 | Roles and           | <a href="#">#5a</a> | Names, affiliations, and roles of protocol contributors  | 16    |
| 15 |                     |                     |                                                          |       |
| 16 | responsibilities:   |                     |                                                          |       |
| 17 |                     |                     |                                                          |       |
| 18 | contributorship     |                     |                                                          |       |
| 19 |                     |                     |                                                          |       |
| 20 | Roles and           | <a href="#">#5b</a> | Name and contact information for the trial sponsor       | 1,16  |
| 21 |                     |                     |                                                          |       |
| 22 | responsibilities:   |                     |                                                          |       |
| 23 |                     |                     |                                                          |       |
| 24 | sponsor contact     |                     |                                                          |       |
| 25 |                     |                     |                                                          |       |
| 26 | information         |                     |                                                          |       |
| 27 |                     |                     |                                                          |       |
| 28 | Roles and           | <a href="#">#5c</a> | Role of study sponsor and funders, if any, in study      | 13,16 |
| 29 |                     |                     |                                                          |       |
| 30 | responsibilities:   |                     | design; collection, management, analysis, and            |       |
| 31 |                     |                     | interpretation of data; writing of the report; and the   |       |
| 32 | sponsor and funder  |                     | decision to submit the report for publication, including |       |
| 33 |                     |                     | whether they will have ultimate authority over any of    |       |
| 34 |                     |                     | these activities                                         |       |
| 35 |                     |                     |                                                          |       |
| 36 |                     |                     |                                                          |       |
| 37 | Roles and           | <a href="#">#5d</a> | Composition, roles, and responsibilities of the          | 10    |
| 38 |                     |                     |                                                          |       |
| 39 | responsibilities:   |                     | coordinating centre, steering committee, endpoint        |       |
| 40 |                     |                     | adjudication committee, data management team, and        |       |
| 41 | committees          |                     | other individuals or groups overseeing the trial, if     |       |
| 42 |                     |                     |                                                          |       |
| 43 |                     |                     |                                                          |       |
| 44 |                     |                     |                                                          |       |
| 45 |                     |                     |                                                          |       |
| 46 |                     |                     |                                                          |       |
| 47 |                     |                     |                                                          |       |
| 48 |                     |                     |                                                          |       |
| 49 |                     |                     |                                                          |       |
| 50 |                     |                     |                                                          |       |
| 51 |                     |                     |                                                          |       |
| 52 |                     |                     |                                                          |       |
| 53 |                     |                     |                                                          |       |
| 54 |                     |                     |                                                          |       |
| 55 |                     |                     |                                                          |       |
| 56 |                     |                     |                                                          |       |
| 57 |                     |                     |                                                          |       |
| 58 |                     |                     |                                                          |       |
| 59 |                     |                     |                                                          |       |
| 60 |                     |                     |                                                          |       |

1 applicable (see Item 21a for data monitoring  
2  
3 committee)

|    |                      |                     |                                                           |
|----|----------------------|---------------------|-----------------------------------------------------------|
| 4  |                      |                     |                                                           |
| 5  |                      |                     |                                                           |
| 6  | Background and       | <a href="#">#6a</a> | Description of research question and justification for    |
| 7  |                      |                     |                                                           |
| 8  | rationale            |                     | undertaking the trial, including summary of relevant      |
| 9  |                      |                     |                                                           |
| 10 |                      |                     | studies (published and unpublished) examining             |
| 11 |                      |                     |                                                           |
| 12 |                      |                     | benefits and harms for each intervention                  |
| 13 |                      |                     |                                                           |
| 14 |                      |                     |                                                           |
| 15 | Background and       | <a href="#">#6b</a> | Explanation for choice of comparators                     |
| 16 |                      |                     |                                                           |
| 17 | rationale: choice of |                     |                                                           |
| 18 |                      |                     |                                                           |
| 19 | comparators          |                     |                                                           |
| 20 |                      |                     |                                                           |
| 21 |                      |                     |                                                           |
| 22 |                      |                     |                                                           |
| 23 | Objectives           | <a href="#">#7</a>  | Specific objectives or hypotheses                         |
| 24 |                      |                     |                                                           |
| 25 |                      |                     |                                                           |
| 26 | Trial design         | <a href="#">#8</a>  | Description of trial design including type of trial (eg,  |
| 27 |                      |                     |                                                           |
| 28 |                      |                     | parallel group, crossover, factorial, single group),      |
| 29 |                      |                     |                                                           |
| 30 |                      |                     | allocation ratio, and framework (eg, superiority,         |
| 31 |                      |                     |                                                           |
| 32 |                      |                     | equivalence, non-inferiority, exploratory)                |
| 33 |                      |                     |                                                           |
| 34 |                      |                     |                                                           |
| 35 |                      |                     |                                                           |
| 36 | Study setting        | <a href="#">#9</a>  | Description of study settings (eg, community clinic,      |
| 37 |                      |                     |                                                           |
| 38 |                      |                     | academic hospital) and list of countries where data       |
| 39 |                      |                     |                                                           |
| 40 |                      |                     | will be collected. Reference to where list of study sites |
| 41 |                      |                     |                                                           |
| 42 |                      |                     | can be obtained                                           |
| 43 |                      |                     |                                                           |
| 44 |                      |                     |                                                           |
| 45 |                      |                     |                                                           |
| 46 | Eligibility criteria | <a href="#">#10</a> | Inclusion and exclusion criteria for participants. If     |
| 47 |                      |                     |                                                           |
| 48 |                      |                     | applicable, eligibility criteria for study centres and    |
| 49 |                      |                     |                                                           |
| 50 |                      |                     | individuals who will perform the interventions (eg,       |
| 51 |                      |                     |                                                           |
| 52 |                      |                     | surgeons, psychotherapists)                               |
| 53 |                      |                     |                                                           |
| 54 |                      |                     |                                                           |
| 55 |                      |                     |                                                           |
| 56 |                      |                     |                                                           |
| 57 |                      |                     |                                                           |
| 58 |                      |                     |                                                           |
| 59 |                      |                     |                                                           |
| 60 |                      |                     |                                                           |

|    |                      |                      |                                                         |          |
|----|----------------------|----------------------|---------------------------------------------------------|----------|
| 1  | Interventions:       | <a href="#">#11a</a> | Interventions for each group with sufficient detail to  | 7,8      |
| 2  |                      |                      |                                                         |          |
| 3  | description          |                      | allow replication, including how and when they will be  |          |
| 4  |                      |                      | administered                                            |          |
| 5  |                      |                      |                                                         |          |
| 6  |                      |                      |                                                         |          |
| 7  |                      |                      |                                                         |          |
| 8  | Interventions:       | <a href="#">#11b</a> | Criteria for discontinuing or modifying allocated       | 6,8      |
| 9  |                      |                      |                                                         |          |
| 10 | modifications        |                      | interventions for a given trial participant (eg, drug   |          |
| 11 |                      |                      | dose change in response to harms, participant           |          |
| 12 |                      |                      | request, or improving / worsening disease)              |          |
| 13 |                      |                      |                                                         |          |
| 14 |                      |                      |                                                         |          |
| 15 |                      |                      |                                                         |          |
| 16 |                      |                      |                                                         |          |
| 17 |                      |                      |                                                         |          |
| 18 | Interventions:       | <a href="#">#11c</a> | Strategies to improve adherence to intervention         | 8, 11,12 |
| 19 |                      |                      |                                                         |          |
| 20 | adherence            |                      | protocols, and any procedures for monitoring            |          |
| 21 |                      |                      | adherence (eg, drug tablet return; laboratory tests)    |          |
| 22 |                      |                      |                                                         |          |
| 23 |                      |                      |                                                         |          |
| 24 |                      |                      |                                                         |          |
| 25 |                      |                      |                                                         |          |
| 26 | Interventions:       | <a href="#">#11d</a> | Relevant concomitant care and interventions that are    | 8        |
| 27 |                      |                      |                                                         |          |
| 28 | concomitant care     |                      | permitted or prohibited during the trial                |          |
| 29 |                      |                      |                                                         |          |
| 30 |                      |                      |                                                         |          |
| 31 | Outcomes             | <a href="#">#12</a>  | Primary, secondary, and other outcomes, including       | 9,12     |
| 32 |                      |                      |                                                         |          |
| 33 |                      |                      | the specific measurement variable (eg, systolic blood   |          |
| 34 |                      |                      | pressure), analysis metric (eg, change from baseline,   |          |
| 35 |                      |                      | final value, time to event), method of aggregation (eg, |          |
| 36 |                      |                      | median, proportion), and time point for each outcome.   |          |
| 37 |                      |                      |                                                         |          |
| 38 |                      |                      |                                                         |          |
| 39 |                      |                      |                                                         |          |
| 40 |                      |                      |                                                         |          |
| 41 |                      |                      |                                                         |          |
| 42 |                      |                      |                                                         |          |
| 43 |                      |                      | Explanation of the clinical relevance of chosen         |          |
| 44 |                      |                      |                                                         |          |
| 45 |                      |                      | efficacy and harm outcomes is strongly recommended      |          |
| 46 |                      |                      |                                                         |          |
| 47 |                      |                      |                                                         |          |
| 48 | Participant timeline | <a href="#">#13</a>  | Time schedule of enrolment, interventions (including    | 6,8,10   |
| 49 |                      |                      |                                                         |          |
| 50 |                      |                      | any run-ins and washouts), assessments, and visits      |          |
| 51 |                      |                      |                                                         |          |
| 52 |                      |                      |                                                         |          |
| 53 |                      |                      | for participants. A schematic diagram is highly         |          |
| 54 |                      |                      |                                                         |          |
| 55 |                      |                      | recommended (see Figure)                                |          |
| 56 |                      |                      |                                                         |          |
| 57 |                      |                      |                                                         |          |
| 58 |                      |                      |                                                         |          |
| 59 |                      |                      |                                                         |          |
| 60 |                      |                      |                                                         |          |

|    |                    |                      |                                                           |         |
|----|--------------------|----------------------|-----------------------------------------------------------|---------|
| 1  | Sample size        | <a href="#">#14</a>  | Estimated number of participants needed to achieve        | 10      |
| 2  |                    |                      | study objectives and how it was determined, including     |         |
| 3  |                    |                      | clinical and statistical assumptions supporting any       |         |
| 4  |                    |                      | sample size calculations                                  |         |
| 5  |                    |                      |                                                           |         |
| 6  |                    |                      |                                                           |         |
| 7  |                    |                      |                                                           |         |
| 8  |                    |                      |                                                           |         |
| 9  |                    |                      |                                                           |         |
| 10 |                    |                      |                                                           |         |
| 11 | Recruitment        | <a href="#">#15</a>  | Strategies for achieving adequate participant             | 10,11   |
| 12 |                    |                      | enrolment to reach target sample size                     |         |
| 13 |                    |                      |                                                           |         |
| 14 |                    |                      |                                                           |         |
| 15 |                    |                      |                                                           |         |
| 16 | Allocation:        | <a href="#">#16a</a> | Method of generating the allocation sequence (eg,         | 13      |
| 17 | sequence           |                      | computer-generated random numbers), and list of any       |         |
| 18 |                    |                      | factors for stratification. To reduce predictability of a |         |
| 19 | generation         |                      | random sequence, details of any planned restriction       |         |
| 20 |                    |                      | (eg, blocking) should be provided in a separate           |         |
| 21 |                    |                      | document that is unavailable to those who enrol           |         |
| 22 |                    |                      | participants or assign interventions                      |         |
| 23 |                    |                      |                                                           |         |
| 24 |                    |                      |                                                           |         |
| 25 |                    |                      |                                                           |         |
| 26 |                    |                      |                                                           |         |
| 27 |                    |                      |                                                           |         |
| 28 |                    |                      |                                                           |         |
| 29 |                    |                      |                                                           |         |
| 30 |                    |                      |                                                           |         |
| 31 |                    |                      |                                                           |         |
| 32 |                    |                      |                                                           |         |
| 33 | Allocation         | <a href="#">#16b</a> | Mechanism of implementing the allocation sequence         | 13      |
| 34 | concealment        |                      | (eg, central telephone; sequentially numbered,            |         |
| 35 |                    |                      | opaque, sealed envelopes), describing any steps to        |         |
| 36 | mechanism          |                      | conceal the sequence until interventions are assigned     |         |
| 37 |                    |                      |                                                           |         |
| 38 |                    |                      |                                                           |         |
| 39 |                    |                      |                                                           |         |
| 40 |                    |                      |                                                           |         |
| 41 |                    |                      |                                                           |         |
| 42 |                    |                      |                                                           |         |
| 43 | Allocation:        | <a href="#">#16c</a> | Who will generate the allocation sequence, who will       | 13, 7-8 |
| 44 | implementation     |                      | enrol participants, and who will assign participants to   |         |
| 45 |                    |                      | interventions                                             |         |
| 46 |                    |                      |                                                           |         |
| 47 |                    |                      |                                                           |         |
| 48 |                    |                      |                                                           |         |
| 49 |                    |                      |                                                           |         |
| 50 |                    |                      |                                                           |         |
| 51 | Blinding (masking) | <a href="#">#17a</a> | Who will be blinded after assignment to interventions     | 13      |
| 52 |                    |                      | (eg, trial participants, care providers, outcome          |         |
| 53 |                    |                      | assessors, data analysts), and how                        |         |
| 54 |                    |                      |                                                           |         |
| 55 |                    |                      |                                                           |         |
| 56 |                    |                      |                                                           |         |
| 57 |                    |                      |                                                           |         |
| 58 |                    |                      |                                                           |         |
| 59 |                    |                      |                                                           |         |
| 60 |                    |                      |                                                           |         |

|    |                       |                      |                                                              |       |
|----|-----------------------|----------------------|--------------------------------------------------------------|-------|
| 1  | Blinding (masking):   | <a href="#">#17b</a> | If blinded, circumstances under which unblinding is          | NA    |
| 2  |                       |                      |                                                              |       |
| 3  | emergency             |                      | permissible, and procedure for revealing a                   |       |
| 4  |                       |                      |                                                              |       |
| 5  | unblinding            |                      | participant's allocated intervention during the trial        |       |
| 6  |                       |                      |                                                              |       |
| 7  |                       |                      |                                                              |       |
| 8  | Data collection plan  | <a href="#">#18a</a> | Plans for assessment and collection of outcome,              | 13,9  |
| 9  |                       |                      |                                                              |       |
| 10 |                       |                      | baseline, and other trial data, including any related        |       |
| 11 |                       |                      |                                                              |       |
| 12 |                       |                      | processes to promote data quality (eg, duplicate             |       |
| 13 |                       |                      |                                                              |       |
| 14 |                       |                      | measurements, training of assessors) and a                   |       |
| 15 |                       |                      |                                                              |       |
| 16 |                       |                      | description of study instruments (eg, questionnaires,        |       |
| 17 |                       |                      |                                                              |       |
| 18 |                       |                      | laboratory tests) along with their reliability and validity, |       |
| 19 |                       |                      |                                                              |       |
| 20 |                       |                      | if known. Reference to where data collection forms           |       |
| 21 |                       |                      |                                                              |       |
| 22 |                       |                      | can be found, if not in the protocol                         |       |
| 23 |                       |                      |                                                              |       |
| 24 |                       |                      |                                                              |       |
| 25 |                       |                      |                                                              |       |
| 26 |                       |                      |                                                              |       |
| 27 |                       |                      |                                                              |       |
| 28 | Data collection plan: | <a href="#">#18b</a> | Plans to promote participant retention and complete          | 13-14 |
| 29 | retention             |                      | follow-up, including list of any outcome data to be          |       |
| 30 |                       |                      |                                                              |       |
| 31 |                       |                      | collected for participants who discontinue or deviate        |       |
| 32 |                       |                      |                                                              |       |
| 33 |                       |                      | from intervention protocols                                  |       |
| 34 |                       |                      |                                                              |       |
| 35 |                       |                      |                                                              |       |
| 36 |                       |                      |                                                              |       |
| 37 | Data management       | <a href="#">#19</a>  | Plans for data entry, coding, security, and storage,         | 13    |
| 38 |                       |                      |                                                              |       |
| 39 |                       |                      | including any related processes to promote data              |       |
| 40 |                       |                      |                                                              |       |
| 41 |                       |                      | quality (eg, double data entry; range checks for data        |       |
| 42 |                       |                      |                                                              |       |
| 43 |                       |                      | values). Reference to where details of data                  |       |
| 44 |                       |                      |                                                              |       |
| 45 |                       |                      | management procedures can be found, if not in the            |       |
| 46 |                       |                      |                                                              |       |
| 47 |                       |                      | protocol                                                     |       |
| 48 |                       |                      |                                                              |       |
| 49 |                       |                      |                                                              |       |
| 50 |                       |                      |                                                              |       |
| 51 |                       |                      |                                                              |       |
| 52 | Statistics: outcomes  | <a href="#">#20a</a> | Statistical methods for analysing primary and                | 14    |
| 53 |                       |                      |                                                              |       |
| 54 |                       |                      | secondary outcomes. Reference to where other                 |       |
| 55 |                       |                      |                                                              |       |
| 56 |                       |                      |                                                              |       |
| 57 |                       |                      |                                                              |       |
| 58 |                       |                      |                                                              |       |
| 59 |                       |                      |                                                              |       |
| 60 |                       |                      |                                                              |       |

|    |                        |                                                                             |    |
|----|------------------------|-----------------------------------------------------------------------------|----|
| 1  |                        | details of the statistical analysis plan can be found, if                   |    |
| 2  |                        |                                                                             |    |
| 3  |                        | not in the protocol                                                         |    |
| 4  |                        |                                                                             |    |
| 5  |                        |                                                                             |    |
| 6  | Statistics: additional | <a href="#">#20b</a> Methods for any additional analyses (eg, subgroup      | 14 |
| 7  |                        |                                                                             |    |
| 8  | analyses               | and adjusted analyses)                                                      |    |
| 9  |                        |                                                                             |    |
| 10 |                        |                                                                             |    |
| 11 | Statistics: analysis   | <a href="#">#20c</a> Definition of analysis population relating to protocol | 14 |
| 12 |                        |                                                                             |    |
| 13 | population and         | non-adherence (eg, as randomised analysis), and any                         |    |
| 14 |                        |                                                                             |    |
| 15 | missing data           | statistical methods to handle missing data (eg,                             |    |
| 16 |                        | multiple imputation)                                                        |    |
| 17 |                        |                                                                             |    |
| 18 |                        |                                                                             |    |
| 19 |                        |                                                                             |    |
| 20 |                        |                                                                             |    |
| 21 | Data monitoring:       | <a href="#">#21a</a> Composition of data monitoring committee (DMC);        | 10 |
| 22 |                        |                                                                             |    |
| 23 | formal committee       | summary of its role and reporting structure; statement                      |    |
| 24 |                        |                                                                             |    |
| 25 |                        | of whether it is independent from the sponsor and                           |    |
| 26 |                        | competing interests; and reference to where further                         |    |
| 27 |                        | details about its charter can be found, if not in the                       |    |
| 28 |                        | protocol. Alternatively, an explanation of why a DMC                        |    |
| 29 |                        | is not needed                                                               |    |
| 30 |                        |                                                                             |    |
| 31 |                        |                                                                             |    |
| 32 |                        |                                                                             |    |
| 33 |                        |                                                                             |    |
| 34 |                        |                                                                             |    |
| 35 |                        |                                                                             |    |
| 36 |                        |                                                                             |    |
| 37 |                        |                                                                             |    |
| 38 | Data monitoring:       | <a href="#">#21b</a> Description of any interim analyses and stopping       | 10 |
| 39 |                        |                                                                             |    |
| 40 | interim analysis       | guidelines, including who will have access to these                         |    |
| 41 |                        |                                                                             |    |
| 42 |                        | interim results and make the final decision to                              |    |
| 43 |                        | terminate the trial                                                         |    |
| 44 |                        |                                                                             |    |
| 45 |                        |                                                                             |    |
| 46 |                        |                                                                             |    |
| 47 | Harms                  | <a href="#">#22</a> Plans for collecting, assessing, reporting, and         | 8  |
| 48 |                        |                                                                             |    |
| 49 |                        | managing solicited and spontaneously reported                               |    |
| 50 |                        |                                                                             |    |
| 51 |                        | adverse events and other unintended effects of trial                        |    |
| 52 |                        |                                                                             |    |
| 53 |                        | interventions or trial conduct                                              |    |
| 54 |                        |                                                                             |    |
| 55 |                        |                                                                             |    |
| 56 |                        |                                                                             |    |
| 57 |                        |                                                                             |    |
| 58 |                        |                                                                             |    |
| 59 |                        |                                                                             |    |
| 60 |                        |                                                                             |    |

|    |                    |                      |                                                         |          |
|----|--------------------|----------------------|---------------------------------------------------------|----------|
| 1  | Auditing           | <a href="#">#23</a>  | Frequency and procedures for auditing trial conduct, if | NA       |
| 2  |                    |                      | any, and whether the process will be independent        |          |
| 3  |                    |                      | from investigators and the sponsor                      |          |
| 4  |                    |                      |                                                         |          |
| 5  |                    |                      |                                                         |          |
| 6  |                    |                      |                                                         |          |
| 7  |                    |                      |                                                         |          |
| 8  |                    |                      |                                                         |          |
| 9  | Research ethics    | <a href="#">#24</a>  | Plans for seeking research ethics committee /           | 15       |
| 10 |                    |                      | institutional review board (REC / IRB) approval         |          |
| 11 | approval           |                      |                                                         |          |
| 12 |                    |                      |                                                         |          |
| 13 |                    |                      |                                                         |          |
| 14 | Protocol           | <a href="#">#25</a>  | Plans for communicating important protocol              | NA       |
| 15 |                    |                      | modifications (eg, changes to eligibility criteria,     |          |
| 16 | amendments         |                      | outcomes, analyses) to relevant parties (eg,            |          |
| 17 |                    |                      | investigators, REC / IRBs, trial participants, trial    |          |
| 18 |                    |                      | registries, journals, regulators)                       |          |
| 19 |                    |                      |                                                         |          |
| 20 |                    |                      |                                                         |          |
| 21 |                    |                      |                                                         |          |
| 22 |                    |                      |                                                         |          |
| 23 |                    |                      |                                                         |          |
| 24 |                    |                      |                                                         |          |
| 25 |                    |                      |                                                         |          |
| 26 | Consent or assent  | <a href="#">#26a</a> | Who will obtain informed consent or assent from         | 11       |
| 27 |                    |                      | potential trial participants or authorised surrogates,  |          |
| 28 |                    |                      | and how (see Item 32)                                   |          |
| 29 |                    |                      |                                                         |          |
| 30 |                    |                      |                                                         |          |
| 31 |                    |                      |                                                         |          |
| 32 |                    |                      |                                                         |          |
| 33 |                    |                      |                                                         |          |
| 34 | Consent or assent: | <a href="#">#26b</a> | Additional consent provisions for collection and use of | NA       |
| 35 | ancillary studies  |                      | participant data and biological specimens in ancillary  |          |
| 36 |                    |                      | studies, if applicable                                  |          |
| 37 |                    |                      |                                                         |          |
| 38 |                    |                      |                                                         |          |
| 39 |                    |                      |                                                         |          |
| 40 |                    |                      |                                                         |          |
| 41 |                    |                      |                                                         |          |
| 42 | Confidentiality    | <a href="#">#27</a>  | How personal information about potential and enrolled   | 13       |
| 43 |                    |                      | participants will be collected, shared, and maintained  |          |
| 44 |                    |                      | in order to protect confidentiality before, during, and |          |
| 45 |                    |                      | after the trial                                         |          |
| 46 |                    |                      |                                                         |          |
| 47 |                    |                      |                                                         |          |
| 48 |                    |                      |                                                         |          |
| 49 |                    |                      |                                                         |          |
| 50 |                    |                      |                                                         |          |
| 51 | Declaration of     | <a href="#">#28</a>  | Financial and other competing interests for principal   | NA (Page |
| 52 | interests          |                      | investigators for the overall trial and each study site | 17)      |
| 53 |                    |                      |                                                         |          |
| 54 |                    |                      |                                                         |          |
| 55 |                    |                      |                                                         |          |
| 56 |                    |                      |                                                         |          |
| 57 |                    |                      |                                                         |          |
| 58 |                    |                      |                                                         |          |
| 59 |                    |                      |                                                         |          |
| 60 |                    |                      |                                                         |          |



|    |                       |                      |                                                            |             |
|----|-----------------------|----------------------|------------------------------------------------------------|-------------|
| 1  | Data access           | <a href="#">#29</a>  | Statement of who will have access to the final trial       | 13          |
| 2  |                       |                      |                                                            |             |
| 3  |                       |                      | dataset, and disclosure of contractual agreements that     |             |
| 4  |                       |                      | limit such access for investigators                        |             |
| 5  |                       |                      |                                                            |             |
| 6  |                       |                      |                                                            |             |
| 7  |                       |                      |                                                            |             |
| 8  | Ancillary and post    | <a href="#">#30</a>  | Provisions, if any, for ancillary and post-trial care, and | NA          |
| 9  | trial care            |                      | for compensation to those who suffer harm from trial       |             |
| 10 |                       |                      | participation                                              |             |
| 11 |                       |                      |                                                            |             |
| 12 |                       |                      |                                                            |             |
| 13 |                       |                      |                                                            |             |
| 14 |                       |                      |                                                            |             |
| 15 |                       |                      |                                                            |             |
| 16 | Dissemination         | <a href="#">#31a</a> | Plans for investigators and sponsor to communicate         | 15          |
| 17 | policy: trial results |                      | trial results to participants, healthcare professionals,   |             |
| 18 |                       |                      | the public, and other relevant groups (eg, via             |             |
| 19 |                       |                      | publication, reporting in results databases, or other      |             |
| 20 |                       |                      | data sharing arrangements), including any publication      |             |
| 21 |                       |                      | restrictions                                               |             |
| 22 |                       |                      |                                                            |             |
| 23 |                       |                      |                                                            |             |
| 24 |                       |                      |                                                            |             |
| 25 |                       |                      |                                                            |             |
| 26 |                       |                      |                                                            |             |
| 27 |                       |                      |                                                            |             |
| 28 |                       |                      |                                                            |             |
| 29 |                       |                      |                                                            |             |
| 30 |                       |                      |                                                            |             |
| 31 | Dissemination         | <a href="#">#31b</a> | Authorship eligibility guidelines and any intended use     | 16          |
| 32 | policy: authorship    |                      | of professional writers                                    |             |
| 33 |                       |                      |                                                            |             |
| 34 |                       |                      |                                                            |             |
| 35 |                       |                      |                                                            |             |
| 36 | Dissemination         | <a href="#">#31c</a> | Plans, if any, for granting public access to the full      | NA          |
| 37 | policy: reproducible  |                      | protocol, participant-level dataset, and statistical code  | (Publishing |
| 38 | research              |                      |                                                            | protocol)   |
| 39 |                       |                      |                                                            |             |
| 40 |                       |                      |                                                            |             |
| 41 |                       |                      |                                                            |             |
| 42 |                       |                      |                                                            |             |
| 43 |                       |                      |                                                            |             |
| 44 | Informed consent      | <a href="#">#32</a>  | Model consent form and other related documentation         | NA (not     |
| 45 | materials             |                      | given to participants and authorised surrogates            | included in |
| 46 |                       |                      |                                                            | protocol)   |
| 47 |                       |                      |                                                            |             |
| 48 |                       |                      |                                                            |             |
| 49 |                       |                      |                                                            |             |
| 50 |                       |                      |                                                            |             |
| 51 | Biological            | <a href="#">#33</a>  | Plans for collection, laboratory evaluation, and storage   | NA          |
| 52 | specimens             |                      | of biological specimens for genetic or molecular           |             |
| 53 |                       |                      |                                                            |             |
| 54 |                       |                      |                                                            |             |
| 55 |                       |                      |                                                            |             |
| 56 |                       |                      |                                                            |             |
| 57 |                       |                      |                                                            |             |
| 58 |                       |                      |                                                            |             |
| 59 |                       |                      |                                                            |             |
| 60 |                       |                      |                                                            |             |

1 analysis in the current trial and for future use in

2  
3 ancillary studies, if applicable

4  
5  
6 The SPIRIT checklist is distributed under the terms of the Creative Commons Attribution License CC-  
7  
8 BY-ND 3.0. This checklist can be completed online using <https://www.goodreports.org/>, a tool made  
9  
10 by the [EQUATOR Network](#) in collaboration with [Penelope.ai](#)  
11  
12  
13  
14  
15  
16  
17  
18  
19  
20  
21  
22  
23  
24  
25  
26  
27  
28  
29  
30  
31  
32  
33  
34  
35  
36  
37  
38  
39  
40  
41  
42  
43  
44  
45  
46  
47  
48  
49  
50  
51  
52  
53  
54  
55  
56  
57  
58  
59  
60
